# Supplementary material for: Experimentally validated machine learning predictions of ultralow thermal conductivity for SnSe materials
Source: Royal Society of Chemistry journal article supplement (doi:10.1039/d3tc01450a), 2023-01-01
Supplement: d3tc01450a1.pdf [file d3tc01450a1.pdf]

# Experimentally Validated Machine Learning Predictions of Ultralow Thermal Conductivity for SnSe Materials

N.K. Barua,<sup>a§</sup> A. Golabek,<sup>a§</sup> A.O. Oliyanyk,<sup>b</sup> and H. Kleinke<sup>a\*</sup>

\*Corresponding author

§Authors made equal contributions

<sup>a</sup> Department of Chemistry, University of Waterloo, 200 University Ave W, Waterloo, ON, Canada

E-mail: [kleinke@uwaterloo.ca](mailto:kleinke@uwaterloo.ca)

<sup>b</sup> Department of Chemistry, Hunter College, City University of New York, New York 10065, NY,

United States

Table S0. Table of contents in the supplementary information.

| <b>Table Information</b> | <b>Description</b>                                                                                                                                                                                                                                                                                               | <b>Page number</b> |
|--------------------------|------------------------------------------------------------------------------------------------------------------------------------------------------------------------------------------------------------------------------------------------------------------------------------------------------------------|--------------------|
| Figure S1                | Schematic diagram of the machine learning workflow.                                                                                                                                                                                                                                                              | S-3                |
| Figure S2                | Extended list of features ranking based on importance score as suggested by XGBoost.                                                                                                                                                                                                                             | S-4                |
| Figure S3                | Schematic diagram of five k-fold cross validation.                                                                                                                                                                                                                                                               | S-4                |
| Figure S4                | Scatter plot of the linear regression model prediction of the test set.                                                                                                                                                                                                                                          | S-5                |
| Figure S5                | Scatter plots of ML models prediction of the training set.                                                                                                                                                                                                                                                       | S-6                |
| Figure S6                | Percent residual error plots of ML models in combined five validation sets.                                                                                                                                                                                                                                      | S-7                |
| Figure S7                | Scatter plots of ML models prediction of the overall validation set.                                                                                                                                                                                                                                             | S-8                |
| Figure S8                | Scatter plots of ML models prediction of the experimental test set.                                                                                                                                                                                                                                              | S-9                |
| Figure S9                | Scatter plots of temperature vs. measured and predicted $\kappa$ values of (a) $\text{Na}_{0.032}\text{Au}_{0.015}\text{Sn}_{0.963}\text{Se}$ , (b) $\text{Na}_{0.033}\text{Ag}_{0.015}\text{Sn}_{0.961}\text{Se}$ , and (c) $\text{Sn}_{1.002}\text{Se}_{0.900}\text{Br}_{0.100}$ in the experimental test set. | S-10               |
| Figure S10               | Scatter plots of temperature vs. measured and predicted $\kappa$ values of (a) Cl- and (b) Br-doped SnSe in the experimental test set.                                                                                                                                                                           | S-11               |
| Figure S11               | Scatter plots of XGBoost's prediction of the revised training set and the revised test set (T2).                                                                                                                                                                                                                 | S-11               |
| Table S1                 | List of compositions used in the training set.                                                                                                                                                                                                                                                                   | S-12               |
| Table S2                 | Occurrences of elements in the compositions in the training dataset.                                                                                                                                                                                                                                             | S-14               |
| Table S3                 | Features used in the training dataset prior to the implementation of feature selection methods.                                                                                                                                                                                                                  | S-15               |
| Table S4                 | Weighted features mathematical calculations using NumPy.                                                                                                                                                                                                                                                         | S-21               |
| Table S5                 | Hyperparameters used in feature selection methods.                                                                                                                                                                                                                                                               | S-22               |
| Table S6                 | Hyperparameters used in different ML models during model selection step.                                                                                                                                                                                                                                         | S-23               |
| Table S7                 | Regression metrics of ML models of validation sets from $k$ -fold.                                                                                                                                                                                                                                               | S-25               |
| Table S8                 | Regression metrics of ML models in training, validation, and test set.                                                                                                                                                                                                                                           | S-25               |
| —                        | References                                                                                                                                                                                                                                                                                                       | S-26               |

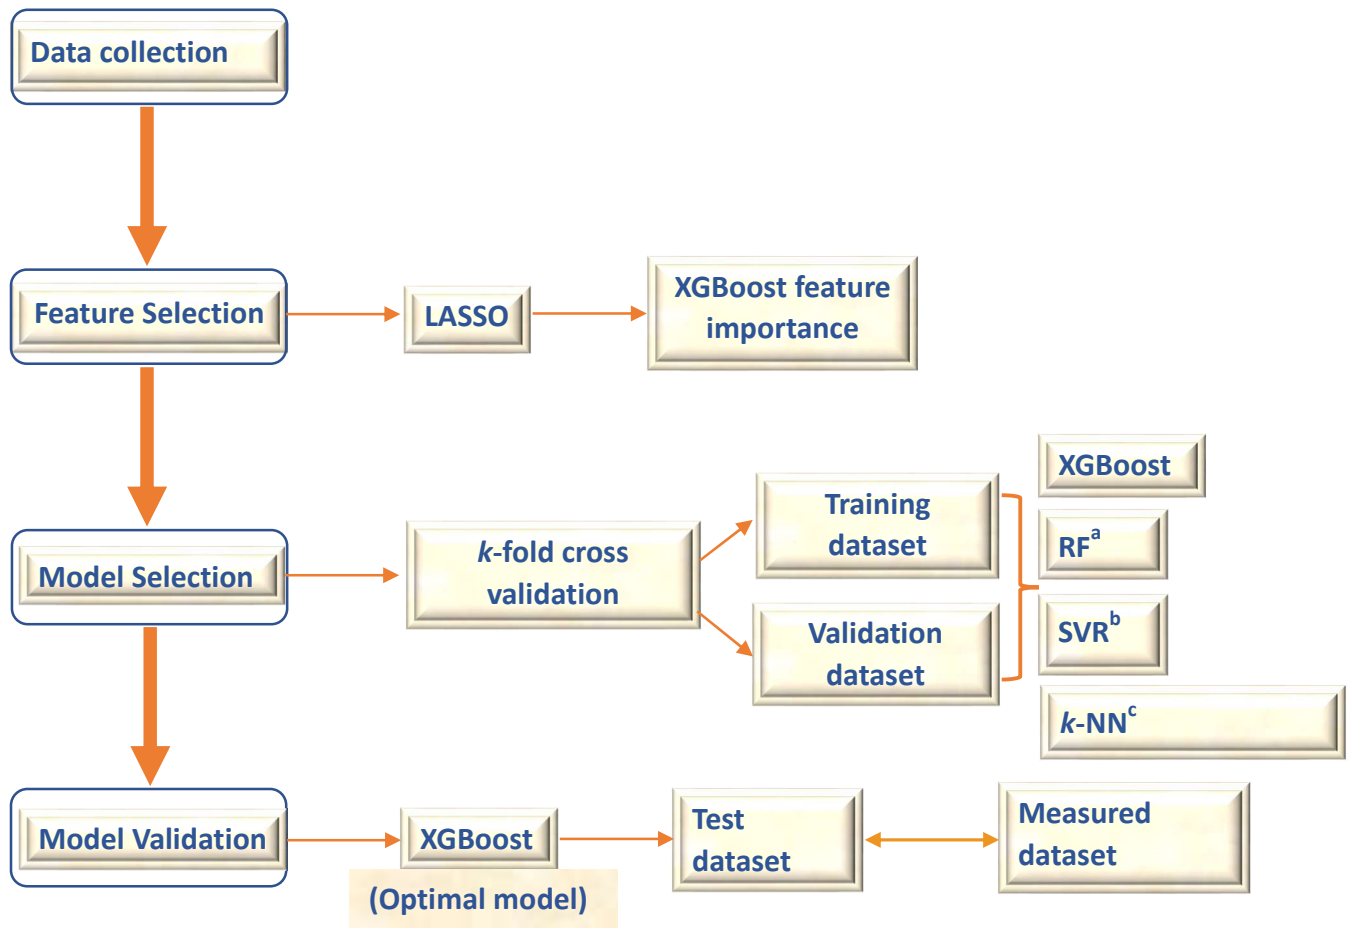

<sup>a</sup> Random Forest

<sup>b</sup> Support Vector Regression

<sup>c</sup> k-Nearest Neighbor

Figure S1. Schematic diagram of the machine learning workflow for this study.<sup>1</sup>

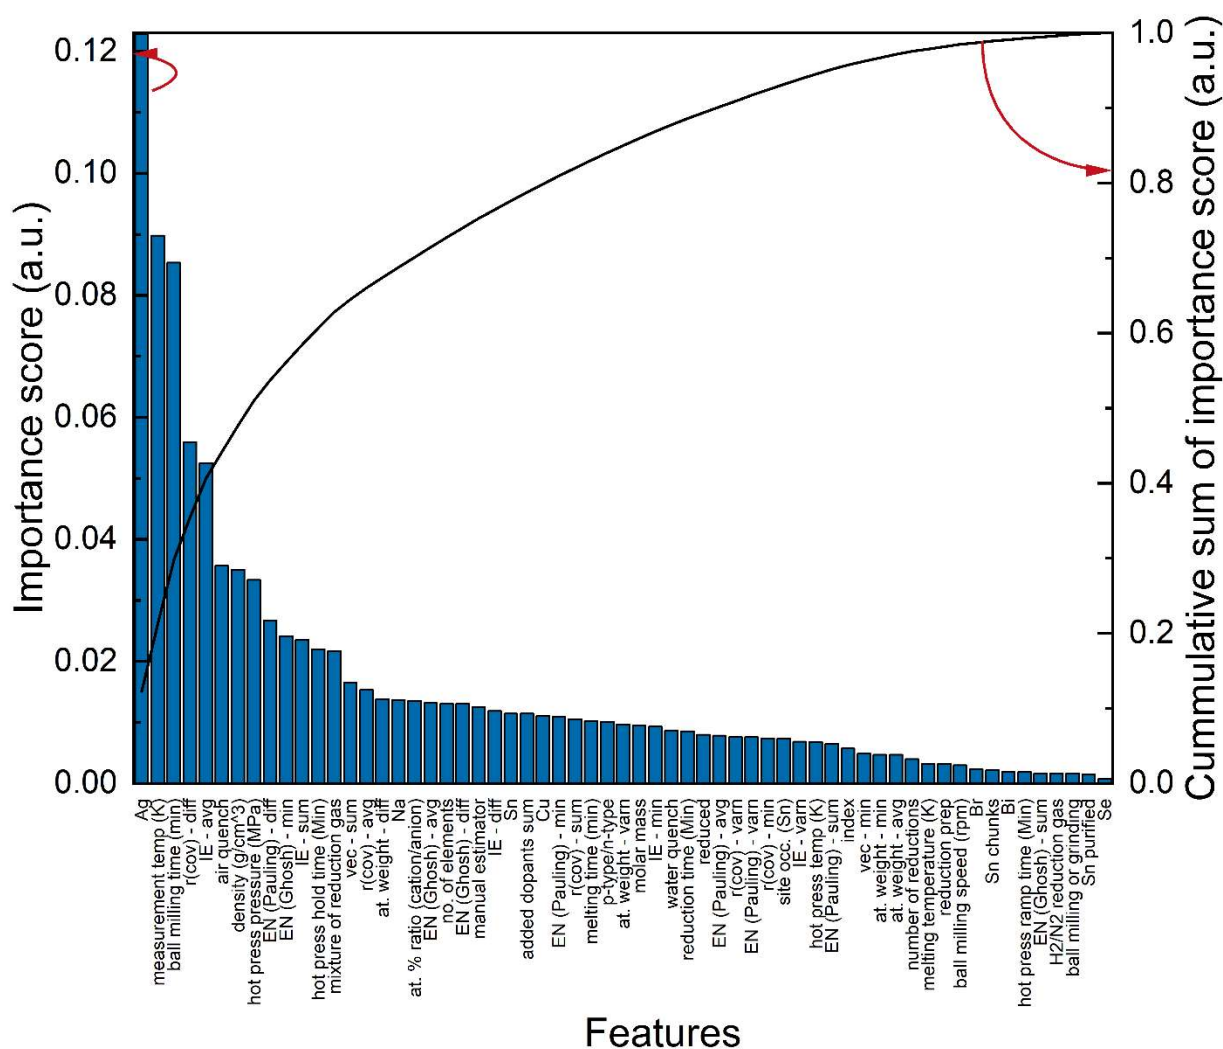

Figure S2. Extended list of features ranking based on importance score as suggested by XGBoost.

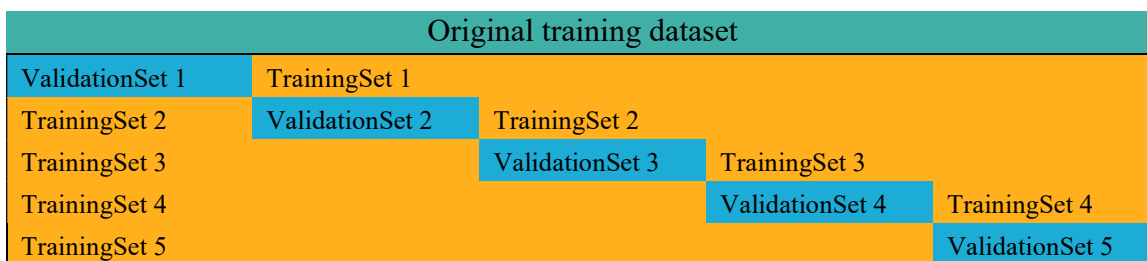

Figure S3. Schematic diagram of five k-fold cross validation.<sup>2</sup>

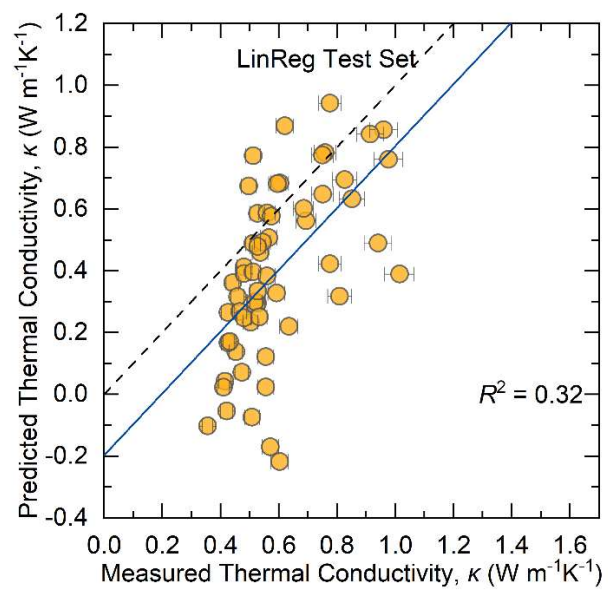

Figure S4. Scatter plot of the linear regression model prediction of the test set.

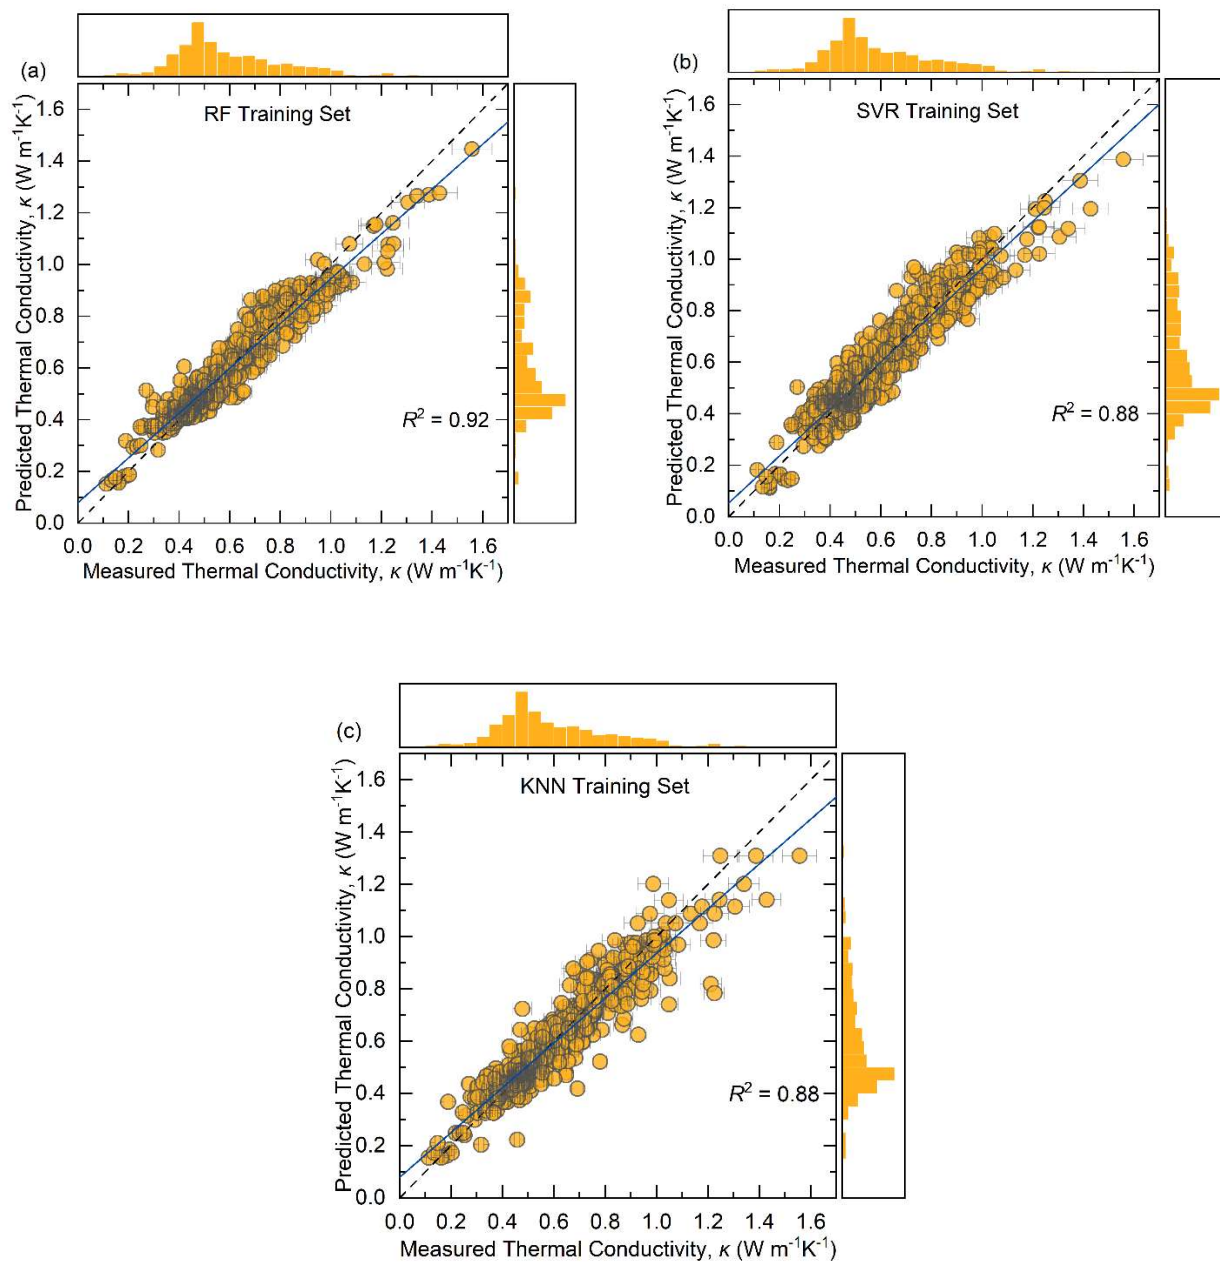

Figure S5. Scatter plots of ML models prediction of the training set.

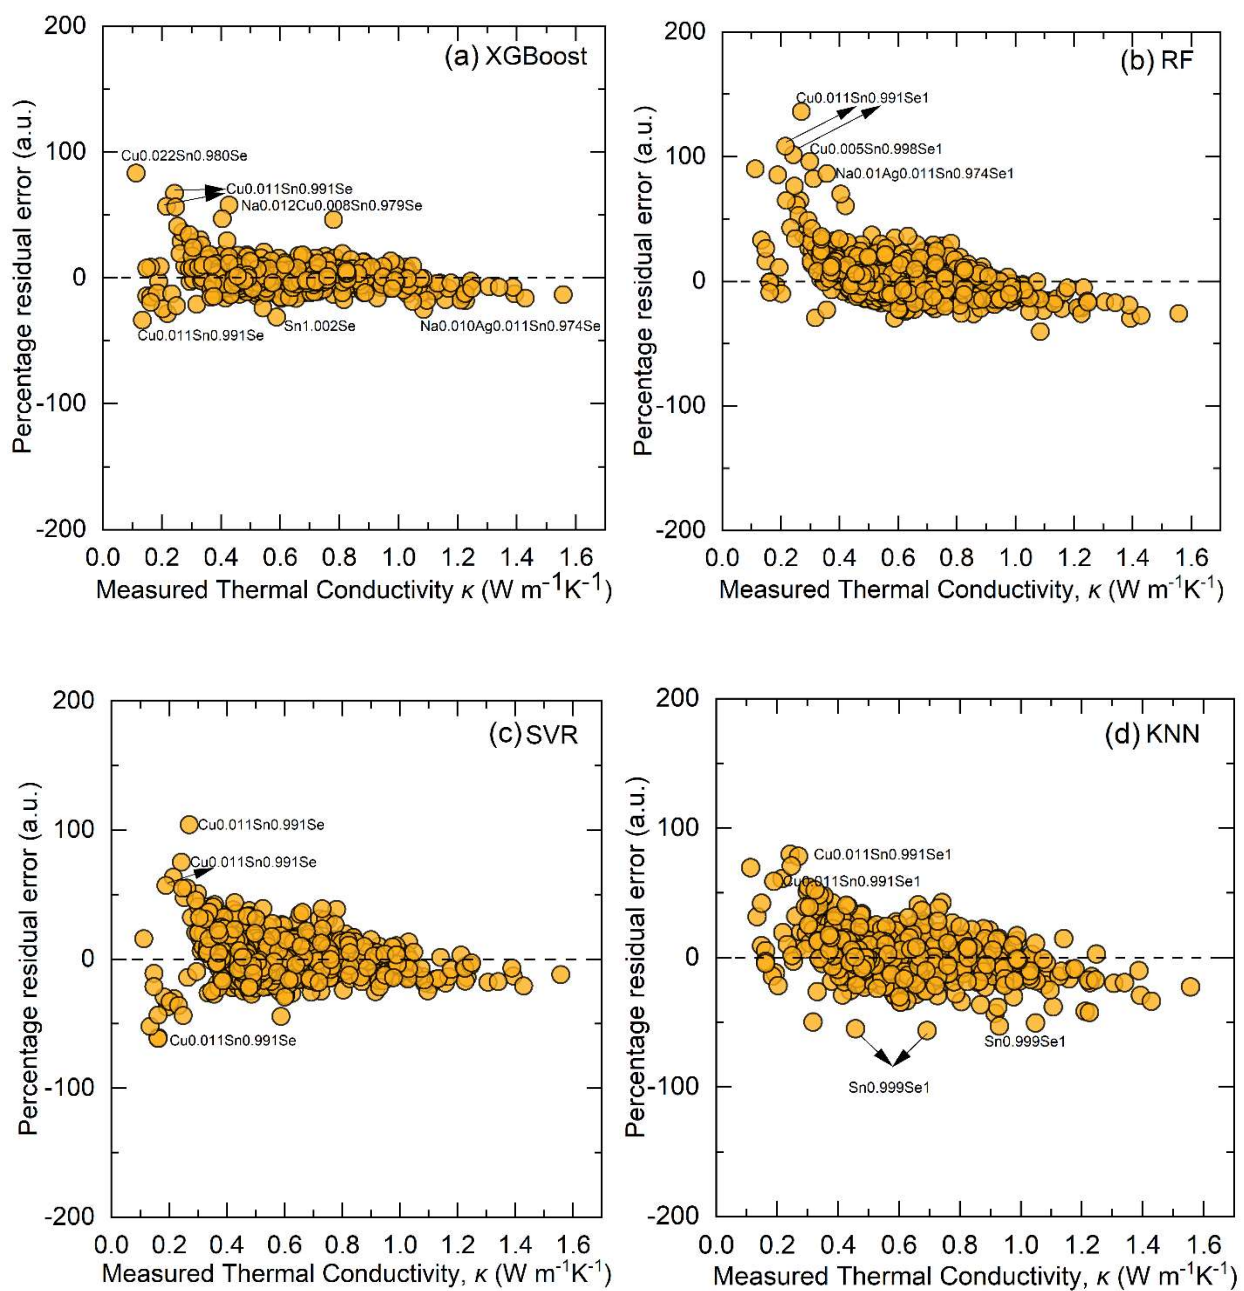

Figure S6. Percent residual error plots of ML models in combined five validation sets.<sup>3</sup>

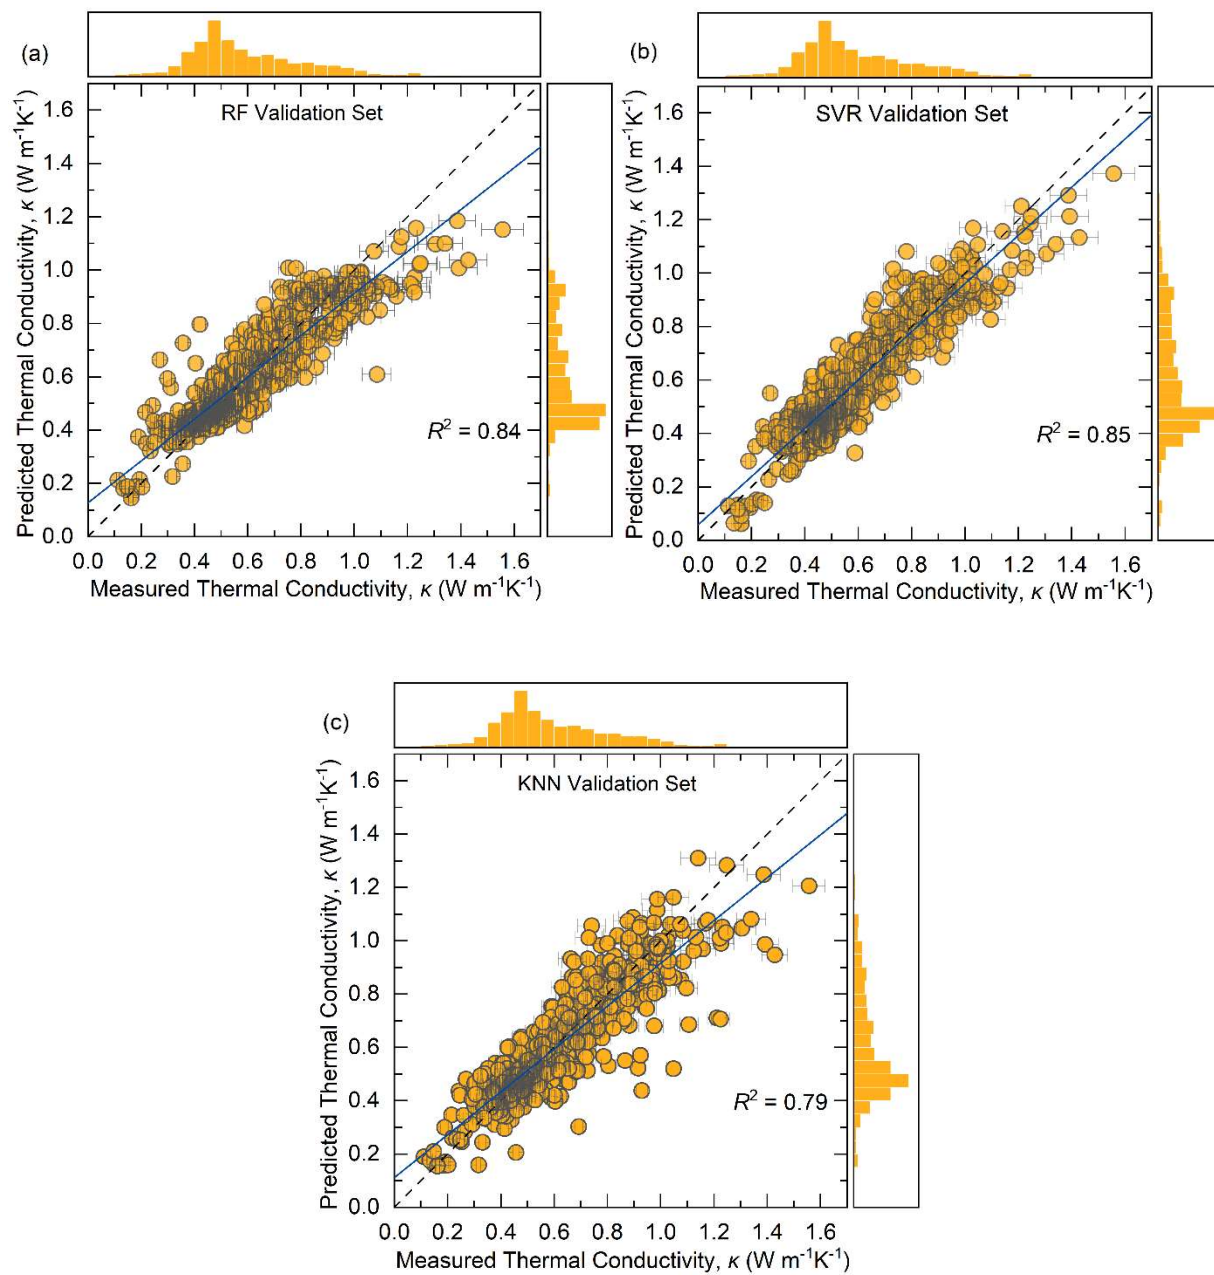

Figure S7. Scatter plots of ML models prediction of the overall validation set.



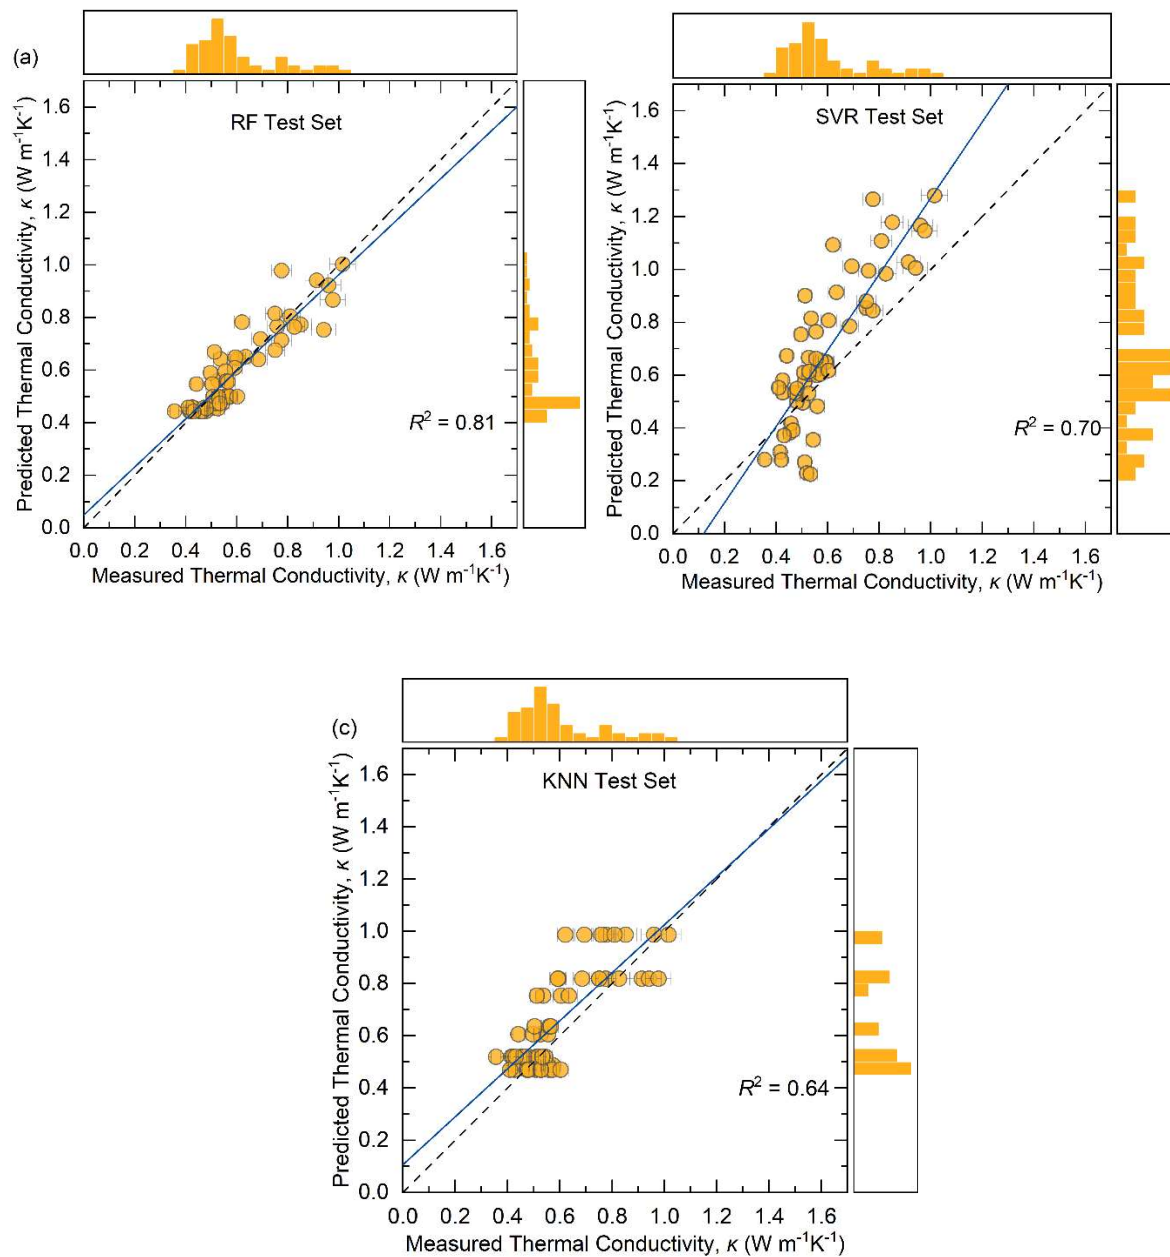

Figure S8. Scatter plots of ML models prediction of the experimental test set.

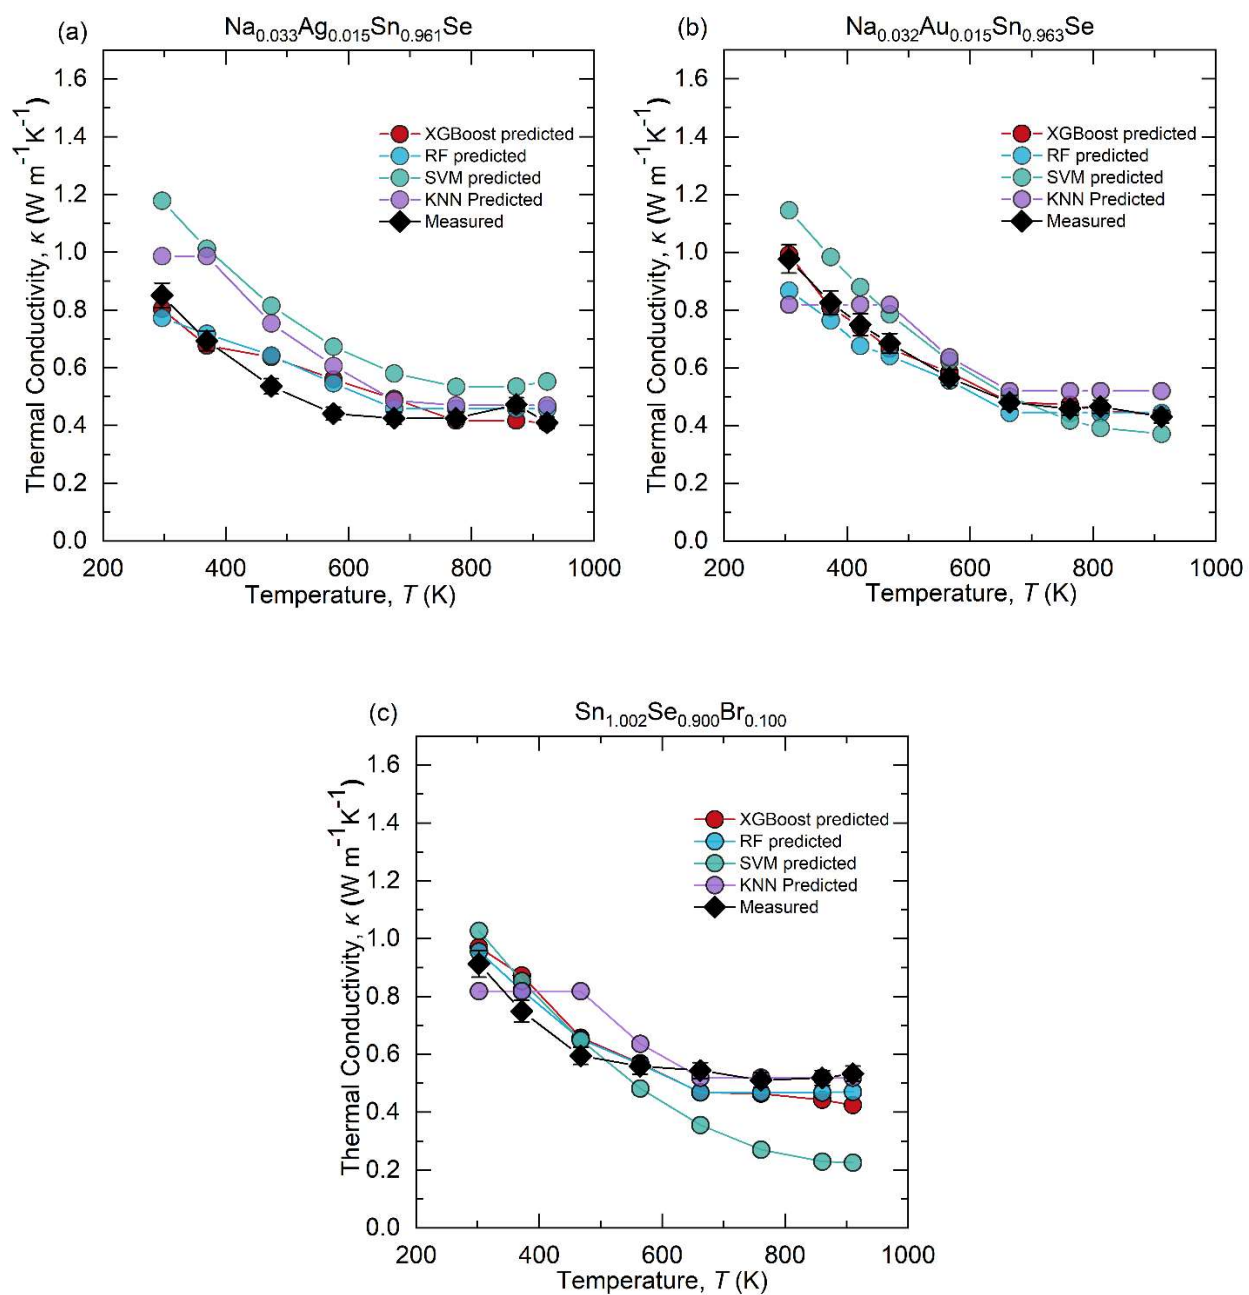

Figure S9. Scatter plots of temperature vs. measured and predicted  $\kappa$  values of (a)  $\text{Na}_{0.033}\text{Ag}_{0.015}\text{Sn}_{0.961}\text{Se}$ , (b)  $\text{Na}_{0.032}\text{Au}_{0.015}\text{Sn}_{0.963}\text{Se}$ , and (c)  $\text{Sn}_{1.002}\text{Se}_{0.900}\text{Br}_{0.100}$  in the experimental test set.

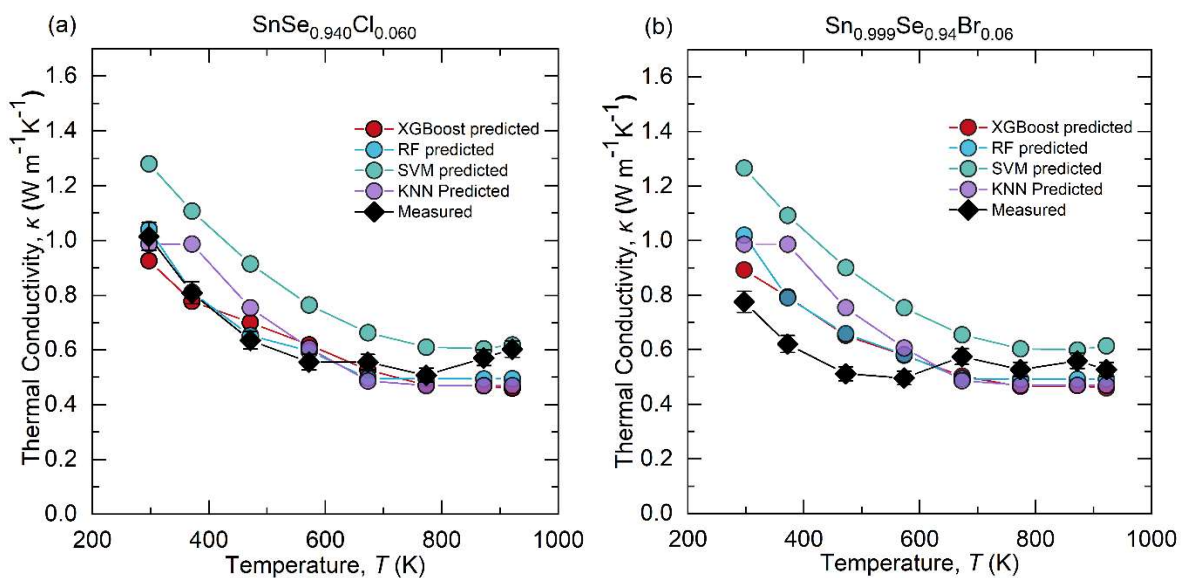

Figure S10. Scatter plots of temperature vs. measured and predicted  $\kappa$  values of (a) Cl- and (b) Br-doped SnSe in the experimental test set.

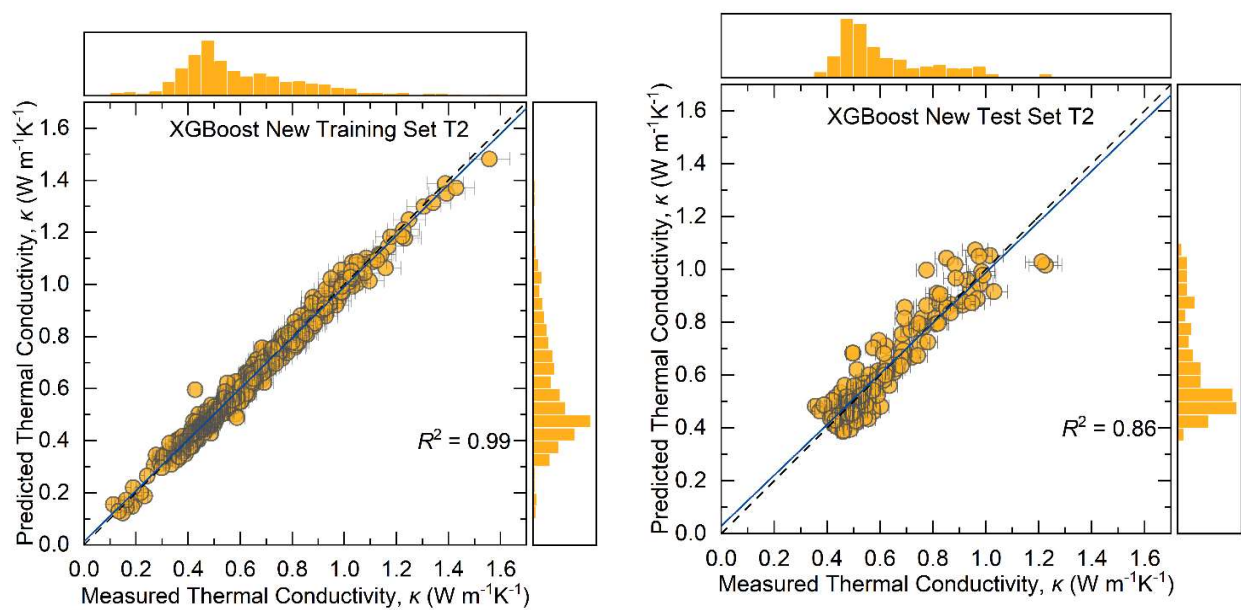

Figure S11. Scatter plots of XGBoost for prediction of the revised training set and the revised test set (T2).

Table S1. List of compositions used in the training set.

| Composition                             | Type of Dopant |
|-----------------------------------------|----------------|
| Sn0.997Se1                              | p-type         |
| Cu0.021Sn0.983Se1                       | p-type         |
| Sn1.006Se1                              | p-type         |
| Sn1.002Se1                              | p-type         |
| Cu0.005Sn0.998Se1                       | p-type         |
| Cu0.01Sn0.989Se1                        | p-type         |
| Cu0.019Sn0.979Se1                       | p-type         |
| Cu0.041Sn0.958Se1                       | p-type         |
| Cu0.011Sn0.991Se1                       | p-type         |
| Cu0.022Sn0.98Se1                        | p-type         |
| Cu0.062Sn0.941Se1                       | p-type         |
| Cu0.078Sn0.918Se1                       | p-type         |
| Cu0.08Sn0.919Se1                        | p-type         |
| Sn0.999Se1                              | p-type         |
| Cu0.009Sn0.999Se1                       | p-type         |
| Na0.012Cu0.008Sn0.994Ge0.025Se0.95S0.05 | p-type         |
| Na0.01Cu0.011Sn0.978Se1                 | p-type         |
| Li0.01Cu0.009Sn0.974Se1                 | p-type         |
| Na0.01Ag0.01Sn0.998Se1                  | p-type         |
| Na0.01Ag0.011Sn0.974Se1                 | p-type         |
| Na0.01Sn0.976Au0.01Se1                  | p-type         |
| Na0.025Cu0.005Sn0.969Se1                | p-type         |
| Na0.03Sn0.969Se1                        | p-type         |
| Na0.09Cu0.012Ag0.01Sn0.971Se1           | p-type         |
| Na0.021Cu0.005Sn0.974Se1                | p-type         |
| Na0.03Sn0.97Se1                         | p-type         |
| Na0.01Ag0.01Sn0.981Se1                  | p-type         |
| Na0.01Cu0.01Sn0.979Se1                  | p-type         |
| Na0.01Cu0.01Ag0.01Sn0.98Se1             | p-type         |
| Na0.01Cu0.01Sn0.98Se1                   | p-type         |
| Na0.029Cu0.002Sn0.969Se1                | p-type         |
| Na0.028Cu0.01Sn0.963Se1                 | p-type         |
| Na0.033Cu0.016Sn0.961Se1                | p-type         |
| Na0.025Cu0.006Sn0.968Se1                | p-type         |
| Na0.026Cu0.01Sn0.961Se1                 | p-type         |
| Na0.021Cu0.003Sn0.978Se1                | p-type         |
| Na0.019Cu0.009Sn0.972Se1                | p-type         |
| Na0.02Cu0.015Sn0.965Se1                 | p-type         |

|                                      |        |
|--------------------------------------|--------|
| Na0.014Cu0.006Sn0.98Se1              | p-type |
| Na0.014Cu0.012Sn0.973Se1             | p-type |
| Na0.011Cu0.003Sn0.99Se1              | p-type |
| Na0.011Cu0.008Sn0.978Se1             | p-type |
| Na0.007Cu0.015Sn0.977Se1             | p-type |
| Sn1.001Se1                           | p-type |
| Na0.01Ag0.01Sn0.98Se1                | p-type |
| Na0.01Cu0.002Ag0.006Sn0.97Ge0.001Se1 | p-type |
| Cu0.015Sn0.985Se1                    | p-type |
| Cu0.007Sn0.992Se1                    | p-type |
| Na0.015Sn0.985Se1                    | p-type |
| Na0.013Cu0.002Sn0.986Se1             | p-type |
| Na0.03Cu0.008Sn0.962Se1              | p-type |
| Sn0.996Bi0.006Se0.974Br0.026         | n-type |
| Sn0.997Bi0.005Se0.97Br0.03           | n-type |
| Sn0.988Bi0.01Se0.98Br0.02            | n-type |
| Sn0.984Bi0.021Se0.99Br0.01           | n-type |
| Sn0.982Bi0.026Se0.994Br0.006         | n-type |
| Sn0.965Bi0.03Se0.994Br0.006          | n-type |
| Sn0.987Bi0.007Se0.984Br0.016         | n-type |
| Sn0.991Bi0.004Se0.992Br0.008         | n-type |
| Sn0.983Bi0.006Se0.977Br0.023         | n-type |
| Sn0.985Bi0.005Se0.98Br0.02           | n-type |
| Sn0.99Bi0.005Se0.989Br0.011          | n-type |
| Sn0.995Bi0.004Se0.992Br0.008         | n-type |
| Sn0.976Bi0.011Se0.977Br0.023         | n-type |
| Sn0.995Se0.959Br0.041                | n-type |
| Sn0.964Bi0.041Se1                    | n-type |
| Sn0.999Se0.94Br0.06                  | n-type |
| Sn0.94Bi0.06Se1                      | n-type |
| Sn0.972Bi0.029Se0.97Br0.03           | n-type |
| Sn0.982Bi0.02Se0.955Br0.045          | n-type |
| Sn0.952Bi0.045Se0.98Br0.02           | n-type |
| Sn0.953Bi0.046Se0.955Br0.045         | n-type |
| Sn0.94Bi0.061Se0.939Br0.061          | n-type |
| Na0.012Cu0.008Sn0.979Se1             | p-type |
| Sn0.997Se1                           | p-type |

---

**75 samples, 10 temperatures -> 750 data**

Table S2. Occurrences of elements in the heterogeneous compositions in training dataset.

| Composition<br>Elements | Binary | Ternary | Quaternary | Quinary | Senary | Total |
|-------------------------|--------|---------|------------|---------|--------|-------|
| Sn                      | 55     | 205     | 471        | 18      | 27     | 776   |
| Se                      | 55     | 205     | 471        | 18      | 27     | 776   |
| Li                      | —      | —       | 9          | —       | —      | 9     |
| Na                      | —      | 48      | 288        | 18      | 27     | 381   |
| Cu                      | —      | 118     | 238        | 18      | 27     | 401   |
| Ag                      | —      | —       | 49         | 18      | 8      | 75    |
| Au                      | —      | —       | 10         | —       | —      | 10    |
| Ge                      | —      | —       | —          | —       | 27     | 27    |
| Bi                      | —      | 19      | 174        | —       | —      | 193   |
| S                       | —      | —       | —          | —       | 19     | 19    |
| Br                      | —      | 20      | 174        | —       | —      | 194   |
| Cl                      | —      | —       | —          | —       | —      | —     |

Table S3. Features used in the training dataset prior to the implementation of feature selection methods.

| Sl. No | Feature                         | Feature explanation                                                                                                                                                                                                                                                                              |
|--------|---------------------------------|--------------------------------------------------------------------------------------------------------------------------------------------------------------------------------------------------------------------------------------------------------------------------------------------------|
| 1      | composition                     | chemical formula                                                                                                                                                                                                                                                                                 |
| 2      | <i>p</i> -type/ <i>n</i> -type  | type of semiconductor                                                                                                                                                                                                                                                                            |
| 3      | at. % ratio<br>(cation/anion)   | ratio of all the cations with the anions in a composition                                                                                                                                                                                                                                        |
| 4      | added dopants sum               | sum of the dopant elements % atomic. For example, for Na <sub>0.01</sub> Cu <sub>0.02</sub> Sn <sub>0.97</sub> Se: 0.01 + 0.02 = 0.03; Sn <sub>0.9</sub> Bi <sub>0.1</sub> Se <sub>0.95</sub> Br <sub>0.05</sub> : 0.1 + 0.05 = 0.15. Alloying elements like Ge on the Sn site are not included. |
| 5      | site occ. (Sn)                  | occupancy of the cations in the Sn site subtracting the selenium in the composition                                                                                                                                                                                                              |
| 6      | molar mass                      | molar mass of the composition                                                                                                                                                                                                                                                                    |
| 7      | sum alloying                    | summation of the alloying elements. For example: Na <sub>0.012</sub> Cu <sub>0.008</sub> Sn <sub>0.994</sub> Ge <sub>0.025</sub> Se <sub>0.950</sub> S <sub>0.050</sub> : 0.025 + 0.05 = 0.075. Doping elements are not included.                                                                |
| 8      | Cp (3R)                         | calculated heat capacity based on Dulong-Petit                                                                                                                                                                                                                                                   |
| 9      | relative mass (theor.)          | molar mass of the composition divided by the molar mass of pure SnSe                                                                                                                                                                                                                             |
| 10     | manual estimator of performance | formula (Sn type × # of reductions + cooling type)/(sum of added dopants + % theoretical density). Sn type values are 1 for powder, 2 for chunks, 3 for purified; cooling type is 3 for furnace, 2 for air, 1 for water, and 0 for NA (not applicable).                                          |
| 11     | no. of elements                 | number of the elements in the material                                                                                                                                                                                                                                                           |
| 12     | Na                              | atomic amount of a given element in the formula.<br><br>For example:<br>Na <sub>0.030</sub> Sn <sub>0.969</sub> Se <sub>1</sub> implies 0.03 for the Na column 0.03, 0.969 for Sn, and 1 for Se. The rest of the elements are set to 0.                                                          |
| 13     | Li                              |                                                                                                                                                                                                                                                                                                  |
| 14     | Cu                              |                                                                                                                                                                                                                                                                                                  |
| 15     | Ag                              |                                                                                                                                                                                                                                                                                                  |
| 16     | Sn                              |                                                                                                                                                                                                                                                                                                  |
| 17     | Ge                              |                                                                                                                                                                                                                                                                                                  |
| 18     | Au                              |                                                                                                                                                                                                                                                                                                  |
| 19     | Bi                              |                                                                                                                                                                                                                                                                                                  |
| 20     | Se                              |                                                                                                                                                                                                                                                                                                  |
| 21     | S                               |                                                                                                                                                                                                                                                                                                  |
| 22     | Br                              |                                                                                                                                                                                                                                                                                                  |
| 23     | Cl                              |                                                                                                                                                                                                                                                                                                  |
| 24     | Sn purified                     | physical form of Sn.<br>1 means Sn was purified.                                                                                                                                                                                                                                                 |

|    |                                                  |                                                                                                                                                           |
|----|--------------------------------------------------|-----------------------------------------------------------------------------------------------------------------------------------------------------------|
|    |                                                  | 0 means Sn was not purified.<br>Purified means chunks of Sn have been subjected to the purification process <sup>4</sup> (repeated melting and cleaning). |
| 25 | Sn chunks                                        | chunks mean Sn chunks that have not been purified.                                                                                                        |
| 26 | Sn powder                                        | powder is powder form of Sn.                                                                                                                              |
| 27 | melting temperature (K)                          | temperature of the furnace for melting Sn                                                                                                                 |
| 28 | melting time (min)                               | time taken for melting Sn                                                                                                                                 |
| 29 | no quench                                        | quenching of the reaction tube not performed                                                                                                              |
| 30 | furnace quench                                   | quenched reaction tube in the furnace                                                                                                                     |
| 31 | air quench                                       | quenched reaction tube by air cooling on a firebrick                                                                                                      |
| 32 | water quench                                     | quenched by placing the reaction tube in water bath                                                                                                       |
| 33 | melt- and ball milling-synthesis (1/0)           | composition synthesized using melting or by ball milling                                                                                                  |
| 34 | ball milling speed (rpm)                         | speed of the ball milling process                                                                                                                         |
| 35 | ball milling time (min)                          | time taken for the ball milling process                                                                                                                   |
| 36 | reduced                                          | whether SnSe was reduced by reduction process                                                                                                             |
| 37 | number of reductions                             | number of reduction cycles undertaken for SnSe to remove oxides                                                                                           |
| 38 | reduction prep (1=mortar/pestle/0=ball milled)   | whether SnSe was crushed using mortar/pestle or ball milled before the reduction process                                                                  |
| 39 | mixture of reduction gas                         | mixture of gas (2=5%H <sub>2</sub> /Ar, 1=7%H <sub>2</sub> /N <sub>2</sub> , 0=NA) used for the reduction process                                         |
| 40 | H <sub>2</sub> /Ar reduction gas                 | mixture of gas used during the reduction process                                                                                                          |
| 41 | H <sub>2</sub> /N <sub>2</sub> reduction gas     |                                                                                                                                                           |
| 42 | no reduction gas                                 |                                                                                                                                                           |
| 43 | reduction temp (K)                               | maximum temperature of the furnace used for the reduction process                                                                                         |
| 44 | reduction time (min)                             | the time used for the reduction process                                                                                                                   |
| 45 | annealing                                        | If the sample was annealed                                                                                                                                |
| 46 | annealing (1=before hot press/0=after hot press) | whether the annealing process was completed before hot pressing in the powdered form—1 or after hot pressing in the pellet form—0                         |
| 47 | annealing time (min)                             | the time used for annealing at the maximum temperature                                                                                                    |
| 48 | annealing temp (K)                               | temperature at which the sample was annealed                                                                                                              |
| 49 | ball milling or grinding before hot press        | whether the sample was ball milled or ground by hand using the mortar and pestle                                                                          |



|    |                                                            |                                                                                                                                                                         |
|----|------------------------------------------------------------|-------------------------------------------------------------------------------------------------------------------------------------------------------------------------|
| 50 | sieved before hot press                                    | whether the sample was sieved to < 63 $\mu\text{m}$ before hot pressing                                                                                                 |
| 51 | hot press temp (K)                                         | maximum temperature of the hot-pressing process.                                                                                                                        |
| 52 | hot press ramp time (min)                                  | time for the sample to reach the maximum temperature in the hot press                                                                                                   |
| 53 | hot press hold time (min)                                  | time for the sample at the maximum temperature in the hot press                                                                                                         |
| 54 | hot press pressure (MPa)                                   | pressure used for sintering the sample in the hot press                                                                                                                 |
| 55 | density ( $\text{g}/\text{cm}^3$ )                         | density of the sample measured in the pellet form                                                                                                                       |
| 56 | lowest total thermal cond ( $\text{W}/\text{m}/\text{K}$ ) | minimal thermal conductivity of the sample                                                                                                                              |
| 57 | measurement temp (K)                                       | temperature points when measuring thermal diffusivity                                                                                                                   |
| 58 | EN (Pauling) - Na                                          | the value is calculated by multiplying the atomic amount of an element in the formula with the Pauling electronegativity of the element.                                |
| 59 | EN (Pauling) - Li                                          |                                                                                                                                                                         |
| 60 | EN (Pauling) - Cu                                          |                                                                                                                                                                         |
| 61 | EN (Pauling) - Ag                                          |                                                                                                                                                                         |
| 62 | EN (Pauling) - Sn                                          |                                                                                                                                                                         |
| 63 | EN (Pauling) - Ge                                          |                                                                                                                                                                         |
| 64 | EN (Pauling) - Au                                          |                                                                                                                                                                         |
| 65 | EN (Pauling) - Bi                                          |                                                                                                                                                                         |
| 66 | EN (Pauling) - Se                                          |                                                                                                                                                                         |
| 67 | EN (Pauling) - S                                           |                                                                                                                                                                         |
| 68 | EN (Pauling) - Br                                          |                                                                                                                                                                         |
| 69 | EN (Pauling) - Cl                                          |                                                                                                                                                                         |
| 70 | EN (Pauling) - varn                                        | the variation is calculated by applying variance to all the elements with weighted Pauling electronegativity calculation in the composition (Table S3 (b))              |
| 71 | EN (Pauling) - sum                                         | The sum is calculated by adding to all the elements with weighted Pauling electronegativity calculation in the composition (Table S3 (b)).                              |
| 72 | EN (Pauling) - max                                         | The maximum is calculated by taking the maximum weighted value from all the elements with weighted Pauling electronegativity in the composition (Table S3 (b)).         |
| 73 | EN (Pauling) - avg                                         | The average is calculated by taking the average weighted value from all the elements with weighted Pauling electronegativity present in the composition (Table S3 (b)). |
| 74 | EN (Pauling) - min                                         | The minimum is calculated by taking the minimum weighted value from all the elements with weighted Pauling electronegativity in the composition (Table S3 (b)).         |

|     |                     |                                                                                                                                        |
|-----|---------------------|----------------------------------------------------------------------------------------------------------------------------------------|
| 75  | EN (Pauling) - diff | The difference is calculated by subtracting EN (Pauling) – max with EN (Pauling) - min (Table S3 (b)).                                 |
| 76  | EN (Ghosh) - Na     | The value is calculated by multiplying the atomic amount of an element in composition with the Ghosh electronegativity of the element. |
| 77  | EN (Ghosh) - Li     |                                                                                                                                        |
| 78  | EN (Ghosh) - Cu     |                                                                                                                                        |
| 79  | EN (Ghosh) - Ag     |                                                                                                                                        |
| 80  | EN (Ghosh) - Sn     |                                                                                                                                        |
| 81  | EN (Ghosh) - Ge     |                                                                                                                                        |
| 82  | EN (Ghosh) - Au     |                                                                                                                                        |
| 83  | EN (Ghosh) - Bi     |                                                                                                                                        |
| 84  | EN (Ghosh) - Se     |                                                                                                                                        |
| 85  | EN (Ghosh) - S      |                                                                                                                                        |
| 86  | EN (Ghosh) - Br     |                                                                                                                                        |
| 87  | EN (Ghosh) - Cl     |                                                                                                                                        |
| 88  | EN (Ghosh) - varn   |                                                                                                                                        |
| 89  | EN (Ghosh) - sum    |                                                                                                                                        |
| 90  | EN (Ghosh) - max    |                                                                                                                                        |
| 91  | EN (Ghosh) - avg    |                                                                                                                                        |
| 92  | EN (Ghosh) - min    |                                                                                                                                        |
| 93  | EN (Ghosh) - diff   |                                                                                                                                        |
| 94  | IE - Na             | The value is calculated by multiplying the atomic amount of an element in composition with the Ionization energy of the element.       |
| 95  | IE - Li             |                                                                                                                                        |
| 96  | IE - Cu             |                                                                                                                                        |
| 97  | IE - Ag             |                                                                                                                                        |
| 98  | IE - Sn             |                                                                                                                                        |
| 99  | IE - Ge             |                                                                                                                                        |
| 100 | IE - Au             |                                                                                                                                        |
| 101 | IE - Bi             |                                                                                                                                        |
| 102 | IE - Se             |                                                                                                                                        |
| 103 | IE - S              |                                                                                                                                        |
| 104 | IE - Br             |                                                                                                                                        |
| 105 | IE - Cl             |                                                                                                                                        |
| 106 | IE - varn           |                                                                                                                                        |
| 107 | IE - sum            |                                                                                                                                        |
| 108 | IE - max            |                                                                                                                                        |
| 109 | IE - avg            |                                                                                                                                        |
| 110 | IE - min            |                                                                                                                                        |
| 111 | IE - diff           |                                                                                                                                        |
| 112 | at. weight - Na     |                                                                                                                                        |

|     |                   |                                                                                                                                           |  |
|-----|-------------------|-------------------------------------------------------------------------------------------------------------------------------------------|--|
| 113 | at. weight - Li   | The value is calculated by multiplying the atomic amount of an element in composition with the atomic weight of the element.              |  |
| 114 | at. weight - Cu   |                                                                                                                                           |  |
| 115 | at. weight - Ag   |                                                                                                                                           |  |
| 116 | at. weight - Sn   |                                                                                                                                           |  |
| 117 | at. weight - Ge   |                                                                                                                                           |  |
| 118 | at. weight - Au   |                                                                                                                                           |  |
| 119 | at. weight - Bi   |                                                                                                                                           |  |
| 120 | at. weight - Se   |                                                                                                                                           |  |
| 121 | at. weight - S    |                                                                                                                                           |  |
| 122 | at. weight - Br   |                                                                                                                                           |  |
| 123 | at. weight - Cl   |                                                                                                                                           |  |
| 124 | at. weight - varn |                                                                                                                                           |  |
| 125 | at. weight - sum  |                                                                                                                                           |  |
| 126 | at. weight - max  |                                                                                                                                           |  |
| 127 | at. weight - avg  |                                                                                                                                           |  |
| 128 | at. weight - min  |                                                                                                                                           |  |
| 129 | at. weight - diff |                                                                                                                                           |  |
| 130 | vec - Na          | The value is calculated by multiplying the atomic amount of an element in composition with the number of valence electron of the element. |  |
| 131 | vec - Li          |                                                                                                                                           |  |
| 132 | vec - Cu          |                                                                                                                                           |  |
| 133 | vec - Ag          |                                                                                                                                           |  |
| 134 | vec - Sn          |                                                                                                                                           |  |
| 135 | vec - Ge          |                                                                                                                                           |  |
| 136 | vec - Au          |                                                                                                                                           |  |
| 137 | vec - Bi          |                                                                                                                                           |  |
| 138 | vec - Se          |                                                                                                                                           |  |
| 139 | vec - S           |                                                                                                                                           |  |
| 140 | vec - Br          |                                                                                                                                           |  |
| 141 | vec - Cl          |                                                                                                                                           |  |
| 142 | vec - varn        |                                                                                                                                           |  |
| 143 | vec - sum         |                                                                                                                                           |  |
| 144 | vec - max         |                                                                                                                                           |  |
| 145 | vec - avg         |                                                                                                                                           |  |
| 146 | vec - min         |                                                                                                                                           |  |
| 147 | vec - diff        |                                                                                                                                           |  |
| 148 | r(cov) - Na       | The value is calculated by multiplying the atomic amount of an element in composition with the covalent radius of the element.            |  |
| 149 | r(cov) - Li       |                                                                                                                                           |  |
| 150 | r(cov) - Cu       |                                                                                                                                           |  |
| 151 | r(cov) - Ag       |                                                                                                                                           |  |

|     |               |  |
|-----|---------------|--|
| 152 | r(cov) - Sn   |  |
| 153 | r(cov) - Ge   |  |
| 154 | r(cov) - Au   |  |
| 155 | r(cov) - Bi   |  |
| 156 | r(cov) - Se   |  |
| 157 | r(cov) - S    |  |
| 158 | r(cov) - Br   |  |
| 159 | r(cov) - Cl   |  |
| 160 | r(cov) - varn |  |
| 161 | r(cov) - sum  |  |
| 162 | r(cov) - max  |  |
| 163 | r(cov) - avg  |  |
| 164 | r(cov) - min  |  |
| 165 | r(cov) - diff |  |

Table S4. Weighted features mathematical calculations.<sup>5</sup>

| Example                                                                         | Weighted elemental stoichiometry features (WESF) | Formula applied                               | Weighted value |
|---------------------------------------------------------------------------------|--------------------------------------------------|-----------------------------------------------|----------------|
| Sn <sub>0.997</sub> Se                                                          | EN (Pauling) – Sn                                | Electronegativity of Sn × 0.9973 <sup>a</sup> | 1.954719       |
| Na <sub>0.021</sub> Cu <sub>0.005</sub> Sn <sub>0.974</sub> Se                  | r(cov) – Sn                                      | Covalent radius of Sn × 0.9741 <sup>a</sup>   | 1.373453       |
| Na <sub>0.010</sub> Ag <sub>0.010</sub> Sn <sub>0.980</sub> Se                  | vec - Ag                                         | Valence electrons of Ag × 0.0100 <sup>a</sup> | 0.109357       |
| Sn <sub>0.996</sub> Bi <sub>0.006</sub> Se <sub>0.974</sub> Br <sub>0.026</sub> | IE – Br                                          | Ionization energy of Br × 0.026               | 0.306568       |

<sup>a</sup>Calculated stoichiometry after weighing.

| Example                                                                                                              | NumPy Operation | Formula applied*               | Weighted value |
|----------------------------------------------------------------------------------------------------------------------|-----------------|--------------------------------|----------------|
| Sn <sub>0.972</sub> Bi <sub>0.029</sub> Se <sub>0.97</sub> Br <sub>0.03</sub>                                        | Variance        | Var([WESF(Sn),...,WESF(Br)])   | 0.670371       |
| Na <sub>0.013</sub> Cu <sub>0.002</sub> Sn <sub>0.986</sub> Se                                                       | Sum             | Sum([WESF (Na),..., WESF(Se)]) | 4.496973       |
| Cu <sub>0.015</sub> Sn <sub>0.985</sub> Se                                                                           | Maximum         | Max([WESF(Cu),...,WESF(Se)])   | 2.55           |
| Na <sub>0.026</sub> Cu <sub>0.01</sub> Sn <sub>0.961</sub> Se                                                        | Minimum         | Min([WESF(Na),...,WESF(Se)])   | 0.019547       |
| Na <sub>0.012</sub> Cu <sub>0.008</sub> Sn <sub>0.994</sub> Ge <sub>0.025</sub> Se <sub>0.95</sub> S <sub>0.05</sub> | Average         | Ave([WESF(Na),...,WESF(S)])    | 0.762899       |
| Na <sub>0.03</sub> Sn <sub>0.969</sub> Se                                                                            | Difference      | Diff(Max – Min)                | 2.52202        |

\*With respect to Pauling electronegativity scale.

[] = array

Table S5. Hyperparameters used in feature selection methods.

| <b>ML Algorithm</b>    | <b>Hyperparameter</b>   | <b>Value used</b>  |
|------------------------|-------------------------|--------------------|
| Lasso                  | alpha                   | 0.001              |
|                        | max_iter                | 1000               |
|                        | random_state            | none               |
|                        | selection               | cyclic             |
| XGBoost (XGBRegressor) | base_score              | 0.5                |
|                        | booster                 | gbtree             |
|                        | callbacks               | none               |
|                        | colsample_bylevel       | 1                  |
|                        | colsample_bynode        | 1                  |
|                        | colsample_bytree        | 1                  |
|                        | early_stopping_rounds   | none               |
|                        | enable_categorical      | false              |
|                        | eval_metric             | none               |
|                        | gamma                   | 0                  |
|                        | gpu_id                  | 1                  |
|                        | grow_policy             | depthwise          |
|                        | importance_type         | none               |
|                        | interaction_constraints | none               |
|                        | learning_rate           | 0.3                |
|                        | max_bin                 | 256                |
|                        | max_cat_to_onehot       | 4                  |
|                        | max_delta_step          | 0                  |
|                        | max_depth               | 3                  |
|                        | max_leaves              | 0                  |
|                        | min_child_weight        | 1                  |
|                        | missing                 | nan (not a number) |
|                        | monotone_constraints    | none               |
|                        | n_estimators            | 100                |
|                        | n_jobs                  | 0                  |
|                        | num_parallel_tree       | 1                  |
|                        | predictor               | auto               |
|                        | random_state            | 0                  |
| reg_alpha              | 0                       |                    |
| reg_lambda             | 3                       |                    |

Table S6. Hyperparameters used in different ML models during model selection.

| ML Algorithm                             | Hyperparameter          | Value used         |
|------------------------------------------|-------------------------|--------------------|
| XGBoost (XGBRegressor)                   | base_score              | 0.5                |
|                                          | booster                 | gbtree             |
|                                          | callbacks               | none               |
|                                          | colsample_bylevel       | 1                  |
|                                          | colsample_bynode        | 1                  |
|                                          | colsample_bytree        | 1                  |
|                                          | early_stopping_rounds   | none               |
|                                          | enable_categorical      | false              |
|                                          | eval_metric             | none               |
|                                          | gamma                   | 0                  |
|                                          | gpu_id                  | 1                  |
|                                          | grow_policy             | depthwise          |
|                                          | importance_type         | none               |
|                                          | interaction_constraints | none               |
|                                          | learning_rate           | 0.3                |
|                                          | max_bin                 | 256                |
|                                          | max_cat_to_onehot       | 4                  |
|                                          | max_delta_step          | 0                  |
|                                          | max_depth               | 3                  |
|                                          | max_leaves              | 0                  |
|                                          | min_child_weight        | 1                  |
|                                          | missing                 | nan (not a number) |
|                                          | monotone_constraints    | none               |
|                                          | n_estimators            | 100                |
|                                          | n_jobs                  | 0                  |
|                                          | num_parallel_tree       | 1                  |
|                                          | predictor               | auto               |
|                                          | random_state            | 0                  |
|                                          | reg_alpha               | 0                  |
|                                          | reg_lambda              | 3                  |
| Random Forest<br>(RandomForestRegressor) | bootstrap               | true               |
|                                          | n_estimators            | 100                |
|                                          | max_depth               | 6                  |
|                                          | random_state            | 0                  |
|                                          | verbose                 | 0                  |
|                                          | n_jobs                  | none               |
|                                          | max_features            | 1.0                |

|                          |                          |           |
|--------------------------|--------------------------|-----------|
|                          | min_weight_fraction_leaf | 0.0       |
|                          | min_samples_split        | 2         |
|                          | min_samples_leaf         | 1         |
| <i>k</i> -NN (neighbors) | n_neighbors              | 4         |
|                          | algorithm                | auto      |
|                          | weights                  | uniform   |
|                          | leaf_size                | 30        |
|                          | p                        | 2         |
|                          | metric                   | minkowski |
|                          | n_jobs                   | none      |
| SVM (SVR)                | kernel                   | rbf       |
|                          | C                        | 80        |
|                          | epsilon                  | 0.1       |
|                          | gamma                    | scale     |
|                          | degree                   | 3         |



Table S7. Metrics of ML models of validation sets from k-fold.<sup>6</sup>

| <b>Metrics</b><br><b>Model</b> | <b>Validation Set</b>                                   |                      |                      |                      |                      |                        |
|--------------------------------|---------------------------------------------------------|----------------------|----------------------|----------------------|----------------------|------------------------|
|                                | <b><math>R^2</math></b>                                 |                      |                      |                      |                      |                        |
|                                | <i>k</i> -fold set 1                                    | <i>k</i> -fold set 2 | <i>k</i> -fold set 3 | <i>k</i> -fold set 4 | <i>k</i> -fold set 5 | <i>k</i> -fold average |
| XGboost                        | 0.93                                                    | 0.95                 | 0.95                 | 0.92                 | 0.95                 | 0.94                   |
| RF                             | 0.81                                                    | 0.83                 | 0.87                 | 0.82                 | 0.83                 | 0.83                   |
| SVR                            | 0.85                                                    | 0.85                 | 0.87                 | 0.84                 | 0.84                 | 0.85                   |
| <i>k</i> -NN                   | 0.79                                                    | 0.81                 | 0.81                 | 0.8                  | 0.72                 | 0.79                   |
|                                | <b><math>RMSE</math> (<math>W\ m^{-1}K^{-1}</math>)</b> |                      |                      |                      |                      |                        |
| XGboost                        | 0.06                                                    | 0.05                 | 0.05                 | 0.06                 | 0.04                 | 0.05                   |
| RF                             | 0.10                                                    | 0.10                 | 0.08                 | 0.09                 | 0.08                 | 0.09                   |
| SVR                            | 0.09                                                    | 0.09                 | 0.08                 | 0.08                 | 0.08                 | 0.07                   |
| <i>k</i> -NN                   | 0.10                                                    | 0.10                 | 0.10                 | 0.10                 | 0.10                 | 0.10                   |
|                                | <b><math>MAE</math> (<math>W\ m^{-1}K^{-1}</math>)</b>  |                      |                      |                      |                      |                        |
| XGboost                        | 0.04                                                    | 0.04                 | 0.04                 | 0.04                 | 0.03                 | 0.04                   |
| RF                             | 0.07                                                    | 0.06                 | 0.06                 | 0.06                 | 0.06                 | 0.06                   |
| SVR                            | 0.07                                                    | 0.07                 | 0.06                 | 0.06                 | 0.06                 | 0.06                   |
| <i>k</i> -NN                   | 0.07                                                    | 0.07                 | 0.07                 | 0.07                 | 0.07                 | 0.07                   |

Table S8. Metrics of ML models in training, validation, and test set.<sup>6</sup>

| <b>Metrics</b><br><b>Model</b> | <b>Training</b> |                              |                             | <b>Validation</b> |                              |                             | <b>Test of new data</b> |                              |                             |
|--------------------------------|-----------------|------------------------------|-----------------------------|-------------------|------------------------------|-----------------------------|-------------------------|------------------------------|-----------------------------|
|                                | $R^2$           | $RMSE$ ( $W\ m^{-1}K^{-1}$ ) | $MAE$ ( $W\ m^{-1}K^{-1}$ ) | $R^2$             | $RMSE$ ( $W\ m^{-1}K^{-1}$ ) | $MAE$ ( $W\ m^{-1}K^{-1}$ ) | $R^2$                   | $RMSE$ ( $W\ m^{-1}K^{-1}$ ) | $MAE$ ( $W\ m^{-1}K^{-1}$ ) |
| XGboost                        | 0.99            | 0.03                         | 0.02                        | 0.94              | 0.05                         | 0.04                        | 0.84                    | 0.07                         | 0.05                        |
| RF                             | 0.92            | 0.06                         | 0.05                        | 0.84              | 0.09                         | 0.06                        | 0.81                    | 0.07                         | 0.05                        |
| SVR                            | 0.88            | 0.07                         | 0.06                        | 0.85              | 0.09                         | 0.07                        | 0.70                    | 0.19                         | 0.15                        |
| <i>k</i> -NN                   | 0.88            | 0.07                         | 0.05                        | 0.79              | 0.10                         | 0.07                        | 0.64                    | 0.13                         | 0.10                        |

## References:

- 1 J. Wei, X. Chu, X. Y. Sun, K. Xu, H. X. Deng, J. Chen, Z. Wei and M. Lei, *InfoMat*, 2019, **1**, 338–358.
- 2 T. T. Wong, *Pattern Recognit.*, 2015, **48**, 2839–2846.
- 3 A. Y. T. Wang, R. J. Murdock, S. K. Kauwe, A. O. Oliynyk, A. Gurlo, J. Brgoch, K. A. Persson and T. D. Sparks, *Chem. Mater.*, 2020, **32**, 4954–4965.
- 4 C. Zhou, Y. K. Lee, Y. Yu, S. Byun, Z. Z. Luo, H. Lee, B. Ge, Y. L. Lee, X. Chen, J. Y. Lee, O. Cojocaru-Mirédin, H. Chang, J. Im, S. P. Cho, M. Wuttig, V. P. Dravid, M. G. Kanatzidis and I. Chung, *Nat. Mater.*, 2021, **20**, 1378–1384.
- 5 C. R. Harris, K. J. Millman, S. J. van der Walt, R. Gommers, P. Virtanen, D. Cournapeau, E. Wieser, J. Taylor, S. Berg, N. J. Smith, R. Kern, M. Picus, S. Hoyer, M. H. van Kerkwijk, M. Brett, A. Haldane, J. F. del Río, M. Wiebe, P. Peterson, P. Gérard-Marchant, K. Sheppard, T. Reddy, W. Weckesser, H. Abbasi, C. Gohlke and T. E. Oliphant, *Nature*, 2020, **585**, 357–362.
- 6 D. Chicco, M. J. Warrens and G. Jurman, *PeerJ Comput. Sci.*, 2021, **7**, e623/1-24.
