# Supplementary material for: Experimentally validated machine learning predictions of ultralow thermal conductivity for SnSe materials
Source: Royal Society of Chemistry journal article supplement (doi:10.1039/d3tc01450a), 2023-01-01
Supplement: d3tc01450a3.xlsx [file d3tc01450a3.xlsx]

## Sheet: Training dataset
sample	temperature	measured	predicted		difference measured-predicted	percent error (+underestimated, -overestimated)	absolute percent error
Na0.03Sn0.969Se1	472.15	0.515	0.542534		-0.027534	-5.34641	5.34641
Na0.03Sn0.97Se1	746.85	0.3696	0.368999		0.000601	0.162608	0.162608
Sn0.984Bi0.021Se0.99Br0.01	774	0.483	0.467715		0.015285	3.1646	3.1646
Na0.01Cu0.011Sn0.978Se1	373	0.7584	0.757597		0.000803	0.105881	0.105881
Cu0.022Sn0.98Se1	926	0.112	0.191329		-0.079329	-70.8295	70.8295
Li0.01Cu0.009Sn0.974Se1	523.65	0.5688	0.579744		-0.010944	-1.92405	1.92405
Cu0.022Sn0.98Se1	826	0.1935	0.19834		-0.00484	-2.50129	2.50129
Sn0.94Bi0.061Se0.939Br0.061	578.15	0.554	0.556427		-0.002427	-0.438087	0.438087
Sn1.006Se1	774.15	0.456	0.485592		-0.029592	-6.48947	6.48947
Cu0.011Sn0.991Se1	824	0.1617	0.144527		0.017173	10.6203	10.6203
Na0.028Cu0.01Sn0.963Se1	372.22	0.6854	0.696512		-0.011112	-1.62124	1.62124
Sn0.972Bi0.029Se0.97Br0.03	717	0.3567	0.344479		0.012221	3.42613	3.42613
Cu0.009Sn0.999Se1	926	1.048	0.950772		0.097228	9.27748	9.27748
Na0.01Ag0.01Sn0.981Se1	321.15	0.968	0.947747		0.020253	2.09225	2.09225
Cu0.007Sn0.992Se1	368.82	0.7299	0.746946		-0.017046	-2.33539	2.33539
Cu0.021Sn0.983Se1	469.15	0.67	0.694754		-0.024754	-3.69463	3.69463
Na0.01Cu0.01Sn0.979Se1	423.15	0.695	0.645322		0.049678	7.14791	7.14791
Sn0.94Bi0.061Se0.939Br0.061	760.29	0.4783	0.479965		-0.001665	-0.348108	0.348108
Na0.014Cu0.006Sn0.98Se1	304.17	0.877	0.848568		0.028432	3.24196	3.24196
Cu0.009Sn0.999Se1	372	1.5568	1.48176		0.075037	4.81995	4.81995
Cu0.019Sn0.979Se1	675.15	0.4762	0.466426		0.009774	2.0525	2.0525
Sn0.996Bi0.006Se0.974Br0.026	603	0.6326	0.668303		-0.035703	-5.64385	5.64385
Sn0.983Bi0.006Se0.977Br0.023	412.5	0.5968	0.567679		0.029121	4.87952	4.87952
Sn0.988Bi0.01Se0.98Br0.02	755.775	0.4694	0.488886		-0.019486	-4.15126	4.15126
Na0.029Cu0.002Sn0.969Se1	665.5	0.4858	0.477062		0.008738	1.79868	1.79868
Na0.007Cu0.015Sn0.977Se1	674.15	0.625	0.591646		0.033354	5.33664	5.33664
Cu0.041Sn0.958Se1	320	0.822995	0.828344		-0.005349	-0.649943	0.649943
Na0.03Cu0.008Sn0.962Se1	771.15	0.42	0.419589		0.000411	0.0978571	0.0978571
Sn0.99Bi0.005Se0.989Br0.011	675.15	0.523	0.501156		0.021844	4.17667	4.17667
Na0.01Cu0.01Ag0.01Sn0.98Se1	627.15	0.515	0.498884		0.016116	3.12932	3.12932
Na0.01Cu0.01Ag0.01Sn0.98Se1	573	0.546	0.555836		-0.009836	-1.80147	1.80147
Li0.01Cu0.009Sn0.974Se1	823	0.4766	0.458311		0.018289	3.83739	3.83739
Cu0.078Sn0.918Se1	425.15	0.582	0.542575		0.039425	6.77405	6.77405
Na0.01Sn0.976Au0.01Se1	767	0.424	0.457532		-0.033532	-7.90849	7.90849
Na0.01Cu0.01Sn0.98Se1	775.15	0.3927	0.419794		-0.027094	-6.89941	6.89941
Cu0.005Sn0.998Se1	776	0.29828	0.306212		-0.007932	-2.65925	2.65925
Sn1.002Se1	824.15	0.277	0.298537		-0.021537	-7.77509	7.77509
Na0.007Cu0.015Sn0.977Se1	464.27	0.7578	0.786772		-0.028972	-3.82317	3.82317
Na0.01Cu0.011Sn0.978Se1	673	0.4503	0.456088		-0.005788	-1.28537	1.28537
Na0.014Cu0.006Sn0.98Se1	469.78	0.5762	0.58586		-0.00966	-1.6765	1.6765
Cu0.062Sn0.941Se1	775	0.347	0.34073		0.00627	1.80692	1.80692
Sn0.999Se1	925	0.457	0.483231		-0.026231	-5.73982	5.73982
Na0.015Sn0.985Se1	296	0.72	0.745301		-0.025301	-3.51403	3.51403
Na0.012Cu0.008Sn0.994Ge0.025Se0.95S0.05	515.528	0.4135	0.414842		-0.001342	-0.324547	0.324547
Sn1.002Se1	774	0.3837	0.340923		0.042777	11.1486	11.1486
Cu0.007Sn0.992Se1	660.3	0.5103	0.472062		0.038238	7.49324	7.49324
Na0.03Sn0.969Se1	774	0.464	0.45972		0.00428	0.922414	0.922414
Na0.03Sn0.969Se1	674	0.405	0.345981		0.059019	14.5726	14.5726
Sn0.988Bi0.01Se0.98Br0.02	425.15	0.723	0.679126		0.043874	6.06833	6.06833
Cu0.007Sn0.992Se1	775.15	0.463	0.454876		0.008124	1.75464	1.75464
Sn0.94Bi0.06Se1	297.15	0.886	0.874114		0.011886	1.34153	1.34153
Na0.036Cu0.014Sn0.948Se1	380	0.8379	0.823913		0.013987	1.66929	1.66929
Cu0.022Sn0.98Se1	471	0.438	0.409519		0.028481	6.50251	6.50251
Na0.01Cu0.011Sn0.978Se1	623	0.466	0.476782		-0.010782	-2.31373	2.31373
Na0.013Cu0.002Sn0.986Se1	597	0.46211	0.47616		-0.01405	-3.0404	3.0404
Na0.033Cu0.016Sn0.961Se1	371.11	0.6465	0.658449		-0.011949	-1.84826	1.84826
Na0.025Cu0.006Sn0.968Se1	304.27	0.9093	0.910048		-0.000748	-0.0822611	0.0822611
Na0.014Cu0.006Sn0.98Se1	775	0.402	0.412798		-0.010798	-2.68607	2.68607
Cu0.08Sn0.919Se1	521	0.653	0.651389		0.001611	0.246708	0.246708
Cu0.015Sn0.985Se1	304.18	1.051	1.03817		0.012828	1.22055	1.22055
Sn0.995Bi0.004Se0.992Br0.008	627.15	0.632	0.672805		-0.040805	-6.45649	6.45649
Sn0.976Bi0.011Se0.977Br0.023	765.77	0.495	0.42943		0.06557	13.2465	13.2465
Na0.026Cu0.01Sn0.961Se1	564.153	0.4798	0.473073		0.006727	1.40204	1.40204
Sn1.002Se1	421.15	0.595	0.628461		-0.033461	-5.6237	5.6237
Na0.012Cu0.008Sn0.979Se1	480	0.857	0.838565		0.018435	2.15111	2.15111
Cu0.015Sn0.985Se1	369	0.877	0.875948		0.001052	0.119954	0.119954
Na0.03Sn0.969Se1	724	0.465	0.467874		-0.002874	-0.618065	0.618065
Sn0.952Bi0.045Se0.98Br0.02	774.15	0.539	0.526565		0.012435	2.30705	2.30705
Na0.019Cu0.009Sn0.972Se1	520.06	0.5739	0.56224		0.01166	2.03171	2.03171
Na0.01Cu0.011Sn0.978Se1	293	0.94415	0.948898		-0.004748	-0.502886	0.502886
Sn0.997Bi0.005Se0.97Br0.03	364	0.9479	0.967457		-0.019557	-2.06319	2.06319
Sn0.991Bi0.004Se0.992Br0.008	774.15	0.534	0.521954		0.012046	2.25581	2.25581
Cu0.011Sn0.991Se1	521	0.188762	0.261687		-0.072925	-38.6333	38.6333
Sn0.995Se0.959Br0.041	326	1.1323	1.10725		0.025053	2.21258	2.21258
Na0.01Ag0.01Sn0.981Se1	772	0.39	0.405408		-0.015408	-3.95077	3.95077
Na0.025Cu0.006Sn0.968Se1	620.66	0.4172	0.427866		-0.010666	-2.55657	2.55657
Na0.01Cu0.002Ag0.006Sn0.97Ge0.001Se1	774	0.481	0.475471		0.005529	1.14948	1.14948
Sn0.99Bi0.005Se0.989Br0.011	467.15	0.673	0.672065		0.000935	0.13893	0.13893
Cu0.08Sn0.919Se1	773	0.4776	0.508188		-0.030588	-6.40452	6.40452
Sn0.964Bi0.041Se1	523	0.669	0.67827		-0.00927	-1.38565	1.38565
Sn0.999Se0.94Br0.06	774.15	0.479	0.463609		0.015391	3.21315	3.21315
Cu0.011Sn0.991Se1	371	0.269661	0.309825		-0.040164	-14.8943	14.8943
Na0.01Cu0.01Sn0.98Se1	298	0.99	0.955678		0.034322	3.46687	3.46687
Cu0.019Sn0.979Se1	424.15	0.6606	0.663304		-0.002704	-0.409325	0.409325
Sn0.996Bi0.006Se0.974Br0.026	322.15	1.1683	1.08268		0.085624	7.32894	7.32894
Cu0.078Sn0.918Se1	473.15	0.52	0.482058		0.037942	7.29654	7.29654
Na0.036Cu0.014Sn0.948Se1	640	0.449608	0.489039		-0.039431	-8.77008	8.77008
Na0.03Sn0.97Se1	776.15	0.353	0.340325		0.012675	3.59065	3.59065
Sn0.953Bi0.046Se0.955Br0.045	300.15	0.76	0.79283		-0.03283	-4.31974	4.31974
Cu0.041Sn0.958Se1	773.15	0.46584	0.449097		0.016743	3.59415	3.59415
Na0.021Cu0.003Sn0.978Se1	368.66	0.7973	0.789351		0.007949	0.99699	0.99699
Na0.01Cu0.011Sn0.978Se1	304.64	0.94415	0.919325		0.024825	2.62935	2.62935
Na0.011Cu0.008Sn0.978Se1	665	0.497	0.498642		-0.001642	-0.330382	0.330382
Sn0.964Bi0.041Se1	666.741	0.5698	0.571907		-0.002107	-0.369779	0.369779
Cu0.022Sn0.98Se1	423	0.489	0.419207		0.069793	14.2726	14.2726
Cu0.078Sn0.918Se1	371.15	0.681	0.663596		0.017404	2.55565	2.55565
Na0.03Sn0.97Se1	624.15	0.307	0.325486		-0.018486	-6.0215	6.0215
Cu0.019Sn0.979Se1	826	0.43	0.462852		-0.032852	-7.64	7.64
Na0.01Ag0.011Sn0.974Se1	724	0.4278	0.460455		-0.032655	-7.63324	7.63324
Sn0.99Bi0.005Se0.989Br0.011	323	0.927	0.943137		-0.016137	-1.74078	1.74078
Sn0.983Bi0.006Se0.977Br0.023	516.54	0.4665	0.474337		-0.007837	-1.67996	1.67996
Na0.014Cu0.006Sn0.98Se1	323.166	0.82597	0.836353		-0.010383	-1.25707	1.25707
Na0.01Cu0.01Sn0.979Se1	672.15	0.421	0.421387		-0.000387	-0.091924	0.091924
Sn1.006Se1	811.642	0.479	0.485592		-0.006592	-1.3762	1.3762
Sn0.94Bi0.061Se0.939Br0.061	775.15	0.479	0.457813		0.021187	4.42317	4.42317
Na0.09Cu0.012Ag0.01Sn0.971Se1	475.15	0.466	0.460057		0.005943	1.27532	1.27532
Na0.03Cu0.008Sn0.962Se1	405	0.8263	0.82378		0.00252	0.304974	0.304974
Na0.026Cu0.01Sn0.961Se1	322.35	0.852	0.856864		-0.004864	-0.570892	0.570892
Sn0.997Se1	421.15	0.687	0.66735		0.01965	2.86026	2.86026
Sn1.001Se1	774	0.369	0.379969		-0.010969	-2.97263	2.97263
Na0.025Cu0.005Sn0.969Se1	320.15	0.786	0.797279		-0.011279	-1.43499	1.43499
Na0.01Cu0.01Ag0.01Sn0.98Se1	322.15	0.968	0.986991		-0.018991	-1.96188	1.96188
Na0.01Cu0.01Sn0.979Se1	321	0.826	0.853883		-0.027883	-3.37567	3.37567
Cu0.041Sn0.958Se1	524	0.4969	0.499005		-0.002105	-0.423626	0.423626
Sn0.952Bi0.045Se0.98Br0.02	764.488	0.5356	0.540563		-0.004963	-0.926624	0.926624
Na0.03Sn0.969Se1	574	0.527	0.522976		0.004024	0.763567	0.763567
Sn1.002Se1	523.15	0.48856	0.482885		0.005675	1.16158	1.16158
Na0.029Cu0.002Sn0.969Se1	419.5	0.7382	0.749067		-0.010867	-1.47209	1.47209
Sn1.002Se1	573.15	0.458	0.460896		-0.002896	-0.632314	0.632314
Na0.01Ag0.011Sn0.974Se1	473	0.295	0.344414		-0.049414	-16.7505	16.7505
Sn0.94Bi0.061Se0.939Br0.061	303.15	0.868	0.845601		0.022399	2.58053	2.58053
Sn0.996Bi0.006Se0.974Br0.026	524	0.713	0.736903		-0.023903	-3.35245	3.35245
Na0.013Cu0.002Sn0.986Se1	771.15	0.334	0.37973		-0.04573	-13.6916	13.6916
Sn0.952Bi0.045Se0.98Br0.02	715.301	0.53869	0.552071		-0.013381	-2.48399	2.48399
Na0.026Cu0.01Sn0.961Se1	303.99	0.891	0.885149		0.005851	0.656678	0.656678
Na0.01Cu0.01Sn0.98Se1	773	0.424	0.417636		0.006364	1.50094	1.50094
Na0.014Cu0.012Sn0.973Se1	665.65	0.4944	0.488666		0.005734	1.15979	1.15979
Sn0.984Bi0.021Se0.99Br0.01	295.15	1.025	1.05401		-0.029006	-2.82985	2.82985
Na0.036Cu0.014Sn0.948Se1	303.15	1.03	1.0036		0.026405	2.56359	2.56359
Na0.01Cu0.011Sn0.978Se1	473	0.588	0.565466		0.022534	3.83231	3.83231
Na0.028Cu0.01Sn0.963Se1	323.34	0.7644	0.768986		-0.004586	-0.599948	0.599948
Na0.01Sn0.976Au0.01Se1	916	0.4694	0.475773		-0.006373	-1.35769	1.35769
Sn1.002Se1	471.15	0.5343	0.551186		-0.016886	-3.1604	3.1604
Cu0.041Sn0.958Se1	370	0.6987	0.695187		0.003513	0.502791	0.502791
Na0.021Cu0.005Sn0.974Se1	524	0.524	0.532148		-0.008148	-1.55496	1.55496
Na0.014Cu0.006Sn0.98Se1	617.97	0.4888	0.465682		0.023118	4.72954	4.72954
Na0.025Cu0.006Sn0.968Se1	571.212	0.4614	0.457872		0.003528	0.764629	0.764629
Sn0.985Bi0.005Se0.98Br0.02	471.15	0.686	0.682244		0.003756	0.547522	0.547522
Cu0.009Sn0.999Se1	723	0.878	0.913531		-0.035531	-4.04681	4.04681
Na0.015Sn0.985Se1	663	0.387	0.374197		0.012803	3.30827	3.30827
Cu0.019Sn0.979Se1	473.15	0.599	0.601512		-0.002512	-0.419366	0.419366
Sn0.952Bi0.045Se0.98Br0.02	372.96	0.8495	0.805469		0.044031	5.18317	5.18317
Sn0.997Se1	773	0.412	0.426625		-0.014625	-3.54976	3.54976
Sn1.002Se1	420.15	0.799	0.839558		-0.040558	-5.0761	5.0761
Na0.09Cu0.012Ag0.01Sn0.971Se1	623.15	0.388	0.368654		0.019346	4.98608	4.98608
Na0.01Cu0.01Ag0.01Sn0.98Se1	773	0.437	0.437093		-9.3e-05	-0.0212815	0.0212815
Sn0.999Se1	299	0.752	0.780978		-0.028978	-3.85346	3.85346
Na0.01Cu0.01Sn0.98Se1	524	0.581	0.519119		0.061881	10.6508	10.6508
Na0.025Cu0.005Sn0.969Se1	674	0.4005	0.407736		-0.007236	-1.80674	1.80674
Na0.01Ag0.011Sn0.974Se1	372.15	0.357	0.412097		-0.055097	-15.4333	15.4333
Sn1.006Se1	371.15	0.987	1.0254		-0.038402	-3.89078	3.89078
Sn0.984Bi0.021Se0.99Br0.01	302.32	0.9946	0.994146		0.000454	0.0456465	0.0456465
Na0.011Cu0.008Sn0.978Se1	764.49	0.4551	0.467933		-0.012833	-2.81982	2.81982
Sn0.988Bi0.01Se0.98Br0.02	446	0.6999	0.679126		0.020774	2.96814	2.96814
Na0.01Ag0.01Sn0.981Se1	523	0.565	0.536019		0.028981	5.12938	5.12938
Na0.01Cu0.01Sn0.979Se1	773	0.371	0.385733		-0.014733	-3.97116	3.97116
Cu0.015Sn0.985Se1	711.17	0.60411	0.60026		0.00385	0.637301	0.637301
Sn0.964Bi0.041Se1	624.15	0.611	0.601398		0.009602	1.57152	1.57152
Sn0.996Bi0.006Se0.974Br0.026	725.15	0.546	0.55557		-0.00957	-1.75275	1.75275
Sn0.997Bi0.005Se0.97Br0.03	675.15	0.52	0.509637		0.010363	1.99288	1.99288
Sn0.995Se0.959Br0.041	466	0.7303	0.764401		-0.034101	-4.66945	4.66945
Sn0.982Bi0.026Se0.994Br0.006	451	0.6326	0.627332		0.005268	0.832754	0.832754
Na0.01Ag0.01Sn0.981Se1	423.15	0.687	0.667465		0.019535	2.84352	2.84352
Na0.01Sn0.976Au0.01Se1	873	0.48457	0.477738		0.006832	1.40991	1.40991
Na0.012Cu0.008Sn0.979Se1	340	1.222	1.1373		0.084704	6.93159	6.93159
Na0.025Cu0.006Sn0.968Se1	670.23	0.385	0.401471		-0.016471	-4.27818	4.27818
Na0.01Sn0.976Au0.01Se1	823	0.4997	0.45974		0.03996	7.9968	7.9968
Sn0.972Bi0.029Se0.97Br0.03	577.15	0.38	0.387637		-0.007637	-2.00974	2.00974
Sn1.006Se1	524.15	0.714	0.717086		-0.003086	-0.432213	0.432213
Na0.019Cu0.009Sn0.972Se1	767.7	0.4521	0.444928		0.007172	1.58637	1.58637
Cu0.022Sn0.98Se1	575	0.356	0.28398		0.07202	20.2303	20.2303
Sn0.991Bi0.004Se0.992Br0.008	703.6	0.5508	0.547834		0.002966	0.538489	0.538489
Na0.01Cu0.01Sn0.979Se1	294.15	0.81	0.848495		-0.038495	-4.75247	4.75247
Cu0.009Sn0.999Se1	776	0.832368	0.893123		-0.060755	-7.29906	7.29906
Sn1.001Se1	513.38	0.509	0.498441		0.010559	2.07446	2.07446
Sn0.995Se0.959Br0.041	578.15	0.575	0.57203		0.00297	0.516522	0.516522
Sn0.976Bi0.011Se0.977Br0.023	573	0.572	0.57102		0.00098	0.171329	0.171329
Sn0.982Bi0.02Se0.955Br0.045	522	0.576	0.58931		-0.01331	-2.31076	2.31076
Na0.011Cu0.003Sn0.99Se1	571.43	0.4623	0.446783		0.015517	3.35648	3.35648
Na0.026Cu0.01Sn0.961Se1	662	0.4036	0.417412		-0.013812	-3.4222	3.4222
Sn0.982Bi0.026Se0.994Br0.006	301.19	0.8997	0.916106		-0.016406	-1.8235	1.8235
Cu0.01Sn0.989Se1	576.15	0.504	0.528603		-0.024603	-4.88155	4.88155
Sn0.985Bi0.005Se0.98Br0.02	293.15	1	1.02526		-0.02526	-2.526	2.526
Na0.007Cu0.015Sn0.977Se1	370.92	0.9101	0.920644		-0.010544	-1.15855	1.15855
Na0.014Cu0.012Sn0.973Se1	715.1	0.4709	0.47443		-0.00353	-0.749628	0.749628
Sn0.991Bi0.004Se0.992Br0.008	753.5	0.534	0.544106		-0.010106	-1.89251	1.89251
Sn0.996Bi0.006Se0.974Br0.026	774	0.5462	0.533419		0.012781	2.33999	2.33999
Sn0.983Bi0.006Se0.977Br0.023	652	0.3513	0.351815		-0.000515	-0.146598	0.146598
Na0.09Cu0.012Ag0.01Sn0.971Se1	424.15	0.497	0.516195		-0.019195	-3.86217	3.86217
Na0.011Cu0.003Sn0.99Se1	521.33	0.4994	0.480221		0.019179	3.84041	3.84041
Na0.03Cu0.008Sn0.962Se1	527	0.63	0.621889		0.008111	1.28746	1.28746
Sn0.953Bi0.046Se0.955Br0.045	662.75	0.4611	0.45785		0.00325	0.704836	0.704836
Na0.01Cu0.01Sn0.979Se1	423.15	0.701	0.667419		0.033581	4.79044	4.79044
Sn0.972Bi0.029Se0.97Br0.03	667	0.375	0.369011		0.005989	1.59707	1.59707
Cu0.01Sn0.989Se1	726.15	0.443	0.462401		-0.019401	-4.37946	4.37946
Sn0.94Bi0.06Se1	574.15	0.59	0.592702		-0.002702	-0.457966	0.457966
Na0.014Cu0.006Sn0.98Se1	716.77	0.4504	0.431203		0.019197	4.26221	4.26221
Sn0.983Bi0.006Se0.977Br0.023	482.5	0.5051	0.486911		0.018189	3.60107	3.60107
Na0.013Cu0.002Sn0.986Se1	355	0.813	0.795699		0.017301	2.12804	2.12804
Sn0.995Bi0.004Se0.992Br0.008	528.15	0.739	0.733522		0.005478	0.741272	0.741272
Sn0.964Bi0.041Se1	297.15	1.018	1.03827		-0.020267	-1.99086	1.99086
Na0.01Cu0.011Sn0.978Se1	319	0.8822	0.891691		-0.009491	-1.07583	1.07583
Sn0.995Bi0.004Se0.992Br0.008	426.15	0.94	0.931429		0.008571	0.911809	0.911809
Na0.03Sn0.969Se1	422.15	0.743	0.750817		-0.007817	-1.05209	1.05209
Na0.013Cu0.002Sn0.986Se1	546.09	0.5158	0.555172		-0.039372	-7.63319	7.63319
Cu0.078Sn0.918Se1	672	0.372	0.371315		0.000685	0.18414	0.18414
Cu0.01Sn0.989Se1	424.15	0.6416	0.606479		0.035121	5.47397	5.47397
Na0.01Ag0.01Sn0.98Se1	295	1.032	1.00894		0.023056	2.23411	2.23411
Sn0.995Se0.959Br0.041	775.15	0.475	0.475489		-0.000489	-0.102947	0.102947
Na0.01Cu0.01Ag0.01Sn0.98Se1	372.15	0.812	0.79877		0.01323	1.62931	1.62931
Sn0.995Se0.959Br0.041	663	0.5353	0.523067		0.012233	2.28526	2.28526
Na0.014Cu0.012Sn0.973Se1	517.69	0.5697	0.570721		-0.001021	-0.179217	0.179217
Sn0.984Bi0.021Se0.99Br0.01	551.57	0.5827	0.595728		-0.013028	-2.2358	2.2358
Sn0.976Bi0.011Se0.977Br0.023	470.15	0.68	0.672203		0.007797	1.14662	1.14662
Cu0.019Sn0.979Se1	374.15	0.7527	0.757691		-0.004991	-0.66308	0.66308
Na0.01Ag0.011Sn0.974Se1	774	0.218	0.205519		0.012481	5.72523	5.72523
Cu0.078Sn0.918Se1	572	0.478	0.482521		-0.004521	-0.945816	0.945816
Li0.01Cu0.009Sn0.974Se1	923	0.50737	0.474344		0.033026	6.50925	6.50925
Na0.03Sn0.969Se1	321	0.976	0.909128		0.066872	6.85164	6.85164
Na0.021Cu0.003Sn0.978Se1	465	0.6365	0.626592		0.009908	1.55664	1.55664
Na0.036Cu0.014Sn0.948Se1	723	0.414	0.419022		-0.005022	-1.21304	1.21304
Na0.09Cu0.012Ag0.01Sn0.971Se1	522	0.45	0.438923		0.011077	2.46156	2.46156
Sn0.94Bi0.06Se1	667.156	0.528256	0.544126		-0.01587	-3.00423	3.00423
Cu0.009Sn0.999Se1	420	1.3872	1.38555		0.001646	0.118656	0.118656
Na0.012Cu0.008Sn0.994Ge0.025Se0.95S0.05	624	0.334	0.322049		0.011951	3.57814	3.57814
Sn0.982Bi0.02Se0.955Br0.045	301.15	1.016	0.979679		0.036321	3.5749	3.5749
Cu0.078Sn0.918Se1	773	0.335	0.350513		-0.015513	-4.63075	4.63075
Cu0.08Sn0.919Se1	873.15	0.5413	0.512937		0.028363	5.23979	5.23979
Cu0.015Sn0.985Se1	711	0.604	0.60026		0.00374	0.619205	0.619205
Na0.007Cu0.015Sn0.977Se1	323	1.0273	1.03915		-0.011851	-1.15361	1.15361
Na0.025Cu0.005Sn0.969Se1	624.15	0.431	0.434131		-0.003131	-0.72645	0.72645
Sn1.002Se1	371.15	0.907	0.919075		-0.012075	-1.33131	1.33131
Sn1.006Se1	292.15	1.428	1.34576		0.082244	5.75938	5.75938
Sn1.006Se1	724.15	0.486	0.516797		-0.030797	-6.33683	6.33683
Na0.013Cu0.002Sn0.986Se1	445	0.6527	0.647076		0.005624	0.861652	0.861652
Sn0.996Bi0.006Se0.974Br0.026	508	0.7367	0.745285		-0.008585	-1.16533	1.16533
Na0.01Ag0.01Sn0.998Se1	523	0.5093	0.504039		0.005261	1.03299	1.03299
Sn0.987Bi0.007Se0.984Br0.016	656	0.4749	0.479675		-0.004775	-1.00547	1.00547
Sn1.001Se1	612	0.448	0.442156		0.005844	1.30446	1.30446
Sn0.982Bi0.026Se0.994Br0.006	725	0.444	0.453255		-0.009255	-2.08446	2.08446
Na0.036Cu0.014Sn0.948Se1	575.15	0.562	0.518629		0.043371	7.71726	7.71726
Na0.01Ag0.01Sn0.998Se1	367	0.72538	0.73196		-0.00658	-0.907111	0.907111
Sn0.997Bi0.005Se0.97Br0.03	530.15	0.642	0.618629		0.023371	3.64034	3.64034
Na0.03Sn0.969Se1	369.15	0.67	0.68005		-0.01005	-1.5	1.5
Na0.028Cu0.01Sn0.963Se1	773	0.371	0.368534		0.002466	0.66469	0.66469
Sn0.965Bi0.03Se0.994Br0.006	726	0.462	0.452814		0.009186	1.98831	1.98831
Sn1.006Se1	421.15	0.881	0.862733		0.018267	2.07344	2.07344
Sn0.997Bi0.005Se0.97Br0.03	775	0.488	0.483757		0.004243	0.869467	0.869467
Na0.025Cu0.006Sn0.968Se1	773	0.343	0.385602		-0.042602	-12.4204	12.4204
Na0.025Cu0.006Sn0.968Se1	372.6	0.761	0.743027		0.017973	2.36176	2.36176
Sn1.006Se1	824.15	0.486	0.493566		-0.007566	-1.55679	1.55679
Na0.03Sn0.97Se1	674.15	0.292	0.303319		-0.011319	-3.87637	3.87637
Na0.025Cu0.005Sn0.969Se1	369.15	0.678	0.697272		-0.019272	-2.84248	2.84248
Cu0.009Sn0.999Se1	824	0.924	0.908361		0.015639	1.69253	1.69253
Na0.01Cu0.01Sn0.979Se1	773	0.374	0.400585		-0.026585	-7.10829	7.10829
Sn0.99Bi0.005Se0.989Br0.011	531	0.598	0.628404		-0.030404	-5.08428	5.08428
Cu0.062Sn0.941Se1	725	0.378	0.367387		0.010613	2.80767	2.80767
Na0.01Ag0.01Sn0.981Se1	321	0.809	0.812084		-0.003084	-0.381211	0.381211
Na0.01Ag0.011Sn0.974Se1	923	0.4431	0.453966		-0.010866	-2.45227	2.45227
Na0.01Cu0.01Sn0.98Se1	724	0.439	0.407323		0.031677	7.21572	7.21572
Sn0.995Se0.959Br0.041	297.15	1.226	1.19269		0.033308	2.7168	2.7168
Sn0.987Bi0.007Se0.984Br0.016	757.06	0.447	0.441722		0.005278	1.18076	1.18076
Cu0.011Sn0.991Se1	874	0.1617	0.140999		0.020701	12.8021	12.8021
Cu0.022Sn0.98Se1	875	0.1833	0.165622		0.017678	9.6443	9.6443
Na0.03Cu0.008Sn0.962Se1	453	0.7254	0.7451		-0.0197	-2.71574	2.71574
Na0.033Cu0.016Sn0.961Se1	322.944	0.7056	0.724281		-0.018681	-2.64753	2.64753
Sn0.94Bi0.06Se1	522.15	0.59	0.608388		-0.018388	-3.11661	3.11661
Na0.011Cu0.008Sn0.978Se1	774	0.454	0.467933		-0.013933	-3.06894	3.06894
Na0.021Cu0.003Sn0.978Se1	303.92	0.9255	0.935312		-0.009812	-1.06018	1.06018
Na0.026Cu0.01Sn0.961Se1	773	0.362	0.376218		-0.014218	-3.92762	3.92762
Sn0.965Bi0.03Se0.994Br0.006	385	0.744	0.73335		0.01065	1.43145	1.43145
Na0.011Cu0.008Sn0.978Se1	615	0.525	0.504489		0.020511	3.90686	3.90686
Na0.021Cu0.005Sn0.974Se1	320.15	0.786	0.830753		-0.044753	-5.69377	5.69377
Sn0.988Bi0.01Se0.98Br0.02	332	0.9213	0.947771		-0.026471	-2.87322	2.87322
Sn0.952Bi0.045Se0.98Br0.02	574	0.614	0.615146		-0.001146	-0.186645	0.186645
Na0.03Cu0.008Sn0.962Se1	711	0.4365	0.436062		0.000438	0.100344	0.100344
Sn0.997Bi0.005Se0.97Br0.03	453.46	0.7468	0.74538		0.00142	0.190145	0.190145
Sn0.99Bi0.005Se0.989Br0.011	366.15	0.808	0.794943		0.013057	1.61597	1.61597
Sn0.94Bi0.06Se1	667.743	0.5281	0.544126		-0.016026	-3.03465	3.03465
Na0.014Cu0.006Sn0.98Se1	766.213	0.4207	0.41932		0.00138	0.328025	0.328025
Sn0.988Bi0.01Se0.98Br0.02	296.15	1.024	1.03112		-0.007123	-0.695605	0.695605
Na0.01Ag0.01Sn0.981Se1	672.15	0.453	0.440206		0.012794	2.82428	2.82428
Na0.033Cu0.016Sn0.961Se1	617.84	0.4311	0.426873		0.004227	0.980515	0.980515
Cu0.022Sn0.98Se1	775	0.203	0.190365		0.012635	6.22414	6.22414
Na0.019Cu0.009Sn0.972Se1	301.5	0.9617	0.951944		0.009756	1.01445	1.01445
Sn0.99Bi0.005Se0.989Br0.011	298.15	0.987	0.990964		-0.003964	-0.401621	0.401621
Cu0.021Sn0.983Se1	571	0.514	0.531348		-0.017348	-3.3751	3.3751
Na0.01Cu0.011Sn0.978Se1	324.54	0.8822	0.874957		0.007243	0.821016	0.821016
Cu0.041Sn0.958Se1	574	0.48137	0.491964		-0.010594	-2.2008	2.2008
Na0.01Cu0.01Sn0.98Se1	299.15	0.879	0.893755		-0.014755	-1.67861	1.67861
Na0.011Cu0.008Sn0.978Se1	468.155	0.677	0.699463		-0.022463	-3.31802	3.31802
Na0.007Cu0.015Sn0.977Se1	304.43	1.084	1.06626		0.017739	1.63644	1.63644
Na0.012Cu0.008Sn0.994Ge0.025Se0.95S0.05	421	0.5249	0.519823		0.005077	0.967232	0.967232
Na0.01Sn0.976Au0.01Se1	370	0.8783	0.842692		0.035608	4.0542	4.0542
Cu0.062Sn0.941Se1	875	0.252508	0.303357		-0.050849	-20.1376	20.1376
Cu0.041Sn0.958Se1	522.15	0.5745	0.545315		0.029185	5.08007	5.08007
Sn0.995Bi0.004Se0.992Br0.008	574	0.693	0.683156		0.009844	1.42049	1.42049
Na0.01Ag0.01Sn0.998Se1	873	0.4167	0.414088		0.002612	0.62683	0.62683
Na0.028Cu0.01Sn0.963Se1	768.15	0.3767	0.368534		0.008166	2.16777	2.16777
Na0.013Cu0.002Sn0.986Se1	399.11	0.7309	0.709754		0.021146	2.89315	2.89315
Sn0.999Se1	523	0.692	0.658735		0.033265	4.80708	4.80708
Sn1.002Se1	724.15	0.3969	0.39252		0.00438	1.10355	1.10355
Na0.025Cu0.006Sn0.968Se1	471.886	0.5867	0.600029		-0.013329	-2.27186	2.27186
Sn0.983Bi0.006Se0.977Br0.023	321.29	0.741	0.799063		-0.058063	-7.83576	7.83576
Sn0.999Se1	773	0.317	0.272595		0.044405	14.0079	14.0079
Na0.02Cu0.015Sn0.965Se1	367	0.7652	0.772291		-0.007091	-0.926686	0.926686
Na0.01Cu0.002Ag0.006Sn0.97Ge0.001Se1	726.15	0.497	0.487702		0.009298	1.87082	1.87082
Sn0.997Bi0.005Se0.97Br0.03	296.15	1.177	1.2058		-0.028797	-2.44664	2.44664
Na0.03Sn0.97Se1	442.14	0.599	0.591463		0.007537	1.25826	1.25826
Na0.01Ag0.011Sn0.974Se1	873	0.4584	0.455932		0.002468	0.538394	0.538394
Na0.03Cu0.008Sn0.962Se1	763.29	0.4312	0.419589		0.011611	2.69272	2.69272
Cu0.078Sn0.918Se1	774	0.414	0.399395		0.014605	3.52778	3.52778
Cu0.01Sn0.989Se1	525.15	0.5347	0.536132		-0.001432	-0.267814	0.267814
Sn0.983Bi0.006Se0.977Br0.023	774.15	0.302	0.307648		-0.005648	-1.8702	1.8702
Sn0.99Bi0.005Se0.989Br0.011	575	0.568	0.578038		-0.010038	-1.76725	1.76725
Sn0.997Se1	723.15	0.473	0.436762		0.036238	7.66131	7.66131
Cu0.01Sn0.989Se1	775	0.4277	0.462401		-0.034701	-8.1134	8.1134
Na0.021Cu0.003Sn0.978Se1	709	0.3958	0.419585		-0.023785	-6.00935	6.00935
Na0.01Ag0.01Sn0.998Se1	824	0.4167	0.422817		-0.006117	-1.46796	1.46796
Na0.025Cu0.005Sn0.969Se1	524	0.524	0.495317		0.028683	5.47385	5.47385
Na0.02Cu0.015Sn0.965Se1	658.85	0.5078	0.500099		0.007701	1.51654	1.51654
Na0.01Ag0.011Sn0.974Se1	471	0.7029	0.675249		0.027651	3.93385	3.93385
Na0.012Cu0.008Sn0.979Se1	680	0.427	0.567367		-0.140367	-32.8728	32.8728
Na0.011Cu0.008Sn0.978Se1	725.15	0.485	0.476087		0.008913	1.83773	1.83773
Sn1.002Se1	369.15	0.68705	0.718039		-0.030989	-4.51044	4.51044
Na0.01Ag0.011Sn0.974Se1	724	0.2331	0.21775		0.01535	6.58516	6.58516
Cu0.041Sn0.958Se1	577	0.5124	0.52447		-0.01207	-2.35558	2.35558
Na0.01Cu0.01Sn0.98Se1	823.15	0.487	0.44369		0.04331	8.89322	8.89322
Sn0.997Se1	923	0.473	0.452915		0.020085	4.2463	4.2463
Sn0.982Bi0.02Se0.955Br0.045	423.15	0.713	0.691846		0.021154	2.9669	2.9669
Na0.01Cu0.011Sn0.978Se1	424.246	0.65	0.657082		-0.007082	-1.08954	1.08954
Sn0.999Se0.94Br0.06	296.15	0.974	0.986738		-0.012738	-1.3078	1.3078
Sn0.999Se0.94Br0.06	422.15	0.68	0.69865		-0.01865	-2.74265	2.74265
Na0.02Cu0.015Sn0.965Se1	463.26	0.6255	0.633549		-0.008049	-1.28681	1.28681
Cu0.041Sn0.958Se1	675	0.4503	0.465571		-0.015271	-3.39129	3.39129
Cu0.01Sn0.989Se1	925	0.535	0.501975		0.033025	6.1729	6.1729
Na0.02Cu0.015Sn0.965Se1	511.24	0.582	0.572606		0.009394	1.61409	1.61409
Na0.015Sn0.985Se1	471	0.4745	0.518921		-0.044421	-9.36164	9.36164
Na0.007Cu0.015Sn0.977Se1	512.85	0.7104	0.690409		0.019991	2.81405	2.81405
Na0.03Cu0.008Sn0.962Se1	711.76	0.4365	0.436062		0.000438	0.100344	0.100344
Na0.013Cu0.002Sn0.986Se1	300.13	0.9279	0.898797		0.029103	3.13644	3.13644
Na0.026Cu0.01Sn0.961Se1	663.14	0.4033	0.417412		-0.014112	-3.49913	3.49913
Na0.012Cu0.008Sn0.994Ge0.025Se0.95S0.05	419	0.5408	0.552372		-0.011572	-2.13979	2.13979
Sn0.991Bi0.004Se0.992Br0.008	321.98	1.036	1.02123		0.014768	1.42548	1.42548
Sn0.976Bi0.011Se0.977Br0.023	298	0.989	0.989252		-0.000252	-0.0254803	0.0254803
Na0.014Cu0.006Sn0.98Se1	371.44	0.717	0.746689		-0.029689	-4.14073	4.14073
Sn0.996Bi0.006Se0.974Br0.026	293.15	1.3049	1.2654		0.039498	3.0269	3.0269
Sn1.002Se1	825	0.427	0.396632		0.030368	7.11194	7.11194
Cu0.007Sn0.992Se1	709	0.4968	0.469254		0.027546	5.54469	5.54469
Sn1.001Se1	322.87	0.792	0.791213		0.000787	0.0993687	0.0993687
Na0.01Ag0.01Sn0.98Se1	724.15	0.36	0.421677		-0.061677	-17.1325	17.1325
Sn0.995Se0.959Br0.041	517	0.652	0.685071		-0.033071	-5.07224	5.07224
Cu0.011Sn0.991Se1	924	0.1617	0.152819		0.008881	5.49227	5.49227
Na0.02Cu0.015Sn0.965Se1	415	0.6851	0.68889		-0.00379	-0.553204	0.553204
Na0.021Cu0.003Sn0.978Se1	660.87	0.425	0.436217		-0.011217	-2.63929	2.63929
Sn0.997Bi0.005Se0.97Br0.03	323	1.0734	1.08185		-0.008448	-0.787032	0.787032
Sn0.972Bi0.029Se0.97Br0.03	301.15	0.775	0.804953		-0.029953	-3.8649	3.8649
Sn0.999Se0.94Br0.06	575.15	0.603	0.586248		0.016752	2.77811	2.77811
Na0.029Cu0.002Sn0.969Se1	616.077	0.5211	0.517153		0.003947	0.757436	0.757436
Na0.021Cu0.003Sn0.978Se1	773	0.371	0.393705		-0.022705	-6.11995	6.11995
Sn0.985Bi0.005Se0.98Br0.02	523.15	0.6	0.621594		-0.021594	-3.599	3.599
Sn0.987Bi0.007Se0.984Br0.016	605.8	0.5017	0.536306		-0.034606	-6.89775	6.89775
Li0.01Cu0.009Sn0.974Se1	324.856	0.98399	0.929103		0.054887	5.578	5.578
Na0.013Cu0.002Sn0.986Se1	494.9	0.5802	0.583059		-0.002859	-0.492761	0.492761
Na0.01Ag0.011Sn0.974Se1	421	0.8098	0.765326		0.044474	5.49197	5.49197
Sn0.999Se0.94Br0.06	664.06	0.514	0.517038		-0.003038	-0.591051	0.591051
Na0.021Cu0.003Sn0.978Se1	512.75	0.5715	0.528037		0.043463	7.60507	7.60507
Cu0.009Sn0.999Se1	572	1.048	1.08244		-0.034441	-3.28635	3.28635
Cu0.019Sn0.979Se1	826.15	0.46089	0.462852		-0.001962	-0.425698	0.425698
Na0.033Cu0.016Sn0.961Se1	667	0.4056	0.404569		0.001031	0.254191	0.254191
Sn0.988Bi0.01Se0.98Br0.02	475.07	0.6563	0.664429		-0.008129	-1.23861	1.23861
Na0.015Sn0.985Se1	322.97	0.6623	0.687599		-0.025299	-3.81987	3.81987
Na0.01Ag0.01Sn0.98Se1	571	0.547	0.561003		-0.014003	-2.55996	2.55996
Sn0.965Bi0.03Se0.994Br0.006	504.04	0.5924	0.596615		-0.004215	-0.711512	0.711512
Cu0.078Sn0.918Se1	299	0.867	0.855529		0.011471	1.32307	1.32307
Sn0.965Bi0.03Se0.994Br0.006	345	0.8094	0.856098		-0.046698	-5.76946	5.76946
Li0.01Cu0.009Sn0.974Se1	769	0.4304	0.449581		-0.019181	-4.45655	4.45655
Cu0.019Sn0.979Se1	576.15	0.5069	0.523322		-0.016422	-3.23969	3.23969
Sn0.987Bi0.007Se0.984Br0.016	300.87	0.99024	0.999153		-0.008913	-0.900085	0.900085
Na0.012Cu0.008Sn0.994Ge0.025Se0.95S0.05	663	0.3022	0.305168		-0.002968	-0.982131	0.982131
Na0.029Cu0.002Sn0.969Se1	370.37	0.8117	0.803893		0.007807	0.961809	0.961809
Sn0.972Bi0.029Se0.97Br0.03	422.2	0.5248	0.517591		0.007209	1.37367	1.37367
Sn0.94Bi0.06Se1	421.15	0.679	0.682461		-0.003461	-0.50972	0.50972
Na0.028Cu0.01Sn0.963Se1	520	0.5006	0.505742		-0.005142	-1.02717	1.02717
Na0.02Cu0.015Sn0.965Se1	321.69	0.8663	0.88634		-0.02004	-2.31329	2.31329
Sn0.94Bi0.061Se0.939Br0.061	612.908	0.52022	0.514609		0.005611	1.07858	1.07858
Cu0.015Sn0.985Se1	760.85	0.5695	0.583672		-0.014172	-2.4885	2.4885
Na0.01Cu0.01Sn0.979Se1	624.15	0.467	0.431325		0.035675	7.63919	7.63919
Na0.09Cu0.012Ag0.01Sn0.971Se1	321.15	0.683	0.661151		0.021849	3.19898	3.19898
Sn0.982Bi0.02Se0.955Br0.045	522.15	0.576	0.58931		-0.01331	-2.31076	2.31076
Na0.01Ag0.011Sn0.974Se1	824	0.4584	0.455932		0.002468	0.538394	0.538394
Na0.03Sn0.97Se1	694	0.3855	0.391097		-0.005597	-1.45188	1.45188
Sn0.997Bi0.005Se0.97Br0.03	549	0.6218	0.617048		0.004752	0.764233	0.764233
Sn0.976Bi0.011Se0.977Br0.023	370.15	0.819	0.825537		-0.006537	-0.798168	0.798168
Na0.01Cu0.002Ag0.006Sn0.97Ge0.001Se1	295	1.211	1.20819		0.002811	0.232122	0.232122
Cu0.078Sn0.918Se1	526	0.471	0.494372		-0.023372	-4.96221	4.96221
Na0.03Sn0.97Se1	396	0.6617	0.669034		-0.007334	-1.10836	1.10836
Na0.014Cu0.012Sn0.973Se1	764.61	0.4368	0.457957		-0.021157	-4.84364	4.84364
Sn1.001Se1	301.95	0.844	0.837986		0.006014	0.712559	0.712559
Na0.03Sn0.97Se1	310	0.7996	0.827294		-0.027694	-3.46348	3.46348
Cu0.062Sn0.941Se1	825	0.331	0.336075		-0.005075	-1.53323	1.53323
Sn0.953Bi0.046Se0.955Br0.045	723.15	0.449	0.428453		0.020547	4.57617	4.57617
Sn1.001Se1	465	0.555	0.586842		-0.031842	-5.7373	5.7373
Cu0.021Sn0.983Se1	372.15	0.873	0.795128		0.077872	8.92005	8.92005
Na0.012Cu0.008Sn0.994Ge0.025Se0.95S0.05	300	0.684	0.685271		-0.001271	-0.185819	0.185819
Sn0.985Bi0.005Se0.98Br0.02	371.15	0.815	0.807424		0.007576	0.929571	0.929571
Na0.01Ag0.011Sn0.974Se1	295	0.41975	0.424876		-0.005126	-1.2212	1.2212
Na0.03Sn0.97Se1	774	0.261	0.273066		-0.012066	-4.62299	4.62299
Na0.01Cu0.011Sn0.978Se1	621.709	0.464	0.463824		0.000176	0.037931	0.037931
Sn1.001Se1	416	0.615	0.635412		-0.020412	-3.31902	3.31902
Na0.011Cu0.003Sn0.99Se1	471	0.5421	0.51185		0.03025	5.58015	5.58015
Cu0.021Sn0.983Se1	773	0.358	0.382879		-0.024879	-6.94944	6.94944
Sn0.985Bi0.005Se0.98Br0.02	421	0.715	0.735252		-0.020252	-2.83245	2.83245
Sn0.99Bi0.005Se0.989Br0.011	727	0.508	0.497427		0.010573	2.0813	2.0813
Cu0.078Sn0.918Se1	304	0.78	0.823714		-0.043714	-5.60436	5.60436
Na0.03Sn0.969Se1	524	0.573	0.599777		-0.026777	-4.67312	4.67312
Na0.012Cu0.008Sn0.994Ge0.025Se0.95S0.05	673	0.3022	0.305694		-0.003494	-1.15619	1.15619
Cu0.011Sn0.991Se1	773	0.134	0.123923		0.010077	7.52015	7.52015
Na0.029Cu0.002Sn0.969Se1	715.245	0.4582	0.455432		0.002768	0.604103	0.604103
Sn0.999Se0.94Br0.06	862.78	0.487	0.481837		0.005163	1.06016	1.06016
Na0.01Ag0.01Sn0.98Se1	371.15	0.928	0.877224		0.050776	5.47155	5.47155
Na0.028Cu0.01Sn0.963Se1	471.77	0.6145	0.59473		0.01977	3.21725	3.21725
Sn0.995Bi0.004Se0.992Br0.008	298	1.34	1.29228		0.047718	3.56104	3.56104
Sn0.94Bi0.061Se0.939Br0.061	662.01	0.5021	0.504396		-0.002296	-0.457279	0.457279
Na0.012Cu0.008Sn0.979Se1	523.15	0.759	0.77481		-0.01581	-2.083	2.083
Cu0.021Sn0.983Se1	725.15	0.39	0.397706		-0.007706	-1.9759	1.9759
Na0.01Cu0.011Sn0.978Se1	523.07	0.5417	0.542174		-0.000474	-0.0875023	0.0875023
Sn0.991Bi0.004Se0.992Br0.008	550.3	0.6494	0.631022		0.018378	2.83	2.83
Sn0.99Bi0.005Se0.989Br0.011	759.17	0.50696	0.497427		0.009533	1.88042	1.88042
Na0.01Cu0.011Sn0.978Se1	421	0.6522	0.681494		-0.029294	-4.49157	4.49157
Na0.029Cu0.002Sn0.969Se1	322.701	0.8903	0.922401		-0.032101	-3.60564	3.60564
Na0.007Cu0.015Sn0.977Se1	465.56	0.7563	0.786772		-0.030472	-4.02909	4.02909
Na0.01Cu0.011Sn0.978Se1	572.8	0.526	0.519208		0.006792	1.29125	1.29125
Sn0.982Bi0.026Se0.994Br0.006	753.11	0.4526	0.453255		-0.000655	-0.144719	0.144719
Cu0.041Sn0.958Se1	294	0.8385	0.833715		0.004785	0.570662	0.570662
Na0.012Cu0.008Sn0.994Ge0.025Se0.95S0.05	772	0.334	0.333164		0.000836	0.250299	0.250299
Na0.033Cu0.016Sn0.961Se1	568.21	0.4627	0.446989		0.015711	3.3955	3.3955
Na0.01Cu0.011Sn0.978Se1	667	0.4489	0.451127		-0.002227	-0.496102	0.496102
Na0.01Cu0.002Ag0.006Sn0.97Ge0.001Se1	774.15	0.481	0.475471		0.005529	1.14948	1.14948
Cu0.062Sn0.941Se1	524	0.647051	0.584857		0.062194	9.61192	9.61192
Na0.012Cu0.008Sn0.994Ge0.025Se0.95S0.05	622	0.318	0.322049		-0.004049	-1.27327	1.27327
Na0.01Cu0.01Sn0.98Se1	674.15	0.471	0.437548		0.033452	7.10234	7.10234
Cu0.041Sn0.958Se1	624.15	0.5279	0.504026		0.023874	4.52245	4.52245
Na0.036Cu0.014Sn0.948Se1	775.15	0.406	0.432123		-0.026123	-6.43424	6.43424
Na0.011Cu0.003Sn0.99Se1	673	0.353	0.365245		-0.012245	-3.46884	3.46884
Cu0.041Sn0.958Se1	623	0.4503	0.451638		-0.001338	-0.297135	0.297135
Sn0.965Bi0.03Se0.994Br0.006	553	0.5476	0.574492		-0.026892	-4.91088	4.91088
Na0.03Cu0.008Sn0.962Se1	357.7	0.9433	0.932368		0.010932	1.15891	1.15891
Sn0.972Bi0.029Se0.97Br0.03	519	0.4327	0.446195		-0.013495	-3.11879	3.11879
Na0.02Cu0.015Sn0.965Se1	758.02	0.4634	0.468988		-0.005588	-1.20587	1.20587
Na0.01Ag0.01Sn0.998Se1	774.15	0.3858	0.404286		-0.018486	-4.7916	4.7916
Sn1.001Se1	626.15	0.461	0.437839		0.023161	5.02408	5.02408
Cu0.019Sn0.979Se1	875.15	0.4979	0.468538		0.029362	5.89717	5.89717
Sn0.987Bi0.007Se0.984Br0.016	685	0.463	0.450042		0.012958	2.7987	2.7987
Na0.036Cu0.014Sn0.948Se1	750	0.4119	0.433729		-0.021829	-5.29959	5.29959
Na0.03Sn0.97Se1	322	0.722	0.667223		0.054777	7.58684	7.58684
Cu0.041Sn0.958Se1	299.15	0.978	0.971017		0.006983	0.714008	0.714008
Na0.012Cu0.008Sn0.994Ge0.025Se0.95S0.05	369	0.58856	0.594358		-0.005798	-0.985116	0.985116
Sn0.985Bi0.005Se0.98Br0.02	724	0.486	0.441417		0.044583	9.17346	9.17346
Cu0.078Sn0.918Se1	725.15	0.347	0.358668		-0.011668	-3.36254	3.36254
Na0.01Cu0.01Sn0.98Se1	624.15	0.456	0.479575		-0.023575	-5.16996	5.16996
Na0.01Cu0.01Sn0.979Se1	321	0.819	0.829294		-0.010294	-1.2569	1.2569
Sn0.987Bi0.007Se0.984Br0.016	635	0.485	0.489669		-0.004669	-0.96268	0.96268
Cu0.041Sn0.958Se1	471	0.5435	0.538115		0.005385	0.9908	0.9908
Na0.012Cu0.008Sn0.979Se1	774.15	0.648	0.597656		0.050344	7.76914	7.76914
Sn0.976Bi0.011Se0.977Br0.023	526	0.618	0.596981		0.021019	3.40113	3.40113
Cu0.009Sn0.999Se1	472	1.248	1.26953		-0.021529	-1.72508	1.72508
Na0.015Sn0.985Se1	673.15	0.337	0.374197		-0.037197	-11.0377	11.0377
Sn0.984Bi0.021Se0.99Br0.01	470.15	0.664	0.674481		-0.010481	-1.57846	1.57846
Sn0.952Bi0.045Se0.98Br0.02	473.15	0.719	0.702531		0.016469	2.29054	2.29054
Sn0.964Bi0.041Se1	725.15	0.552	0.515634		0.036366	6.58804	6.58804
Na0.033Cu0.016Sn0.961Se1	303.74	0.7307	0.762988		-0.032288	-4.41878	4.41878
Sn0.988Bi0.01Se0.98Br0.02	775	0.465	0.466734		-0.001734	-0.372903	0.372903
Sn0.984Bi0.021Se0.99Br0.01	704	0.4937	0.498186		-0.004486	-0.908649	0.908649
Na0.01Cu0.01Ag0.01Sn0.98Se1	295.15	1.03	1.03973		-0.009726	-0.944272	0.944272
Na0.03Sn0.969Se1	675.15	0.465	0.486677		-0.021677	-4.66172	4.66172
Na0.011Cu0.008Sn0.978Se1	322.15	0.908	0.936659		-0.028659	-3.15628	3.15628
Sn0.997Bi0.005Se0.97Br0.03	751.439	0.4893	0.505909		-0.016609	-3.39444	3.39444
Cu0.007Sn0.992Se1	512.14	0.5673	0.552783		0.014517	2.55896	2.55896
Cu0.007Sn0.992Se1	322	0.8222	0.870827		-0.048627	-5.91425	5.91425
Na0.01Ag0.01Sn0.981Se1	370.15	0.827	0.825244		0.001756	0.212334	0.212334
Na0.03Sn0.97Se1	524	0.399	0.401927		-0.002927	-0.733584	0.733584
Sn0.982Bi0.026Se0.994Br0.006	500.07	0.5792	0.558589		0.020611	3.55853	3.55853
Na0.025Cu0.005Sn0.969Se1	424.15	0.585	0.62138		-0.03638	-6.2188	6.2188
Na0.03Sn0.97Se1	490	0.5411	0.497752		0.043348	8.01109	8.01109
Sn0.953Bi0.046Se0.955Br0.045	419.23	0.6225	0.616895		0.005605	0.900402	0.900402
Na0.007Cu0.015Sn0.977Se1	774	0.6014	0.551334		0.050066	8.32491	8.32491
Sn0.996Bi0.006Se0.974Br0.026	552	0.6878	0.70495		-0.01715	-2.49346	2.49346
Sn0.94Bi0.061Se0.939Br0.061	711.38	0.4887	0.483318		0.005382	1.10129	1.10129
Cu0.011Sn0.991Se1	673	0.148	0.129957		0.018043	12.1912	12.1912
Na0.01Cu0.011Sn0.978Se1	522	0.5435	0.536832		0.006668	1.22686	1.22686
Cu0.01Sn0.989Se1	825.15	0.4736	0.483005		-0.009405	-1.98585	1.98585
Sn0.972Bi0.029Se0.97Br0.03	775.15	0.338	0.328005		0.009995	2.9571	2.9571
Na0.014Cu0.012Sn0.973Se1	370.85	0.7924	0.80249		-0.01009	-1.27335	1.27335
Na0.01Ag0.01Sn0.981Se1	624.15	0.458	0.452991		0.005009	1.09367	1.09367
Sn0.984Bi0.021Se0.99Br0.01	754.546	0.4915	0.489867		0.001633	0.332248	0.332248
Na0.025Cu0.006Sn0.968Se1	422.43	0.6674	0.637166		0.030234	4.53012	4.53012
Na0.012Cu0.008Sn0.994Ge0.025Se0.95S0.05	520	0.445	0.435593		0.009407	2.11393	2.11393
Cu0.01Sn0.989Se1	371.15	0.7485	0.722277		0.026223	3.50341	3.50341
Na0.014Cu0.006Sn0.98Se1	518.79	0.536	0.522621		0.013379	2.49608	2.49608
Sn0.94Bi0.061Se0.939Br0.061	466.757	0.622072	0.63591		-0.013838	-2.2245	2.2245
Sn0.988Bi0.01Se0.98Br0.02	304	0.9878	0.971981		0.015819	1.60144	1.60144
Na0.01Cu0.01Sn0.98Se1	873	0.456	0.44369		0.01231	2.69956	2.69956
Na0.014Cu0.012Sn0.973Se1	616.4	0.5141	0.490415		0.023685	4.60708	4.60708
Na0.012Cu0.008Sn0.994Ge0.025Se0.95S0.05	672	0.334	0.360437		-0.026437	-7.91527	7.91527
Sn0.965Bi0.03Se0.994Br0.006	757.9	0.4777	0.452814		0.024886	5.20955	5.20955
Na0.03Sn0.97Se1	298	0.8203	0.850602		-0.030302	-3.69401	3.69401
Na0.01Cu0.01Sn0.98Se1	472.15	0.502	0.520469		-0.018469	-3.67908	3.67908
Sn1.002Se1	624.15	0.4427	0.442697		3e-06	0.00067766	0.00067766
Na0.03Sn0.97Se1	353	0.7272	0.749659		-0.022459	-3.08842	3.08842
Sn0.991Bi0.004Se0.992Br0.008	652.4	0.5745	0.573755		0.000745	0.129678	0.129678
Na0.019Cu0.009Sn0.972Se1	771	0.441	0.444928		-0.003928	-0.890703	0.890703
Na0.021Cu0.003Sn0.978Se1	562	0.5131	0.500243		0.012857	2.50575	2.50575
Na0.03Sn0.97Se1	473.15	0.461	0.468805		-0.007805	-1.69306	1.69306
Na0.01Cu0.002Ag0.006Sn0.97Ge0.001Se1	367.15	0.947	0.94438		0.00262	0.276663	0.276663
Na0.01Cu0.01Sn0.98Se1	422.15	0.644	0.695647		-0.051647	-8.01972	8.01972
Sn0.995Bi0.004Se0.992Br0.008	469.15	0.863	0.901069		-0.038069	-4.41124	4.41124
Na0.01Cu0.011Sn0.978Se1	522	0.541727	0.524695		0.017032	3.14402	3.14402
Sn0.987Bi0.007Se0.984Br0.016	774.15	0.447	0.419571		0.027429	6.13624	6.13624
Na0.03Sn0.969Se1	523	0.468	0.489785		-0.021785	-4.65491	4.65491
Na0.015Sn0.985Se1	418.49	0.5584	0.533967		0.024433	4.37554	4.37554
Cu0.08Sn0.919Se1	297	1.225	1.18763		0.037367	3.05037	3.05037
Cu0.01Sn0.989Se1	474.15	0.5805	0.589989		-0.009489	-1.63463	1.63463
Na0.015Sn0.985Se1	613	0.4107	0.392043		0.018657	4.54273	4.54273
Na0.01Ag0.011Sn0.974Se1	321	0.404	0.404869		-0.000869	-0.215099	0.215099
Sn0.997Se1	625.15	0.472	0.494177		-0.022177	-4.69852	4.69852
Sn0.972Bi0.029Se0.97Br0.03	470.753	0.4699	0.500047		-0.030147	-6.41562	6.41562
Na0.01Sn0.976Au0.01Se1	923	0.4694	0.475773		-0.006373	-1.35769	1.35769
Na0.01Cu0.01Sn0.98Se1	371.15	0.675	0.757034		-0.082034	-12.1532	12.1532
Sn1.002Se1	522.15	0.63	0.577358		0.052642	8.35587	8.35587
Sn1.002Se1	874.15	0.246	0.280654		-0.034654	-14.087	14.087
Na0.026Cu0.01Sn0.961Se1	712	0.3817	0.392692		-0.010992	-2.87975	2.87975
Sn0.995Bi0.004Se0.992Br0.008	675	0.616	0.627617		-0.011617	-1.88588	1.88588
Na0.03Sn0.97Se1	591.86	0.4454	0.428864		0.016536	3.71262	3.71262
Na0.007Cu0.015Sn0.977Se1	416.55	0.824	0.847022		-0.023022	-2.79393	2.79393
Cu0.015Sn0.985Se1	513.57	0.6878	0.681421		0.006379	0.92745	0.92745
Sn1.002Se1	774.15	0.292	0.298605		-0.006605	-2.26199	2.26199
Sn1.002Se1	292.15	1.245	1.25648		-0.011477	-0.921847	0.921847
Na0.029Cu0.002Sn0.969Se1	764.984	0.4385	0.428673		0.009827	2.24105	2.24105
Sn0.985Bi0.005Se0.98Br0.02	623	0.529	0.509189		0.019811	3.74499	3.74499
Cu0.019Sn0.979Se1	926	0.507	0.494188		0.012812	2.52702	2.52702
Na0.011Cu0.008Sn0.978Se1	522.15	0.642	0.598692		0.043308	6.74579	6.74579
Na0.026Cu0.01Sn0.961Se1	369	0.7591	0.750819		0.008281	1.0909	1.0909
Na0.011Cu0.003Sn0.99Se1	304.05	0.7302	0.79585		-0.06565	-8.99069	8.99069
Na0.019Cu0.009Sn0.972Se1	421.49	0.7163	0.714086		0.002214	0.309088	0.309088
Na0.02Cu0.015Sn0.965Se1	775	0.46	0.460833		-0.000833	-0.181087	0.181087
Na0.019Cu0.009Sn0.972Se1	718	0.4494	0.456436		-0.007036	-1.56564	1.56564
Sn0.983Bi0.006Se0.977Br0.023	702.89	0.3242	0.319531		0.004669	1.44016	1.44016
Na0.025Cu0.006Sn0.968Se1	521	0.5182	0.515692		0.002508	0.483983	0.483983
Na0.01Ag0.01Sn0.998Se1	421	0.6327	0.62917		0.00353	0.557926	0.557926
Sn1.002Se1	813.866	0.305	0.290562		0.014438	4.73377	4.73377
Sn0.982Bi0.02Se0.955Br0.045	724.15	0.455	0.448994		0.006006	1.32	1.32
Cu0.041Sn0.958Se1	673	0.435	0.44915		-0.01415	-3.25287	3.25287
Na0.019Cu0.009Sn0.972Se1	470.7	0.6385	0.639824		-0.001324	-0.207361	0.207361
Sn0.952Bi0.045Se0.98Br0.02	522.15	0.629	0.665278		-0.036278	-5.76757	5.76757
Sn0.972Bi0.029Se0.97Br0.03	618.26	0.3902	0.379086		0.011114	2.84828	2.84828
Na0.011Cu0.003Sn0.99Se1	769.27	0.3749	0.344105		0.030795	8.21419	8.21419
Sn0.982Bi0.026Se0.994Br0.006	753	0.4526	0.453255		-0.000655	-0.144719	0.144719
Na0.03Sn0.97Se1	574	0.338	0.343928		-0.005928	-1.75385	1.75385
Cu0.041Sn0.958Se1	319.15	0.978	0.947991		0.030009	3.0684	3.0684
Na0.02Cu0.015Sn0.965Se1	708.54	0.488	0.477307		0.010693	2.19119	2.19119
Na0.03Sn0.97Se1	373.15	0.63	0.58851		0.04149	6.58571	6.58571
Na0.01Cu0.011Sn0.978Se1	367	0.7584	0.757608		0.000792	0.10443	0.10443
Sn1.001Se1	294.15	0.876	0.869861		0.006139	0.700799	0.700799
Na0.01Ag0.011Sn0.974Se1	522.788	0.61122	0.576567		0.034653	5.66948	5.66948
Na0.01Cu0.01Sn0.979Se1	724.15	0.386	0.393887		-0.007887	-2.04326	2.04326
Cu0.041Sn0.958Se1	422	0.6056	0.625398		-0.019798	-3.26915	3.26915
Na0.011Cu0.008Sn0.978Se1	419.69	0.76355	0.761725		0.001825	0.239015	0.239015
Na0.012Cu0.008Sn0.994Ge0.025Se0.95S0.05	663	0.365	0.305168		0.059832	16.3923	16.3923
Sn0.964Bi0.041Se1	476	0.727	0.715426		0.011574	1.59202	1.59202
Na0.033Cu0.016Sn0.961Se1	766.395	0.3719	0.373859		-0.001959	-0.526755	0.526755
Sn0.988Bi0.01Se0.98Br0.02	515.84	0.6016	0.61219		-0.01059	-1.76031	1.76031
Na0.01Ag0.011Sn0.974Se1	916	0.4432	0.453966		-0.010766	-2.42915	2.42915
Sn0.94Bi0.06Se1	321.15	0.827	0.85615		-0.02915	-3.52479	3.52479
Na0.021Cu0.003Sn0.978Se1	416	0.713	0.723499		-0.010499	-1.47251	1.47251
Na0.028Cu0.01Sn0.963Se1	570.64	0.457	0.451554		0.005446	1.19168	1.19168
Na0.01Cu0.011Sn0.978Se1	574	0.52799	0.49361		0.03438	6.51149	6.51149
Cu0.078Sn0.918Se1	573.15	0.421	0.405568		0.015432	3.66556	3.66556
Na0.012Cu0.008Sn0.994Ge0.025Se0.95S0.05	622	0.381	0.381628		-0.000628	-0.164829	0.164829
Na0.03Sn0.97Se1	422.15	0.553	0.538769		0.014231	2.57342	2.57342
Cu0.022Sn0.98Se1	373	0.550177	0.593477		-0.0433	-7.87019	7.87019
Na0.01Ag0.011Sn0.974Se1	673	0.2487	0.214542		0.034158	13.7346	13.7346
Sn0.995Se0.959Br0.041	616	0.563	0.552339		0.010661	1.89361	1.89361
Cu0.041Sn0.958Se1	419.15	0.71429	0.718179		-0.003889	-0.544457	0.544457
Sn0.987Bi0.007Se0.984Br0.016	445	0.672	0.689247		-0.017247	-2.56652	2.56652
Na0.028Cu0.01Sn0.963Se1	669.34	0.3986	0.395153		0.003447	0.864777	0.864777
Na0.012Cu0.008Sn0.979Se1	640	0.6556	0.629915		0.025685	3.91779	3.91779
Sn0.999Se1	372	0.929	0.926299		0.002701	0.290743	0.290743
Cu0.019Sn0.979Se1	526	0.538	0.544901		-0.006901	-1.28271	1.28271
Na0.019Cu0.009Sn0.972Se1	569.85	0.5223	0.527417		-0.005117	-0.979705	0.979705
Na0.09Cu0.012Ag0.01Sn0.971Se1	424	0.497	0.516195		-0.019195	-3.86217	3.86217
Sn0.995Bi0.004Se0.992Br0.008	775.15	0.57	0.582337		-0.012337	-2.16439	2.16439
Sn0.988Bi0.01Se0.98Br0.02	726.15	0.467	0.488886		-0.021886	-4.68651	4.68651
Li0.01Cu0.009Sn0.974Se1	470	0.6149	0.652202		-0.037302	-6.06635	6.06635
Sn0.94Bi0.06Se1	470.75	0.661	0.637636		0.023364	3.53464	3.53464
Cu0.007Sn0.992Se1	416	0.6571	0.69841		-0.04131	-6.28671	6.28671
Sn0.982Bi0.02Se0.955Br0.045	576.15	0.546	0.551055		-0.005055	-0.925824	0.925824
Cu0.015Sn0.985Se1	774.15	0.554	0.568996		-0.014996	-2.70686	2.70686
Na0.01Ag0.01Sn0.981Se1	571	0.499	0.523797		-0.024797	-4.96934	4.96934
Na0.014Cu0.012Sn0.973Se1	304.03	0.9913	0.948628		0.042672	4.30465	4.30465
Sn1.006Se1	471.15	0.759	0.779193		-0.020193	-2.66047	2.66047
Na0.011Cu0.003Sn0.99Se1	620.96	0.4316	0.413526		0.018074	4.18767	4.18767
Na0.014Cu0.012Sn0.973Se1	774	0.438	0.457957		-0.019957	-4.55639	4.55639
Na0.029Cu0.002Sn0.969Se1	773	0.437	0.414676		0.022324	5.10847	5.10847
Na0.015Sn0.985Se1	613.91	0.4107	0.392043		0.018657	4.54273	4.54273
Sn1.002Se1	774	0.382	0.376028		0.005972	1.56335	1.56335
Na0.01Cu0.011Sn0.978Se1	293	0.9472	0.961158		-0.013958	-1.47361	1.47361
Sn0.965Bi0.03Se0.994Br0.006	707.73	0.47778	0.456542		0.021238	4.44514	4.44514
Li0.01Cu0.009Sn0.974Se1	818	0.4766	0.452874		0.023726	4.97818	4.97818
Sn0.984Bi0.021Se0.99Br0.01	447	0.7138	0.690206		0.023594	3.30541	3.30541
Na0.013Cu0.002Sn0.986Se1	752.85	0.3699	0.387884		-0.017984	-4.86185	4.86185
Sn0.982Bi0.02Se0.955Br0.045	760.303	0.455	0.448994		0.006006	1.32	1.32
Sn0.983Bi0.006Se0.977Br0.023	555.85	0.4267	0.433131		-0.006431	-1.50715	1.50715
Na0.01Ag0.01Sn0.981Se1	724.15	0.382	0.409851		-0.027851	-7.29084	7.29084
Na0.01Cu0.002Ag0.006Sn0.97Ge0.001Se1	571	0.621	0.64499		-0.02399	-3.86312	3.86312
Sn0.99Bi0.005Se0.989Br0.011	775.15	0.508	0.489273		0.018727	3.68642	3.68642
Na0.012Cu0.008Sn0.994Ge0.025Se0.95S0.05	673	0.365	0.365054		-5.4e-05	-0.0147945	0.0147945
Sn0.964Bi0.041Se1	375	0.887	0.886413		0.000587	0.0661781	0.0661781
Sn0.997Se1	572	0.502	0.543311		-0.041311	-8.22928	8.22928
Na0.01Ag0.01Sn0.998Se1	473	0.5556	0.54835		0.00725	1.3049	1.3049
								Average
								3.50601

## Sheet: Validation dataset
sample	temperature	measured	predicted	difference measured-predicted	percent error (+underestimated, -overestimated)	absolute percent error
Cu0.011Sn0.991Se1	773	0.134	0.089198	0.044802	-33.4343	33.4343
Sn1.002Se1	825.15	0.58748	0.405367	0.182113	-30.999	30.999
Na0.01Ag0.011Sn0.974Se1	774	0.218	0.156291	0.061709	-28.3069	28.3069
Na0.01Ag0.011Sn0.974Se1	323.908	1.0849	0.813987	0.270913	-24.9712	24.9712
Cu0.022Sn0.98Se1	775	0.203	0.153509	0.049491	-24.3798	24.3798
Cu0.08Sn0.919Se1	873.15	0.5413	0.412327	0.128973	-23.8265	23.8265
Na0.01Ag0.011Sn0.974Se1	673	0.2487	0.194093	0.054607	-21.957	21.957
Sn0.999Se1	773	0.317	0.251135	0.065865	-20.7776	20.7776
Cu0.011Sn0.991Se1	924	0.1617	0.130421	0.031279	-19.3438	19.3438
Cu0.009Sn0.999Se1	926	1.048	0.853426	0.194574	-18.5662	18.5662
Sn0.995Se0.959Br0.041	297.15	1.226	1.00716	0.218845	-17.8503	17.8503
Na0.03Cu0.008Sn0.962Se1	324.15	1.096	0.901239	0.194761	-17.7702	17.7702
Na0.01Cu0.002Ag0.006Sn0.97Ge0.001Se1	295	1.211	0.997825	0.213175	-17.6032	17.6032
Sn0.985Bi0.005Se0.98Br0.02	371.15	0.815	0.674422	0.140578	-17.2488	17.2488
Na0.011Cu0.008Sn0.978Se1	299.15	1.158	0.959801	0.198199	-17.1156	17.1156
Na0.013Cu0.002Sn0.986Se1	445	0.6527	0.547102	0.105598	-16.1786	16.1786
Sn0.999Se0.94Br0.06	575.15	0.603	0.505536	0.097464	-16.1632	16.1632
Sn1.006Se1	292.15	1.428	1.19857	0.229434	-16.0668	16.0668
Sn1.002Se1	724.15	0.415	0.348954	0.066046	-15.9147	15.9147
Na0.01Ag0.01Sn0.98Se1	371.15	0.928	0.780902	0.147098	-15.8511	15.8511
Na0.012Cu0.008Sn0.994Ge0.025Se0.95S0.05	663	0.365	0.30899	0.05601	-15.3452	15.3452
Na0.007Cu0.015Sn0.977Se1	774	0.6014	0.509491	0.091909	-15.2825	15.2825
Na0.03Sn0.97Se1	373.15	0.63	0.533845	0.096155	-15.2627	15.2627
Cu0.011Sn0.991Se1	824	0.1617	0.13745	0.02425	-14.9969	14.9969
Na0.011Cu0.003Sn0.99Se1	769.27	0.3749	0.320431	0.054469	-14.5289	14.5289
Cu0.078Sn0.918Se1	473.15	0.52	0.446082	0.073918	-14.215	14.215
Cu0.011Sn0.991Se1	723	0.148	0.127012	0.020988	-14.1811	14.1811
Na0.012Cu0.008Sn0.979Se1	340	1.222	1.05586	0.166142	-13.5959	13.5959
Na0.011Cu0.003Sn0.99Se1	620.96	0.4316	0.373987	0.057613	-13.3487	13.3487
Cu0.009Sn0.999Se1	372	1.5568	1.35037	0.20643	-13.2599	13.2599
Na0.01Cu0.01Ag0.01Sn0.98Se1	427.15	0.78	0.678177	0.101823	-13.0542	13.0542
Sn1.002Se1	774	0.3837	0.333707	0.049993	-13.0292	13.0292
Na0.033Cu0.016Sn0.961Se1	568.21	0.4627	0.40315	0.05955	-12.8701	12.8701
Cu0.022Sn0.98Se1	471	0.438	0.382003	0.055997	-12.7847	12.7847
Na0.01Ag0.011Sn0.974Se1	724	0.2331	0.203727	0.029373	-12.601	12.601
Na0.01Sn0.976Au0.01Se1	324.25	1.0297	0.899979	0.129721	-12.5979	12.5979
Na0.012Cu0.008Sn0.979Se1	302.15	1.392	1.21704	0.174964	-12.5693	12.5693
Na0.012Cu0.008Sn0.979Se1	760	0.6558	0.573485	0.082315	-12.5518	12.5518
Cu0.062Sn0.941Se1	574	0.583	0.51083	0.07217	-12.3791	12.3791
Cu0.08Sn0.919Se1	297	1.225	1.07637	0.148633	-12.1333	12.1333
Cu0.022Sn0.98Se1	875	0.1833	0.161478	0.021822	-11.9051	11.9051
Sn0.964Bi0.041Se1	725.15	0.552	0.486506	0.065494	-11.8649	11.8649
Na0.01Cu0.01Sn0.98Se1	773	0.424	0.374002	0.049998	-11.792	11.792
Na0.01Ag0.011Sn0.974Se1	421	0.8098	0.714771	0.095029	-11.7349	11.7349
Na0.01Ag0.011Sn0.974Se1	471	0.7029	0.62058	0.08232	-11.7115	11.7115
Cu0.078Sn0.918Se1	371.15	0.681	0.60169	0.07931	-11.6461	11.6461
Sn0.964Bi0.041Se1	375	0.887	0.78393	0.10307	-11.6201	11.6201
Sn0.999Se0.94Br0.06	664.06	0.514	0.454696	0.059304	-11.5377	11.5377
Sn1.006Se1	421.15	0.881	0.779782	0.101218	-11.489	11.489
Na0.01Ag0.01Sn0.981Se1	294	1.077	0.953502	0.123498	-11.4669	11.4669
Sn0.985Bi0.005Se0.98Br0.02	421	0.715	0.635829	0.079171	-11.0729	11.0729
Na0.01Cu0.01Sn0.98Se1	823.15	0.487	0.433563	0.053437	-10.9727	10.9727
Na0.012Cu0.008Sn0.979Se1	730	0.6436	0.573485	0.070115	-10.8942	10.8942
Cu0.015Sn0.985Se1	711.17	0.60411	0.538436	0.065674	-10.8712	10.8712
Cu0.015Sn0.985Se1	711	0.604	0.538436	0.065564	-10.855	10.855
Sn0.999Se1	523	0.692	0.618133	0.073867	-10.6744	10.6744
Na0.028Cu0.01Sn0.963Se1	471.77	0.6145	0.549082	0.065418	-10.6457	10.6457
Sn0.995Se0.959Br0.041	466	0.7303	0.65269	0.07761	-10.6271	10.6271
Na0.01Ag0.01Sn0.981Se1	523	0.565	0.505039	0.059961	-10.6126	10.6126
Sn1.006Se1	824.15	0.486	0.434951	0.051049	-10.5039	10.5039
Na0.01Cu0.01Sn0.979Se1	523	0.576	0.515752	0.060248	-10.4597	10.4597
Cu0.021Sn0.983Se1	295	1.106	0.990415	0.115585	-10.4507	10.4507
Na0.007Cu0.015Sn0.977Se1	674.15	0.625	0.560113	0.064887	-10.3819	10.3819
Cu0.041Sn0.958Se1	624.15	0.5279	0.473295	0.054605	-10.3438	10.3438
Na0.007Cu0.015Sn0.977Se1	294.15	1.124	1.01098	0.113021	-10.0552	10.0552
Sn0.983Bi0.006Se0.977Br0.023	482.53	0.5051	0.455577	0.049523	-9.80459	9.80459
Sn0.99Bi0.005Se0.989Br0.011	575	0.568	0.512632	0.055368	-9.74789	9.74789
Na0.012Cu0.008Sn0.994Ge0.025Se0.95S0.05	622	0.381	0.34405	0.03695	-9.69816	9.69816
Sn0.982Bi0.02Se0.955Br0.045	301.15	1.016	0.918501	0.097499	-9.59636	9.59636
Sn0.997Se1	723.15	0.473	0.428231	0.044769	-9.4649	9.4649
Sn0.997Se1	421.15	0.687	0.622846	0.064154	-9.33828	9.33828
Na0.01Cu0.01Sn0.979Se1	423.15	0.701	0.636432	0.064568	-9.21084	9.21084
Cu0.007Sn0.992Se1	660.3	0.5103	0.463594	0.046706	-9.15266	9.15266
Sn0.997Bi0.005Se0.97Br0.03	453.46	0.7468	0.679274	0.067526	-9.04205	9.04205
Cu0.021Sn0.983Se1	571	0.514	0.467645	0.046355	-9.01848	9.01848
Na0.012Cu0.008Sn0.994Ge0.025Se0.95S0.05	673	0.365	0.332155	0.032845	-8.99863	8.99863
Na0.025Cu0.005Sn0.969Se1	674	0.4005	0.365245	0.035255	-8.80275	8.80275
Na0.02Cu0.015Sn0.965Se1	658.85	0.5078	0.463665	0.044135	-8.69141	8.69141
Sn0.976Bi0.011Se0.977Br0.023	424.15	0.742	0.678044	0.063956	-8.61941	8.61941
Na0.01Cu0.01Sn0.979Se1	523.15	0.572	0.522816	0.049184	-8.5986	8.5986
Na0.01Cu0.01Sn0.979Se1	523	0.572	0.522816	0.049184	-8.5986	8.5986
Cu0.019Sn0.979Se1	926	0.507	0.463628	0.043372	-8.55464	8.55464
Sn0.976Bi0.011Se0.977Br0.023	775.15	0.495	0.453057	0.041943	-8.47333	8.47333
Na0.036Cu0.014Sn0.948Se1	380	0.8379	0.76729	0.07061	-8.42702	8.42702
Cu0.041Sn0.958Se1	319.15	0.978	0.895597	0.082403	-8.42566	8.42566
Na0.01Cu0.011Sn0.978Se1	572.8	0.526	0.481868	0.044132	-8.39011	8.39011
Na0.01Cu0.01Sn0.98Se1	672	0.455	0.417142	0.037858	-8.32044	8.32044
Na0.03Sn0.969Se1	674	0.405	0.371307	0.033693	-8.31926	8.31926
Na0.03Sn0.97Se1	422.15	0.553	0.507376	0.045624	-8.25027	8.25027
Cu0.009Sn0.999Se1	472	1.248	1.14546	0.102541	-8.21643	8.21643
Na0.03Sn0.969Se1	321	0.976	0.895956	0.080044	-8.20123	8.20123
Sn0.996Bi0.006Se0.974Br0.026	322.15	1.1683	1.07268	0.095625	-8.18497	8.18497
Na0.012Cu0.008Sn0.994Ge0.025Se0.95S0.05	572	0.41358	0.379833	0.033747	-8.15973	8.15973
Na0.033Cu0.016Sn0.961Se1	617.84	0.4311	0.395938	0.035162	-8.15634	8.15634
Na0.01Cu0.01Sn0.98Se1	524	0.581	0.533834	0.047166	-8.11807	8.11807
Na0.01Cu0.01Sn0.98Se1	674.15	0.471	0.433079	0.037921	-8.05117	8.05117
Na0.01Ag0.01Sn0.981Se1	321.15	0.968	0.890136	0.077864	-8.0438	8.0438
Na0.033Cu0.016Sn0.961Se1	667	0.4056	0.373366	0.032234	-7.94724	7.94724
Sn1.001Se1	612	0.448	0.413206	0.034794	-7.76652	7.76652
Na0.01Sn0.976Au0.01Se1	370	0.8783	0.810314	0.067986	-7.74064	7.74064
Na0.011Cu0.008Sn0.978Se1	522.15	0.642	0.592586	0.049414	-7.69688	7.69688
Na0.025Cu0.005Sn0.969Se1	574.15	0.478	0.441412	0.036588	-7.65439	7.65439
Cu0.015Sn0.985Se1	304.18	1.051	0.971217	0.079783	-7.59115	7.59115
Na0.01Ag0.01Sn0.98Se1	672.15	0.485	0.448511	0.036489	-7.52351	7.52351
Sn0.995Bi0.004Se0.992Br0.008	426.15	0.94	0.869464	0.070536	-7.50383	7.50383
Na0.01Cu0.011Sn0.978Se1	673	0.4503	0.416667	0.033633	-7.46902	7.46902
Li0.01Cu0.009Sn0.974Se1	923	0.50737	0.469712	0.037658	-7.4222	7.4222
Sn0.995Bi0.004Se0.992Br0.008	298	1.34	1.24055	0.099449	-7.42157	7.42157
Cu0.009Sn0.999Se1	420	1.3872	1.28455	0.102652	-7.39994	7.39994
Sn0.99Bi0.005Se0.989Br0.011	675.15	0.523	0.485032	0.037968	-7.25966	7.25966
Na0.01Cu0.01Sn0.98Se1	724	0.439	0.407131	0.031869	-7.25945	7.25945
Sn0.99Bi0.005Se0.989Br0.011	727	0.508	0.471849	0.036151	-7.11634	7.11634
Cu0.041Sn0.958Se1	299.15	0.978	0.909155	0.068845	-7.03937	7.03937
Na0.01Sn0.976Au0.01Se1	823	0.4997	0.464672	0.035028	-7.00981	7.00981
Li0.01Cu0.009Sn0.974Se1	324.856	0.98399	0.915085	0.068905	-7.00261	7.00261
Sn0.976Bi0.011Se0.977Br0.023	726	0.495	0.460406	0.034594	-6.98869	6.98869
Sn0.99Bi0.005Se0.989Br0.011	759.17	0.50696	0.471849	0.035111	-6.92579	6.92579
Cu0.01Sn0.989Se1	925	0.535	0.498334	0.036666	-6.85346	6.85346
Sn0.983Bi0.006Se0.977Br0.023	482.5	0.5051	0.470491	0.034609	-6.85191	6.85191
Cu0.019Sn0.979Se1	473.15	0.599	0.55808	0.04092	-6.83139	6.83139
Sn0.996Bi0.006Se0.974Br0.026	293.15	1.3049	1.21602	0.088876	-6.81094	6.81094
Cu0.022Sn0.98Se1	423	0.489	0.455859	0.033141	-6.7773	6.7773
Na0.029Cu0.002Sn0.969Se1	773	0.437	0.407933	0.029067	-6.65149	6.65149
Na0.011Cu0.003Sn0.99Se1	719.88	0.3879	0.362191	0.025709	-6.62774	6.62774
Na0.01Ag0.01Sn0.981Se1	624.15	0.458	0.42841	0.02959	-6.4607	6.4607
Sn0.985Bi0.005Se0.98Br0.02	673	0.529	0.494965	0.034035	-6.43384	6.43384
Na0.01Cu0.01Ag0.01Sn0.98Se1	673.15	0.499	0.467194	0.031806	-6.37395	6.37395
Na0.012Cu0.008Sn0.994Ge0.025Se0.95S0.05	303.61	0.6681	0.626122	0.041978	-6.28319	6.28319
Sn1.006Se1	524.15	0.714	0.669457	0.044543	-6.23852	6.23852
Na0.01Cu0.01Sn0.979Se1	624.15	0.464	0.435198	0.028802	-6.20733	6.20733
Na0.01Cu0.01Sn0.979Se1	423.15	0.695	0.651967	0.043033	-6.1918	6.1918
Na0.03Cu0.008Sn0.962Se1	405	0.8263	0.775674	0.050626	-6.12683	6.12683
Na0.03Cu0.008Sn0.962Se1	453	0.7254	0.68099	0.04441	-6.12214	6.12214
Na0.011Cu0.008Sn0.978Se1	725.15	0.485	0.455705	0.029295	-6.04021	6.04021
Na0.03Cu0.008Sn0.962Se1	527	0.63	0.592224	0.037776	-5.99619	5.99619
Sn0.991Bi0.004Se0.992Br0.008	321.98	1.036	0.974073	0.061927	-5.97751	5.97751
Na0.036Cu0.014Sn0.948Se1	575.15	0.562	0.528435	0.033565	-5.97242	5.97242
Sn0.995Bi0.004Se0.992Br0.008	323.15	1.232	1.1585	0.073504	-5.96623	5.96623
Sn0.999Se0.94Br0.06	862.78	0.487	0.458135	0.028865	-5.9271	5.9271
Cu0.062Sn0.941Se1	470	0.7259	0.683209	0.042691	-5.88111	5.88111
Na0.012Cu0.008Sn0.979Se1	480	0.857	0.806951	0.050049	-5.84002	5.84002
Na0.01Cu0.011Sn0.978Se1	621.709	0.464	0.436943	0.027057	-5.83125	5.83125
Cu0.021Sn0.983Se1	372.15	0.873	0.822142	0.050858	-5.82566	5.82566
Na0.025Cu0.005Sn0.969Se1	524	0.524	0.493476	0.030524	-5.82519	5.82519
Na0.028Cu0.01Sn0.963Se1	520	0.5006	0.47159	0.02901	-5.79505	5.79505
Sn0.982Bi0.02Se0.955Br0.045	475.15	0.652	0.614335	0.037665	-5.77684	5.77684
Sn0.999Se0.94Br0.06	774.15	0.479	0.451346	0.027654	-5.77328	5.77328
Sn1.001Se1	626.15	0.461	0.434509	0.026491	-5.74642	5.74642
Na0.015Sn0.985Se1	663	0.387	0.364773	0.022227	-5.74341	5.74341
Sn1.006Se1	811.642	0.479	0.451496	0.027504	-5.74196	5.74196
Cu0.007Sn0.992Se1	709	0.4968	0.468289	0.028511	-5.73893	5.73893
Na0.025Cu0.006Sn0.968Se1	372.6	0.761	0.718171	0.042829	-5.62799	5.62799
Na0.029Cu0.002Sn0.969Se1	764.984	0.4385	0.413942	0.024558	-5.60046	5.60046
Cu0.041Sn0.958Se1	577	0.5124	0.483908	0.028492	-5.5605	5.5605
Cu0.019Sn0.979Se1	875.15	0.4979	0.470543	0.027357	-5.49448	5.49448
Sn0.99Bi0.005Se0.989Br0.011	531	0.598	0.565239	0.032761	-5.47843	5.47843
Na0.01Cu0.011Sn0.978Se1	319	0.8822	0.834145	0.048055	-5.44718	5.44718
Na0.007Cu0.015Sn0.977Se1	512.85	0.7104	0.672368	0.038032	-5.3536	5.3536
Na0.03Sn0.969Se1	472.15	0.515	0.487541	0.027459	-5.33184	5.33184
Na0.025Cu0.006Sn0.968Se1	304.27	0.9093	0.860861	0.048439	-5.32706	5.32706
Sn0.991Bi0.004Se0.992Br0.008	703.6	0.5508	0.522017	0.028783	-5.22567	5.22567
Sn0.982Bi0.02Se0.955Br0.045	423.15	0.713	0.675937	0.037063	-5.19818	5.19818
Sn0.997Se1	923	0.473	0.448859	0.024141	-5.10381	5.10381
Na0.03Cu0.008Sn0.962Se1	357.7	0.9433	0.895314	0.047986	-5.08703	5.08703
Cu0.015Sn0.985Se1	369	0.877	0.832587	0.044413	-5.0642	5.0642
Sn1.002Se1	522.15	0.63	0.598151	0.031849	-5.0554	5.0554
Sn0.988Bi0.01Se0.98Br0.02	425.15	0.723	0.686664	0.036336	-5.02573	5.02573
Na0.012Cu0.008Sn0.979Se1	640	0.6556	0.623227	0.032373	-4.93792	4.93792
Na0.03Sn0.969Se1	372.15	0.852	0.809961	0.042039	-4.93415	4.93415
Na0.015Sn0.985Se1	762.56	0.3564	0.339192	0.017208	-4.82828	4.82828
Sn0.997Bi0.005Se0.97Br0.03	530.15	0.642	0.611592	0.030408	-4.73645	4.73645
Na0.007Cu0.015Sn0.977Se1	370.92	0.9101	0.867026	0.043074	-4.73289	4.73289
Na0.014Cu0.006Sn0.98Se1	716.77	0.4504	0.429114	0.021286	-4.72602	4.72602
Na0.01Cu0.002Ag0.006Sn0.97Ge0.001Se1	673.15	0.528	0.503414	0.024586	-4.65644	4.65644
Li0.01Cu0.009Sn0.974Se1	823	0.4766	0.454763	0.021837	-4.58183	4.58183
Na0.01Ag0.01Sn0.998Se1	873	0.4167	0.397648	0.019052	-4.57211	4.57211
Cu0.007Sn0.992Se1	759.05	0.4787	0.457023	0.021677	-4.52831	4.52831
Na0.015Sn0.985Se1	613.91	0.4107	0.392179	0.018521	-4.50962	4.50962
Na0.015Sn0.985Se1	613	0.4107	0.392179	0.018521	-4.50962	4.50962
Na0.011Cu0.003Sn0.99Se1	471	0.5421	0.517767	0.024333	-4.48866	4.48866
Na0.013Cu0.002Sn0.986Se1	546.09	0.5158	0.492723	0.023077	-4.47402	4.47402
Na0.09Cu0.012Ag0.01Sn0.971Se1	371.15	0.574	0.548394	0.025606	-4.46098	4.46098
Na0.01Sn0.976Au0.01Se1	873	0.48457	0.46311	0.02146	-4.42867	4.42867
Na0.01Cu0.01Sn0.979Se1	624.15	0.467	0.446336	0.020664	-4.42484	4.42484
Sn0.982Bi0.02Se0.955Br0.045	320.15	0.94	0.898423	0.041577	-4.42309	4.42309
Sn0.953Bi0.046Se0.955Br0.045	723.15	0.449	0.429185	0.019815	-4.41314	4.41314
Cu0.022Sn0.98Se1	373	0.550177	0.526352	0.023825	-4.33042	4.33042
Na0.01Cu0.011Sn0.978Se1	304.64	0.94415	0.903292	0.040858	-4.32749	4.32749
Sn0.94Bi0.061Se0.939Br0.061	578.15	0.554	0.530083	0.023917	-4.31715	4.31715
Na0.01Ag0.01Sn0.981Se1	423.15	0.687	0.657443	0.029557	-4.30233	4.30233
Sn0.995Se0.959Br0.041	326	1.1323	1.08402	0.048278	-4.26371	4.26371
Na0.02Cu0.015Sn0.965Se1	758.02	0.4634	0.443725	0.019675	-4.24579	4.24579
Sn0.952Bi0.045Se0.98Br0.02	372.96	0.8495	0.813947	0.035553	-4.18517	4.18517
Na0.033Cu0.016Sn0.961Se1	766.395	0.3719	0.356372	0.015528	-4.17532	4.17532
Na0.036Cu0.014Sn0.948Se1	475.15	0.687	0.658443	0.028557	-4.15677	4.15677
Sn0.991Bi0.004Se0.992Br0.008	753.5	0.534	0.511813	0.022187	-4.15487	4.15487
Cu0.015Sn0.985Se1	513.57	0.6878	0.659307	0.028493	-4.14263	4.14263
Na0.026Cu0.01Sn0.961Se1	303.99	0.891	0.854875	0.036125	-4.05443	4.05443
Sn0.964Bi0.041Se1	624.15	0.611	0.586231	0.024769	-4.05385	4.05385
Sn0.991Bi0.004Se0.992Br0.008	774.15	0.534	0.512355	0.021645	-4.05337	4.05337
Na0.02Cu0.015Sn0.965Se1	511.24	0.582	0.558653	0.023347	-4.01151	4.01151
Cu0.009Sn0.999Se1	523	1.14065	1.09506	0.045589	-3.99676	3.99676
Na0.014Cu0.012Sn0.973Se1	715.1	0.4709	0.452108	0.018792	-3.99066	3.99066
Na0.03Sn0.969Se1	422.15	0.743	0.713458	0.029542	-3.97604	3.97604
Sn0.997Bi0.005Se0.97Br0.03	296.15	1.177	1.13033	0.046675	-3.96559	3.96559
Sn0.991Bi0.004Se0.992Br0.008	652.4	0.5745	0.551913	0.022587	-3.93159	3.93159
Na0.012Cu0.008Sn0.994Ge0.025Se0.95S0.05	520	0.445	0.42762	0.01738	-3.90562	3.90562
Na0.01Cu0.011Sn0.978Se1	623	0.466	0.447873	0.018127	-3.88991	3.88991
Na0.036Cu0.014Sn0.948Se1	424.15	0.78	0.749817	0.030183	-3.86962	3.86962
Na0.01Cu0.011Sn0.978Se1	574	0.52799	0.507718	0.020272	-3.83947	3.83947
Na0.03Sn0.97Se1	473.15	0.461	0.443387	0.017613	-3.82061	3.82061
Sn0.997Bi0.005Se0.97Br0.03	364	0.9479	0.91272	0.03518	-3.71136	3.71136
Sn0.976Bi0.011Se0.977Br0.023	470.15	0.68	0.654916	0.025084	-3.68882	3.68882
Sn1.002Se1	420.15	0.799	0.769546	0.029454	-3.68636	3.68636
Na0.019Cu0.009Sn0.972Se1	470.7	0.6385	0.61503	0.02347	-3.6758	3.6758
Sn0.94Bi0.06Se1	574.15	0.59	0.568352	0.021648	-3.66915	3.66915
Na0.019Cu0.009Sn0.972Se1	771	0.441	0.424925	0.016075	-3.64512	3.64512
Cu0.007Sn0.992Se1	512.14	0.5673	0.546751	0.020549	-3.62225	3.62225
Sn0.985Bi0.005Se0.98Br0.02	471.15	0.686	0.661383	0.024617	-3.58848	3.58848
Na0.01Ag0.011Sn0.974Se1	824	0.4584	0.442225	0.016175	-3.52858	3.52858
Na0.09Cu0.012Ag0.01Sn0.971Se1	522	0.45	0.434348	0.015652	-3.47822	3.47822
Na0.014Cu0.012Sn0.973Se1	304.03	0.9913	0.957068	0.034232	-3.45324	3.45324
Sn0.94Bi0.061Se0.939Br0.061	760.29	0.4783	0.4618	0.0165	-3.44972	3.44972
Sn0.94Bi0.06Se1	470.75	0.661	0.638323	0.022677	-3.43071	3.43071
Na0.014Cu0.006Sn0.98Se1	371.44	0.717	0.692595	0.024405	-3.40377	3.40377
Na0.03Sn0.969Se1	724	0.465	0.449461	0.015539	-3.34172	3.34172
Sn0.99Bi0.005Se0.989Br0.011	775.15	0.508	0.491157	0.016843	-3.31555	3.31555
Na0.019Cu0.009Sn0.972Se1	421.49	0.7163	0.692557	0.023743	-3.31467	3.31467
Na0.014Cu0.012Sn0.973Se1	665.65	0.4944	0.478032	0.016368	-3.31068	3.31068
Cu0.015Sn0.985Se1	760.85	0.5695	0.551	0.0185	-3.24846	3.24846
Cu0.041Sn0.958Se1	367.15	0.82299	0.796258	0.026732	-3.24816	3.24816
Cu0.041Sn0.958Se1	773.15	0.46584	0.450817	0.015023	-3.22493	3.22493
Sn0.982Bi0.026Se0.994Br0.006	753	0.4526	0.438078	0.014522	-3.20857	3.20857
Na0.01Cu0.01Sn0.98Se1	624.15	0.456	0.441379	0.014621	-3.20636	3.20636
Na0.014Cu0.006Sn0.98Se1	667.36	0.4712	0.456101	0.015099	-3.20437	3.20437
Na0.021Cu0.003Sn0.978Se1	368.66	0.7973	0.772043	0.025257	-3.16782	3.16782
Cu0.022Sn0.98Se1	525	0.387162	0.374953	0.012209	-3.15346	3.15346
Na0.029Cu0.002Sn0.969Se1	370.37	0.8117	0.786116	0.025584	-3.1519	3.1519
Na0.021Cu0.003Sn0.978Se1	303.92	0.9255	0.89652	0.02898	-3.13128	3.13128
Na0.01Cu0.011Sn0.978Se1	324.54	0.8822	0.85466	0.02754	-3.12174	3.12174
Sn0.995Se0.959Br0.041	369	0.97	0.940269	0.029731	-3.06505	3.06505
Na0.01Cu0.011Sn0.978Se1	424.246	0.65	0.630395	0.019605	-3.01615	3.01615
Sn0.988Bi0.01Se0.98Br0.02	475.07	0.6563	0.636521	0.019779	-3.01371	3.01371
Sn0.995Se0.959Br0.041	716	0.5048	0.489742	0.015058	-2.98296	2.98296
Sn0.964Bi0.041Se1	476	0.727	0.705335	0.021665	-2.98006	2.98006
Cu0.01Sn0.989Se1	371.15	0.7485	0.726274	0.022226	-2.96941	2.96941
Na0.01Cu0.01Sn0.98Se1	321.15	0.927	0.900201	0.026799	-2.89094	2.89094
Sn0.952Bi0.045Se0.98Br0.02	473.15	0.719	0.698428	0.020572	-2.8612	2.8612
Na0.01Ag0.011Sn0.974Se1	473	0.295	0.286684	0.008316	-2.81898	2.81898
Sn0.999Se1	529	0.422	0.410532	0.011468	-2.71754	2.71754
Na0.019Cu0.009Sn0.972Se1	767.7	0.4521	0.43988	0.01222	-2.70294	2.70294
Na0.014Cu0.006Sn0.98Se1	617.97	0.4888	0.475623	0.013177	-2.69579	2.69579
Cu0.011Sn0.991Se1	521	0.188762	0.183686	0.005076	-2.6891	2.6891
Cu0.01Sn0.989Se1	474.15	0.5805	0.565146	0.015354	-2.64496	2.64496
Sn0.988Bi0.01Se0.98Br0.02	446	0.6999	0.681443	0.018457	-2.63709	2.63709
Sn1.002Se1	292.15	1.245	1.21384	0.031164	-2.50313	2.50313
Na0.021Cu0.003Sn0.978Se1	512.75	0.5715	0.557499	0.014001	-2.44987	2.44987
Na0.02Cu0.015Sn0.965Se1	321.69	0.8663	0.845098	0.021202	-2.44742	2.44742
Sn0.984Bi0.021Se0.99Br0.01	470.15	0.664	0.648061	0.015939	-2.40045	2.40045
Na0.03Sn0.97Se1	490	0.5411	0.528286	0.012814	-2.36814	2.36814
Sn0.997Bi0.005Se0.97Br0.03	549.77	0.6218	0.607109	0.014691	-2.36266	2.36266
Cu0.078Sn0.918Se1	572	0.478	0.466869	0.011131	-2.32866	2.32866
Na0.011Cu0.003Sn0.99Se1	521.33	0.4994	0.487855	0.011545	-2.31177	2.31177
Na0.019Cu0.009Sn0.972Se1	323	0.9109	0.89021	0.02069	-2.27138	2.27138
Sn0.976Bi0.011Se0.977Br0.023	765.77	0.495	0.48379	0.01121	-2.26465	2.26465
Sn0.965Bi0.03Se0.994Br0.006	385	0.744	0.727228	0.016772	-2.2543	2.2543
Na0.012Cu0.008Sn0.994Ge0.025Se0.95S0.05	672	0.334	0.326487	0.007513	-2.2494	2.2494
Sn0.999Se0.94Br0.06	371.14	0.823	0.804647	0.018353	-2.23001	2.23001
Na0.01Cu0.011Sn0.978Se1	421	0.6522	0.63776	0.01444	-2.21404	2.21404
Na0.03Sn0.969Se1	774.15	0.39	0.381445	0.008555	-2.19359	2.19359
Sn0.94Bi0.061Se0.939Br0.061	775.15	0.479	0.468626	0.010374	-2.16576	2.16576
Na0.025Cu0.006Sn0.968Se1	471.886	0.5867	0.574127	0.012573	-2.143	2.143
Sn1.006Se1	724.15	0.486	0.475588	0.010412	-2.14239	2.14239
Na0.021Cu0.003Sn0.978Se1	416	0.713	0.69782	0.01518	-2.12903	2.12903
Sn0.987Bi0.007Se0.984Br0.016	635	0.485	0.474887	0.010113	-2.08515	2.08515
Na0.014Cu0.006Sn0.98Se1	304.17	0.877	0.858954	0.018046	-2.0577	2.0577
Cu0.078Sn0.918Se1	773	0.335	0.328186	0.006814	-2.03403	2.03403
Sn0.988Bi0.01Se0.98Br0.02	304	0.9878	0.968064	0.019736	-1.99798	1.99798
Sn0.996Bi0.006Se0.974Br0.026	552	0.6878	0.674115	0.013685	-1.98968	1.98968
Sn0.965Bi0.03Se0.994Br0.006	757.9	0.4777	0.468212	0.009488	-1.98618	1.98618
Na0.01Ag0.01Sn0.98Se1	571	0.547	0.536406	0.010594	-1.93675	1.93675
Li0.01Cu0.009Sn0.974Se1	523.65	0.5688	0.558068	0.010732	-1.88678	1.88678
Sn0.965Bi0.03Se0.994Br0.006	363	0.7779	0.763305	0.014595	-1.87621	1.87621
Na0.01Ag0.011Sn0.974Se1	873	0.4584	0.450331	0.008069	-1.76025	1.76025
Sn0.984Bi0.021Se0.99Br0.01	754	0.4915	0.482914	0.008586	-1.7469	1.7469
Sn0.991Bi0.004Se0.992Br0.008	601.2	0.6067	0.596264	0.010436	-1.72013	1.72013
Na0.013Cu0.002Sn0.986Se1	300.13	0.9279	0.912247	0.015653	-1.68693	1.68693
Cu0.062Sn0.941Se1	524	0.647051	0.636204	0.010847	-1.67637	1.67637
Na0.025Cu0.006Sn0.968Se1	422.43	0.6674	0.656226	0.011174	-1.67426	1.67426
Na0.036Cu0.014Sn0.948Se1	303.15	1.03	1.01294	0.017056	-1.65592	1.65592
Sn1.002Se1	624.15	0.4427	0.435789	0.006911	-1.5611	1.5611
Cu0.041Sn0.958Se1	671	0.435	0.428243	0.006757	-1.55333	1.55333
Na0.03Sn0.969Se1	774	0.465	0.458006	0.006994	-1.50409	1.50409
Sn0.984Bi0.021Se0.99Br0.01	447	0.7138	0.703299	0.010501	-1.47114	1.47114
Sn0.985Bi0.005Se0.98Br0.02	293.15	1	0.985331	0.014669	-1.4669	1.4669
Sn0.965Bi0.03Se0.994Br0.006	685	0.4814	0.474514	0.006886	-1.43041	1.43041
Na0.01Cu0.011Sn0.978Se1	373	0.7584	0.747652	0.010748	-1.41719	1.41719
Sn0.996Bi0.006Se0.974Br0.026	524	0.713	0.702903	0.010097	-1.41613	1.41613
Na0.01Cu0.011Sn0.978Se1	473	0.588	0.579753	0.008247	-1.40255	1.40255
Sn1.006Se1	471.15	0.759	0.748455	0.010545	-1.38933	1.38933
Na0.03Sn0.97Se1	624.15	0.307	0.302853	0.004147	-1.35081	1.35081
Sn0.94Bi0.06Se1	421.15	0.679	0.670148	0.008852	-1.30368	1.30368
Na0.01Cu0.011Sn0.978Se1	367	0.7584	0.74868	0.00972	-1.28165	1.28165
Cu0.041Sn0.958Se1	675	0.4503	0.444771	0.005529	-1.22785	1.22785
Na0.01Ag0.01Sn0.998Se1	473	0.5556	0.548814	0.006786	-1.22138	1.22138
Na0.021Cu0.005Sn0.974Se1	674	0.4	0.395301	0.004699	-1.17475	1.17475
Sn0.983Bi0.006Se0.977Br0.023	516.54	0.4665	0.461082	0.005418	-1.16141	1.16141
Na0.01Cu0.011Sn0.978Se1	523.07	0.5417	0.535501	0.006199	-1.14436	1.14436
Sn0.982Bi0.026Se0.994Br0.006	451	0.6326	0.625454	0.007146	-1.12962	1.12962
Na0.03Sn0.97Se1	591.86	0.4454	0.440398	0.005002	-1.12304	1.12304
Na0.01Cu0.01Sn0.979Se1	672.15	0.417	0.412384	0.004616	-1.10695	1.10695
Na0.03Sn0.969Se1	574	0.527	0.521291	0.005709	-1.0833	1.0833
Cu0.019Sn0.979Se1	675.15	0.4762	0.471206	0.004994	-1.04872	1.04872
Na0.03Cu0.008Sn0.962Se1	763.29	0.4312	0.426735	0.004465	-1.03548	1.03548
Sn0.94Bi0.06Se1	724.15	0.502	0.496863	0.005137	-1.02331	1.02331
Na0.029Cu0.002Sn0.969Se1	616.077	0.5211	0.515855	0.005245	-1.00652	1.00652
Na0.03Sn0.97Se1	442.14	0.599	0.593003	0.005997	-1.00117	1.00117
Na0.01Cu0.01Ag0.01Sn0.98Se1	322.15	0.968	0.958346	0.009654	-0.997314	0.997314
Na0.01Ag0.01Sn0.981Se1	370.15	0.827	0.818759	0.008241	-0.996493	0.996493
Na0.01Cu0.01Sn0.979Se1	321	0.819	0.811271	0.007729	-0.943712	0.943712
Na0.01Cu0.011Sn0.978Se1	667	0.4489	0.444673	0.004227	-0.941635	0.941635
Na0.026Cu0.01Sn0.961Se1	564.153	0.4798	0.475379	0.004421	-0.921426	0.921426
Na0.03Sn0.969Se1	724	0.39	0.386461	0.003539	-0.907436	0.907436
Na0.03Sn0.969Se1	774	0.464	0.459811	0.004189	-0.902802	0.902802
Cu0.078Sn0.918Se1	425.15	0.582	0.576816	0.005184	-0.890722	0.890722
Cu0.041Sn0.958Se1	574	0.48137	0.477164	0.004206	-0.873756	0.873756
Na0.09Cu0.012Ag0.01Sn0.971Se1	321.15	0.683	0.677163	0.005837	-0.854612	0.854612
Sn0.94Bi0.061Se0.939Br0.061	759.99	0.479	0.474966	0.004034	-0.842171	0.842171
Sn0.984Bi0.021Se0.99Br0.01	674.15	0.513	0.508854	0.004146	-0.808187	0.808187
Sn0.99Bi0.005Se0.989Br0.011	298.15	0.987	0.979038	0.007962	-0.806687	0.806687
Cu0.015Sn0.985Se1	774.15	0.554	0.54978	0.00422	-0.761733	0.761733
Na0.021Cu0.003Sn0.978Se1	465	0.6365	0.631865	0.004635	-0.728201	0.728201
Na0.019Cu0.009Sn0.972Se1	301.5	0.9617	0.954703	0.006997	-0.727566	0.727566
Na0.011Cu0.003Sn0.99Se1	571.43	0.4623	0.458947	0.003353	-0.725287	0.725287
Sn0.995Se0.959Br0.041	517	0.652	0.647373	0.004627	-0.709663	0.709663
Na0.007Cu0.015Sn0.977Se1	323	1.0273	1.02018	0.007118	-0.692884	0.692884
Na0.026Cu0.01Sn0.961Se1	322.35	0.852	0.846402	0.005598	-0.657042	0.657042
Sn0.952Bi0.045Se0.98Br0.02	574	0.614	0.609998	0.004002	-0.651792	0.651792
Cu0.01Sn0.989Se1	424.15	0.6416	0.637612	0.003988	-0.621571	0.621571
Na0.02Cu0.015Sn0.965Se1	708.54	0.488	0.485247	0.002753	-0.564139	0.564139
Na0.01Ag0.01Sn0.998Se1	523	0.5093	0.506506	0.002794	-0.548596	0.548596
Na0.01Cu0.01Ag0.01Sn0.98Se1	295.15	1.03	1.02451	0.005494	-0.533398	0.533398
Na0.033Cu0.016Sn0.961Se1	322.944	0.7056	0.701856	0.003744	-0.530612	0.530612
Na0.013Cu0.002Sn0.986Se1	399.11	0.7309	0.727555	0.003345	-0.457655	0.457655
Na0.007Cu0.015Sn0.977Se1	304.43	1.084	1.07915	0.004846	-0.447048	0.447048
Sn0.965Bi0.03Se0.994Br0.006	707.73	0.47778	0.47568	0.0021	-0.439533	0.439533
Sn0.982Bi0.026Se0.994Br0.006	725	0.444	0.442105	0.001895	-0.426802	0.426802
Na0.01Cu0.011Sn0.978Se1	472	0.588	0.585612	0.002388	-0.406122	0.406122
Sn0.997Se1	625.15	0.472	0.470197	0.001803	-0.381992	0.381992
Sn0.94Bi0.061Se0.939Br0.061	711.38	0.4887	0.4869	0.0018	-0.368324	0.368324
Sn0.953Bi0.046Se0.955Br0.045	760.99	0.4567	0.455234	0.001466	-0.320998	0.320998
Sn0.976Bi0.011Se0.977Br0.023	573	0.572	0.570224	0.001776	-0.31049	0.31049
Sn0.991Bi0.004Se0.992Br0.008	453	0.7689	0.766516	0.002384	-0.310053	0.310053
Na0.01Ag0.01Sn0.998Se1	318	0.84885	0.846334	0.002516	-0.296401	0.296401
Na0.02Cu0.015Sn0.965Se1	775	0.46	0.458792	0.001208	-0.262609	0.262609
Sn0.952Bi0.045Se0.98Br0.02	774.15	0.539	0.537676	0.001324	-0.24564	0.24564
Sn0.94Bi0.061Se0.939Br0.061	303.15	0.868	0.866079	0.001921	-0.221313	0.221313
Cu0.015Sn0.985Se1	465.24	0.7284	0.726878	0.001522	-0.208951	0.208951
Sn0.997Bi0.005Se0.97Br0.03	323	1.0734	1.07123	0.002166	-0.201789	0.201789
Sn0.976Bi0.011Se0.977Br0.023	370.15	0.819	0.817367	0.001633	-0.199389	0.199389
Sn0.991Bi0.004Se0.992Br0.008	501.85	0.7022	0.700896	0.001304	-0.185702	0.185702
Sn0.982Bi0.02Se0.955Br0.045	774.15	0.455	0.454193	0.000807	-0.177363	0.177363
Cu0.022Sn0.98Se1	575	0.356	0.355425	0.000575	-0.161517	0.161517
Sn0.987Bi0.007Se0.984Br0.016	685	0.463	0.462309	0.000691	-0.149244	0.149244
Sn0.94Bi0.06Se1	667.156	0.528256	0.527544	0.000712	-0.134783	0.134783
Na0.01Cu0.01Sn0.98Se1	422.15	0.644	0.643137	0.000863	-0.134006	0.134006
Na0.029Cu0.002Sn0.969Se1	322.701	0.8903	0.889215	0.001085	-0.121869	0.121869
Sn0.972Bi0.029Se0.97Br0.03	775.15	0.338	0.337639	0.000361	-0.106805	0.106805
Sn0.94Bi0.06Se1	667.743	0.5281	0.527544	0.000556	-0.105283	0.105283
Na0.01Cu0.01Ag0.01Sn0.98Se1	726.15	0.453	0.452676	0.000324	-0.0715232	0.0715232
Na0.01Sn0.976Au0.01Se1	923	0.4694	0.469122	0.000278	-0.0592245	0.0592245
Na0.03Sn0.969Se1	675.15	0.465	0.464819	0.000181	-0.0389247	0.0389247
Na0.007Cu0.015Sn0.977Se1	465.56	0.7563	0.756346	-4.6e-05	0.00608224	0.00608224
Na0.01Cu0.011Sn0.978Se1	293	0.94415	0.944223	-7.3e-05	0.00773182	0.00773182
Cu0.015Sn0.985Se1	322	0.994	0.994213	-0.000213	0.0214286	0.0214286
Sn0.985Bi0.005Se0.98Br0.02	773.15	0.472	0.47224	-0.00024	0.0508475	0.0508475
Sn0.982Bi0.02Se0.955Br0.045	576.15	0.546	0.546399	-0.000399	0.0730769	0.0730769
Cu0.009Sn0.999Se1	824	0.924	0.924701	-0.000701	0.0758658	0.0758658
Sn0.984Bi0.021Se0.99Br0.01	754.546	0.4915	0.491878	-0.000378	0.0769074	0.0769074
Sn0.997Bi0.005Se0.97Br0.03	775	0.488	0.488522	-0.000522	0.106967	0.106967
Cu0.041Sn0.958Se1	623	0.4503	0.45079	-0.00049	0.108816	0.108816
Sn0.987Bi0.007Se0.984Br0.016	445	0.672	0.672895	-0.000895	0.133185	0.133185
Na0.028Cu0.01Sn0.963Se1	303	0.7985	0.799605	-0.001105	0.138384	0.138384
Na0.01Ag0.011Sn0.974Se1	916	0.4432	0.443836	-0.000636	0.143502	0.143502
Sn0.982Bi0.02Se0.955Br0.045	522	0.576	0.576884	-0.000884	0.153472	0.153472
Na0.012Cu0.008Sn0.994Ge0.025Se0.95S0.05	624	0.334	0.334532	-0.000532	0.159281	0.159281
Na0.029Cu0.002Sn0.969Se1	567	0.5638	0.564724	-0.000924	0.163888	0.163888
Na0.019Cu0.009Sn0.972Se1	718.31	0.4494	0.450513	-0.001113	0.247664	0.247664
Cu0.019Sn0.979Se1	576.15	0.5069	0.508182	-0.001282	0.25291	0.25291
Li0.01Cu0.009Sn0.974Se1	769	0.4304	0.431882	-0.001482	0.344331	0.344331
Na0.014Cu0.012Sn0.973Se1	774	0.438	0.439581	-0.001581	0.360959	0.360959
Cu0.01Sn0.989Se1	576.15	0.504	0.506068	-0.002068	0.410317	0.410317
Sn0.952Bi0.045Se0.98Br0.02	764.488	0.5356	0.537982	-0.002382	0.444735	0.444735
Cu0.078Sn0.918Se1	774	0.414	0.415903	-0.001903	0.459662	0.459662
Cu0.041Sn0.958Se1	522.15	0.5745	0.577382	-0.002882	0.501654	0.501654
Sn0.985Bi0.005Se0.98Br0.02	523.15	0.6	0.603033	-0.003033	0.5055	0.5055
Cu0.062Sn0.941Se1	373	0.91534	0.919987	-0.004647	0.50768	0.50768
Sn0.996Bi0.006Se0.974Br0.026	603	0.6326	0.635831	-0.003231	0.510749	0.510749
Sn0.94Bi0.061Se0.939Br0.061	662.01	0.5021	0.504691	-0.002591	0.516033	0.516033
Na0.01Cu0.011Sn0.978Se1	671	0.4489	0.446421	0.002479	0.552239	0.552239
Sn0.953Bi0.046Se0.955Br0.045	573.15	0.507	0.509839	-0.002839	0.559961	0.559961
Sn0.996Bi0.006Se0.974Br0.026	508	0.7367	0.740847	-0.004147	0.562916	0.562916
Sn0.997Bi0.005Se0.97Br0.03	675.15	0.52	0.523069	-0.003069	0.590192	0.590192
Na0.029Cu0.002Sn0.969Se1	665.5	0.4858	0.488787	-0.002987	0.614862	0.614862
Na0.01Ag0.01Sn0.981Se1	672.15	0.412	0.414574	-0.002574	0.624757	0.624757
Sn0.964Bi0.041Se1	320.15	0.959	0.965089	-0.006089	0.634932	0.634932
Sn0.94Bi0.061Se0.939Br0.061	612.908	0.52022	0.523903	-0.003683	0.70797	0.70797
Na0.019Cu0.009Sn0.972Se1	718	0.4494	0.452651	-0.003251	0.723409	0.723409
Na0.02Cu0.015Sn0.965Se1	303.69	0.9127	0.919334	-0.006634	0.726854	0.726854
Na0.007Cu0.015Sn0.977Se1	464.27	0.7578	0.763657	-0.005857	0.772895	0.772895
Sn0.964Bi0.041Se1	297.15	1.018	1.02604	-0.008039	0.789686	0.789686
Na0.01Cu0.002Ag0.006Sn0.97Ge0.001Se1	367.15	0.947	0.954587	-0.007587	0.801162	0.801162
Sn0.976Bi0.011Se0.977Br0.023	526	0.618	0.622981	-0.004981	0.805987	0.805987
Na0.029Cu0.002Sn0.969Se1	419.5	0.7382	0.745355	-0.007155	0.96925	0.96925
Na0.014Cu0.012Sn0.973Se1	517.69	0.5697	0.575333	-0.005633	0.988766	0.988766
Na0.014Cu0.012Sn0.973Se1	616.4	0.5141	0.51926	-0.00516	1.0037	1.0037
Cu0.01Sn0.989Se1	726.15	0.443	0.44748	-0.00448	1.01129	1.01129
Sn0.965Bi0.03Se0.994Br0.006	726	0.462	0.466977	-0.004977	1.07727	1.07727
Cu0.019Sn0.979Se1	374.15	0.7527	0.760912	-0.008212	1.09101	1.09101
Sn0.94Bi0.06Se1	522.15	0.59	0.596491	-0.006491	1.10017	1.10017
Na0.025Cu0.005Sn0.969Se1	624.15	0.431	0.435788	-0.004788	1.1109	1.1109
Cu0.078Sn0.918Se1	672	0.372	0.376136	-0.004136	1.11183	1.11183
Sn0.984Bi0.021Se0.99Br0.01	774	0.483	0.488475	-0.005475	1.13354	1.13354
Sn0.972Bi0.029Se0.97Br0.03	717	0.3567	0.361124	-0.004424	1.24026	1.24026
Na0.021Cu0.003Sn0.978Se1	562	0.5131	0.519481	-0.006381	1.24362	1.24362
Na0.014Cu0.006Sn0.98Se1	766.213	0.4207	0.425962	-0.005262	1.25077	1.25077
Na0.026Cu0.01Sn0.961Se1	369	0.7591	0.768614	-0.009514	1.25333	1.25333
Li0.01Cu0.009Sn0.974Se1	818	0.4766	0.482624	-0.006024	1.26395	1.26395
Na0.01Cu0.01Sn0.98Se1	322	0.847	0.857811	-0.010811	1.27639	1.27639
Cu0.041Sn0.958Se1	673	0.435	0.440592	-0.005592	1.28552	1.28552
Cu0.062Sn0.941Se1	421	0.804	0.814375	-0.010375	1.29042	1.29042
Cu0.009Sn0.999Se1	723	0.878	0.889354	-0.011354	1.29317	1.29317
Cu0.019Sn0.979Se1	424.15	0.6606	0.669226	-0.008626	1.30578	1.30578
Na0.019Cu0.009Sn0.972Se1	520.06	0.5739	0.581501	-0.007601	1.32445	1.32445
Sn0.982Bi0.026Se0.994Br0.006	753.11	0.4526	0.458709	-0.006109	1.34976	1.34976
Na0.01Cu0.002Ag0.006Sn0.97Ge0.001Se1	571	0.621	0.629807	-0.008807	1.4182	1.4182
Na0.03Sn0.969Se1	523	0.468	0.474669	-0.006669	1.425	1.425
Sn0.985Bi0.005Se0.98Br0.02	724	0.486	0.49295	-0.00695	1.43004	1.43004
Na0.013Cu0.002Sn0.986Se1	399	0.73	0.740564	-0.010564	1.44712	1.44712
Na0.01Cu0.01Sn0.98Se1	922	0.4555	0.462263	-0.006763	1.48474	1.48474
Sn0.965Bi0.03Se0.994Br0.006	504.04	0.5924	0.601236	-0.008836	1.49156	1.49156
Sn0.94Bi0.06Se1	622.15	0.546	0.554337	-0.008337	1.52692	1.52692
Sn0.985Bi0.005Se0.98Br0.02	623	0.529	0.537423	-0.008423	1.59225	1.59225
Sn0.988Bi0.01Se0.98Br0.02	515.84	0.6016	0.611251	-0.009651	1.60422	1.60422
Na0.011Cu0.008Sn0.978Se1	764.49	0.4551	0.462433	-0.007333	1.61129	1.61129
Sn0.953Bi0.046Se0.955Br0.045	662.75	0.4611	0.468584	-0.007484	1.62308	1.62308
Na0.01Cu0.01Sn0.98Se1	298	0.99	1.00634	-0.016341	1.65061	1.65061
Sn0.982Bi0.02Se0.955Br0.045	760.303	0.455	0.462511	-0.007511	1.65077	1.65077
Sn0.983Bi0.006Se0.977Br0.023	412.5	0.5968	0.607087	-0.010287	1.72369	1.72369
Sn0.982Bi0.02Se0.955Br0.045	724.15	0.455	0.463004	-0.008004	1.75912	1.75912
Cu0.078Sn0.918Se1	725.15	0.347	0.353294	-0.006294	1.81383	1.81383
Sn0.976Bi0.011Se0.977Br0.023	298	0.989	1.00697	-0.017975	1.81749	1.81749
Sn0.996Bi0.006Se0.974Br0.026	725.15	0.546	0.555958	-0.009958	1.82381	1.82381
Sn0.987Bi0.007Se0.984Br0.016	774.15	0.447	0.455232	-0.008232	1.84161	1.84161
Sn0.996Bi0.006Se0.974Br0.026	703	0.56	0.570477	-0.010477	1.87089	1.87089
Sn0.982Bi0.026Se0.994Br0.006	500.07	0.5792	0.590139	-0.010939	1.88864	1.88864
Na0.01Cu0.002Ag0.006Sn0.97Ge0.001Se1	726.15	0.497	0.50648	-0.00948	1.90744	1.90744
Na0.03Sn0.969Se1	524	0.573	0.584094	-0.011094	1.93613	1.93613
Cu0.01Sn0.989Se1	875.15	0.5041	0.513869	-0.009769	1.93791	1.93791
Na0.02Cu0.015Sn0.965Se1	463.26	0.6255	0.63767	-0.01217	1.94564	1.94564
Sn0.952Bi0.045Se0.98Br0.02	723.15	0.524	0.534363	-0.010363	1.97767	1.97767
Sn0.984Bi0.021Se0.99Br0.01	551.57	0.5827	0.594289	-0.011589	1.98885	1.98885
Na0.011Cu0.008Sn0.978Se1	615	0.525	0.535538	-0.010538	2.00724	2.00724
Na0.03Sn0.97Se1	396	0.6617	0.675049	-0.013349	2.01738	2.01738
Cu0.007Sn0.992Se1	775.15	0.463	0.472386	-0.009386	2.02721	2.02721
Na0.01Ag0.01Sn0.981Se1	724.15	0.382	0.389983	-0.007983	2.08979	2.08979
Sn0.984Bi0.021Se0.99Br0.01	704	0.4937	0.504313	-0.010613	2.14969	2.14969
Sn0.982Bi0.026Se0.994Br0.006	301.19	0.8997	0.920236	-0.020536	2.28254	2.28254
Na0.029Cu0.002Sn0.969Se1	303	0.9232	0.944408	-0.021208	2.29723	2.29723
Na0.014Cu0.012Sn0.973Se1	764.61	0.4368	0.446841	-0.010041	2.29876	2.29876
Na0.01Ag0.011Sn0.974Se1	522.788	0.61122	0.625278	-0.014058	2.29999	2.29999
Na0.09Cu0.012Ag0.01Sn0.971Se1	623.15	0.388	0.396965	-0.008965	2.31057	2.31057
Na0.01Cu0.002Ag0.006Sn0.97Ge0.001Se1	774	0.481	0.49214	-0.01114	2.31601	2.31601
Sn1.002Se1	371.15	0.907	0.928185	-0.021185	2.33572	2.33572
Cu0.041Sn0.958Se1	471	0.5435	0.556284	-0.012784	2.35216	2.35216
Na0.013Cu0.002Sn0.986Se1	597	0.46211	0.473037	-0.010927	2.36459	2.36459
Sn0.982Bi0.026Se0.994Br0.006	702	0.4652	0.476373	-0.011173	2.40176	2.40176
Na0.01Ag0.01Sn0.981Se1	723.15	0.421	0.431231	-0.010231	2.43017	2.43017
Cu0.021Sn0.983Se1	673.15	0.436	0.4466	-0.0106	2.43119	2.43119
Na0.015Sn0.985Se1	515	0.4745	0.486056	-0.011556	2.43541	2.43541
Na0.025Cu0.006Sn0.968Se1	620.66	0.4172	0.427381	-0.010181	2.44032	2.44032
Sn0.997Bi0.005Se0.97Br0.03	751.439	0.4893	0.50149	-0.01219	2.49131	2.49131
Cu0.007Sn0.992Se1	304.52	0.8653	0.886932	-0.021632	2.49994	2.49994
Sn0.952Bi0.045Se0.98Br0.02	320.15	0.929	0.952385	-0.023385	2.51722	2.51722
Sn0.972Bi0.029Se0.97Br0.03	470.753	0.4699	0.481748	-0.011848	2.52139	2.52139
Na0.03Sn0.97Se1	746.85	0.3696	0.379049	-0.009449	2.55655	2.55655
Na0.025Cu0.006Sn0.968Se1	521	0.5182	0.531582	-0.013382	2.5824	2.5824
Na0.01Ag0.01Sn0.998Se1	367	0.72538	0.744255	-0.018875	2.60208	2.60208
Sn0.99Bi0.005Se0.989Br0.011	323	0.927	0.951153	-0.024153	2.6055	2.6055
Sn0.965Bi0.03Se0.994Br0.006	345	0.8094	0.830625	-0.021225	2.62231	2.62231
Sn0.988Bi0.01Se0.98Br0.02	775	0.465	0.477493	-0.012493	2.68667	2.68667
Na0.03Sn0.969Se1	625.15	0.405	0.416105	-0.011105	2.74198	2.74198
Na0.01Ag0.011Sn0.974Se1	923	0.4431	0.455513	-0.012413	2.8014	2.8014
Sn0.996Bi0.006Se0.974Br0.026	774	0.5462	0.561538	-0.015338	2.80813	2.80813
Na0.021Cu0.003Sn0.978Se1	773	0.371	0.381451	-0.010451	2.81698	2.81698
Sn0.972Bi0.029Se0.97Br0.03	301.15	0.775	0.797112	-0.022112	2.85316	2.85316
Sn1.006Se1	774.15	0.456	0.469019	-0.013019	2.85504	2.85504
Na0.028Cu0.01Sn0.963Se1	773	0.371	0.381614	-0.010614	2.86092	2.86092
Na0.025Cu0.005Sn0.969Se1	424.15	0.585	0.601786	-0.016786	2.8694	2.8694
Na0.015Sn0.985Se1	471	0.4745	0.488295	-0.013795	2.90727	2.90727
Sn1.001Se1	465	0.555	0.571187	-0.016187	2.91658	2.91658
Na0.01Cu0.01Sn0.979Se1	724.15	0.386	0.397297	-0.011297	2.92668	2.92668
Na0.025Cu0.006Sn0.968Se1	669.95	0.3852	0.396476	-0.011276	2.92731	2.92731
Na0.01Ag0.01Sn0.981Se1	772	0.39	0.401551	-0.011551	2.96179	2.96179
Li0.01Cu0.009Sn0.974Se1	470	0.6149	0.633515	-0.018615	3.02732	3.02732
Na0.028Cu0.01Sn0.963Se1	669.34	0.3986	0.410692	-0.012092	3.03362	3.03362
Sn0.982Bi0.02Se0.955Br0.045	522.15	0.576	0.593603	-0.017603	3.05608	3.05608
Sn0.964Bi0.041Se1	523	0.669	0.689509	-0.020509	3.06562	3.06562
Sn0.952Bi0.045Se0.98Br0.02	715.301	0.53869	0.555501	-0.016811	3.12072	3.12072
Na0.011Cu0.008Sn0.978Se1	665	0.497	0.512518	-0.015518	3.12233	3.12233
Sn1.006Se1	371.15	0.987	1.0179	-0.030903	3.131	3.131
Li0.01Cu0.009Sn0.974Se1	371	0.8148	0.840347	-0.025547	3.13537	3.13537
Cu0.041Sn0.958Se1	419.15	0.71429	0.736737	-0.022447	3.14256	3.14256
Sn0.964Bi0.041Se1	576.15	0.625	0.644684	-0.019684	3.14944	3.14944
Na0.029Cu0.002Sn0.969Se1	715.245	0.4582	0.472681	-0.014481	3.16041	3.16041
Na0.014Cu0.012Sn0.973Se1	370.85	0.7924	0.818383	-0.025983	3.27903	3.27903
Na0.014Cu0.006Sn0.98Se1	469.78	0.5762	0.595119	-0.018919	3.28341	3.28341
Sn0.987Bi0.007Se0.984Br0.016	467	0.6384	0.65949	-0.02109	3.30357	3.30357
Cu0.021Sn0.983Se1	469.15	0.67	0.692301	-0.022301	3.32851	3.32851
Na0.03Sn0.97Se1	322	0.722	0.746112	-0.024112	3.33961	3.33961
Na0.028Cu0.01Sn0.963Se1	768.15	0.3767	0.389393	-0.012693	3.36952	3.36952
Sn0.953Bi0.046Se0.955Br0.045	662.32	0.4613	0.476949	-0.015649	3.39237	3.39237
Na0.01Cu0.01Ag0.01Sn0.98Se1	773	0.437	0.451872	-0.014872	3.4032	3.4032
Cu0.01Sn0.989Se1	525.15	0.5347	0.552918	-0.018218	3.40714	3.40714
Sn0.988Bi0.01Se0.98Br0.02	755.775	0.4694	0.485425	-0.016025	3.41393	3.41393
Sn0.987Bi0.007Se0.984Br0.016	509.26	0.58565	0.605718	-0.020068	3.42662	3.42662
Sn0.965Bi0.03Se0.994Br0.006	553	0.5476	0.566392	-0.018792	3.4317	3.4317
Sn0.972Bi0.029Se0.97Br0.03	519	0.4327	0.447555	-0.014855	3.43309	3.43309
Cu0.078Sn0.918Se1	299	0.867	0.896845	-0.029845	3.44233	3.44233
Na0.01Cu0.01Ag0.01Sn0.98Se1	573	0.546	0.564845	-0.018845	3.45147	3.45147
Cu0.041Sn0.958Se1	524	0.4969	0.514099	-0.017199	3.46126	3.46126
Na0.01Cu0.01Sn0.979Se1	724.15	0.389	0.402605	-0.013605	3.49743	3.49743
Na0.026Cu0.01Sn0.961Se1	663.14	0.4033	0.417659	-0.014359	3.56038	3.56038
Sn0.995Bi0.004Se0.992Br0.008	469.15	0.863	0.893875	-0.030875	3.57764	3.57764
Na0.011Cu0.008Sn0.978Se1	468.155	0.677	0.701362	-0.024362	3.59852	3.59852
Sn0.999Se0.94Br0.06	422.15	0.68	0.704615	-0.024615	3.61985	3.61985
Cu0.007Sn0.992Se1	322	0.8222	0.852155	-0.029955	3.64327	3.64327
Na0.01Ag0.01Sn0.981Se1	672.15	0.453	0.469588	-0.016588	3.66181	3.66181
Na0.012Cu0.008Sn0.979Se1	774.15	0.648	0.671924	-0.023924	3.69198	3.69198
Na0.03Sn0.97Se1	694	0.3855	0.399856	-0.014356	3.72399	3.72399
Sn0.983Bi0.006Se0.977Br0.023	321.29	0.741	0.768796	-0.027796	3.75115	3.75115
Na0.01Cu0.01Sn0.979Se1	321	0.826	0.857175	-0.031175	3.77421	3.77421
Cu0.007Sn0.992Se1	368.82	0.7299	0.757657	-0.027757	3.80285	3.80285
Sn0.952Bi0.045Se0.98Br0.02	301.15	0.974	1.01152	-0.037521	3.85226	3.85226
Cu0.078Sn0.918Se1	573.15	0.421	0.437231	-0.016231	3.85534	3.85534
Sn0.988Bi0.01Se0.98Br0.02	726.15	0.467	0.485132	-0.018132	3.88266	3.88266
Na0.013Cu0.002Sn0.986Se1	494.9	0.5802	0.602772	-0.022572	3.89038	3.89038
Sn0.94Bi0.06Se1	321.15	0.827	0.859602	-0.032602	3.9422	3.9422
Sn0.952Bi0.045Se0.98Br0.02	522.15	0.629	0.654263	-0.025263	4.01638	4.01638
Sn0.982Bi0.026Se0.994Br0.006	599.96	0.5055	0.526041	-0.020541	4.0635	4.0635
Sn0.984Bi0.021Se0.99Br0.01	302.32	0.9946	1.03515	-0.040553	4.07732	4.07732
Na0.026Cu0.01Sn0.961Se1	662	0.4036	0.420098	-0.016498	4.08771	4.08771
Na0.01Cu0.011Sn0.978Se1	522	0.5435	0.565921	-0.022421	4.1253	4.1253
Sn0.987Bi0.007Se0.984Br0.016	757.06	0.447	0.465805	-0.018805	4.20694	4.20694
Sn0.94Bi0.06Se1	297.15	0.886	0.923301	-0.037301	4.21005	4.21005
Sn1.006Se1	874	0.44	0.458804	-0.018804	4.27364	4.27364
Na0.01Cu0.002Ag0.006Sn0.97Ge0.001Se1	774.15	0.481	0.50166	-0.02066	4.29522	4.29522
Na0.01Ag0.01Sn0.981Se1	773	0.367	0.382848	-0.015848	4.31826	4.31826
Sn0.987Bi0.007Se0.984Br0.016	605.8	0.5017	0.523377	-0.021677	4.32071	4.32071
Na0.09Cu0.012Ag0.01Sn0.971Se1	424.15	0.497	0.5186	-0.0216	4.34608	4.34608
Sn0.999Se0.94Br0.06	321.15	0.896	0.935783	-0.039783	4.44007	4.44007
Sn0.94Bi0.061Se0.939Br0.061	466.757	0.622072	0.649734	-0.027662	4.44675	4.44675
Na0.013Cu0.002Sn0.986Se1	355	0.813	0.84931	-0.03631	4.46617	4.46617
Na0.01Cu0.01Ag0.01Sn0.98Se1	627.15	0.515	0.538129	-0.023129	4.49107	4.49107
Na0.026Cu0.01Sn0.961Se1	712	0.3817	0.39889	-0.01719	4.50354	4.50354
Na0.021Cu0.003Sn0.978Se1	660.87	0.425	0.444282	-0.019282	4.53694	4.53694
Cu0.08Sn0.919Se1	521	0.653	0.682698	-0.029698	4.54793	4.54793
Na0.012Cu0.008Sn0.994Ge0.025Se0.95S0.05	320	0.684	0.715148	-0.031148	4.5538	4.5538
Na0.01Sn0.976Au0.01Se1	916	0.4694	0.490808	-0.021408	4.56072	4.56072
Na0.014Cu0.006Sn0.98Se1	518.79	0.536	0.560717	-0.024717	4.61138	4.61138
Sn0.991Bi0.004Se0.992Br0.008	406.9	0.8479	0.88724	-0.03934	4.6397	4.6397
Na0.025Cu0.006Sn0.968Se1	571.212	0.4614	0.482868	-0.021468	4.6528	4.6528
Na0.012Cu0.008Sn0.994Ge0.025Se0.95S0.05	369	0.58856	0.615997	-0.027437	4.66172	4.66172
Cu0.019Sn0.979Se1	826.15	0.46089	0.482964	-0.022074	4.78943	4.78943
Sn0.988Bi0.01Se0.98Br0.02	296.15	1.024	1.07392	-0.049923	4.87529	4.87529
Na0.01Sn0.976Au0.01Se1	724	0.439	0.460987	-0.021987	5.00843	5.00843
Na0.026Cu0.01Sn0.961Se1	773	0.362	0.380225	-0.018225	5.03453	5.03453
Sn0.99Bi0.005Se0.989Br0.011	467.15	0.673	0.707321	-0.034321	5.0997	5.0997
Sn0.997Se1	373.15	0.715	0.751504	-0.036504	5.10545	5.10545
Sn0.995Se0.959Br0.041	663	0.5353	0.562905	-0.027605	5.15692	5.15692
Na0.015Sn0.985Se1	418.49	0.5584	0.587411	-0.029011	5.19538	5.19538
Na0.011Cu0.008Sn0.978Se1	774	0.454	0.478055	-0.024055	5.29846	5.29846
Na0.021Cu0.005Sn0.974Se1	524	0.524	0.552058	-0.028058	5.35458	5.35458
Sn0.995Bi0.004Se0.992Br0.008	627.15	0.632	0.665999	-0.033999	5.37959	5.37959
Sn0.964Bi0.041Se1	666.741	0.5698	0.600459	-0.030659	5.38066	5.38066
Na0.01Ag0.01Sn0.98Se1	295	1.032	1.08758	-0.055579	5.38556	5.38556
Na0.02Cu0.015Sn0.965Se1	415	0.6851	0.722381	-0.037281	5.44169	5.44169
Cu0.062Sn0.941Se1	775	0.347	0.366024	-0.019024	5.48242	5.48242
Cu0.062Sn0.941Se1	825	0.331	0.349157	-0.018157	5.4855	5.4855
Na0.007Cu0.015Sn0.977Se1	416.55	0.824	0.869271	-0.045271	5.49405	5.49405
Sn0.987Bi0.007Se0.984Br0.016	656	0.4749	0.501129	-0.026229	5.52306	5.52306
Cu0.078Sn0.918Se1	526	0.471	0.497029	-0.026029	5.52633	5.52633
Na0.02Cu0.015Sn0.965Se1	367	0.7652	0.80774	-0.04254	5.55933	5.55933
Na0.026Cu0.01Sn0.961Se1	514	0.5347	0.564473	-0.029773	5.56817	5.56817
Na0.011Cu0.003Sn0.99Se1	422.28	0.5905	0.623601	-0.033101	5.60559	5.60559
Sn0.999Se1	372	0.929	0.981234	-0.052234	5.6226	5.6226
Sn0.953Bi0.046Se0.955Br0.045	466.64	0.5766	0.609476	-0.032876	5.7017	5.7017
Cu0.062Sn0.941Se1	725	0.378	0.399572	-0.021572	5.70688	5.70688
Cu0.041Sn0.958Se1	422	0.6056	0.640297	-0.034697	5.72936	5.72936
Na0.036Cu0.014Sn0.948Se1	723	0.414	0.437849	-0.023849	5.76063	5.76063
Cu0.01Sn0.989Se1	775	0.4277	0.452795	-0.025095	5.86743	5.86743
Na0.03Sn0.97Se1	776.15	0.353	0.373726	-0.020726	5.87139	5.87139
Na0.01Ag0.01Sn0.998Se1	824	0.4167	0.441173	-0.024473	5.87305	5.87305
Cu0.041Sn0.958Se1	370	0.6987	0.740216	-0.041516	5.94189	5.94189
Na0.03Sn0.97Se1	524	0.399	0.422915	-0.023915	5.99373	5.99373
Na0.014Cu0.012Sn0.973Se1	468.58	0.6188	0.656002	-0.037202	6.01196	6.01196
Sn0.997Se1	773	0.412	0.436836	-0.024836	6.02816	6.02816
Na0.015Sn0.985Se1	673.15	0.337	0.357465	-0.020465	6.0727	6.0727
Sn1.002Se1	573.15	0.458	0.485825	-0.027825	6.07533	6.07533
Na0.025Cu0.005Sn0.969Se1	320.15	0.786	0.833797	-0.047797	6.08104	6.08104
Na0.01Cu0.01Sn0.98Se1	873	0.456	0.483817	-0.027817	6.10022	6.10022
Sn0.995Se0.959Br0.041	775.15	0.475	0.504194	-0.029194	6.14611	6.14611
Na0.014Cu0.006Sn0.98Se1	323.166	0.82597	0.876747	-0.050777	6.14756	6.14756
Sn0.972Bi0.029Se0.97Br0.03	422.2	0.5248	0.557154	-0.032354	6.16502	6.16502
Sn0.997Bi0.005Se0.97Br0.03	549	0.6218	0.660233	-0.038433	6.18093	6.18093
Na0.011Cu0.008Sn0.978Se1	419.69	0.76355	0.810779	-0.047229	6.18545	6.18545
Sn0.94Bi0.061Se0.939Br0.061	514.91	0.5786	0.614525	-0.035925	6.20895	6.20895
Na0.01Cu0.011Sn0.978Se1	522	0.541727	0.575617	-0.03389	6.25592	6.25592
Na0.01Ag0.01Sn0.998Se1	421	0.6327	0.672319	-0.039619	6.26189	6.26189
Sn0.997Se1	572	0.502	0.533511	-0.031511	6.27709	6.27709
Sn0.953Bi0.046Se0.955Br0.045	419.23	0.6225	0.662252	-0.039752	6.38586	6.38586
Sn0.983Bi0.006Se0.977Br0.023	752.79	0.3056	0.325251	-0.019651	6.4303	6.4303
Cu0.041Sn0.958Se1	320	0.822995	0.876176	-0.053181	6.46189	6.46189
Sn0.988Bi0.01Se0.98Br0.02	332	0.9213	0.982145	-0.060845	6.60425	6.60425
Sn0.99Bi0.005Se0.989Br0.011	366.15	0.808	0.861639	-0.053639	6.63849	6.63849
Na0.012Cu0.008Sn0.994Ge0.025Se0.95S0.05	421	0.5249	0.560168	-0.035268	6.71899	6.71899
Na0.033Cu0.016Sn0.961Se1	303.74	0.7307	0.779821	-0.049121	6.72246	6.72246
Na0.03Sn0.97Se1	298	0.8203	0.875662	-0.055362	6.74899	6.74899
Na0.01Cu0.01Sn0.979Se1	672.15	0.421	0.449582	-0.028582	6.78907	6.78907
Na0.01Ag0.01Sn0.981Se1	773	0.39	0.416502	-0.026502	6.79538	6.79538
Na0.012Cu0.008Sn0.994Ge0.025Se0.95S0.05	772	0.334	0.356766	-0.022766	6.81617	6.81617
Sn0.991Bi0.004Se0.992Br0.008	550.3	0.6494	0.693792	-0.044392	6.83585	6.83585
Cu0.08Sn0.919Se1	773	0.4776	0.510334	-0.032734	6.85385	6.85385
Sn0.997Se1	824.15	0.443	0.473473	-0.030473	6.87878	6.87878
Na0.01Sn0.976Au0.01Se1	420	0.7722	0.825495	-0.053295	6.90171	6.90171
Sn1.001Se1	761.087	0.3734	0.399196	-0.025796	6.90841	6.90841
Na0.03Sn0.969Se1	319	0.78	0.833927	-0.053927	6.91372	6.91372
Na0.01Sn0.976Au0.01Se1	767	0.424	0.453539	-0.029539	6.96675	6.96675
Na0.028Cu0.01Sn0.963Se1	372.22	0.6854	0.733162	-0.047762	6.96849	6.96849
Na0.025Cu0.006Sn0.968Se1	670.23	0.385	0.411983	-0.026983	7.00857	7.00857
Na0.01Ag0.011Sn0.974Se1	372.15	0.357	0.382025	-0.025025	7.0098	7.0098
Na0.019Cu0.009Sn0.972Se1	569.85	0.5223	0.558943	-0.036643	7.0157	7.0157
Sn1.001Se1	513.38	0.509	0.545375	-0.036375	7.14637	7.14637
Na0.012Cu0.008Sn0.994Ge0.025Se0.95S0.05	622	0.318	0.340729	-0.022729	7.14748	7.14748
Sn0.965Bi0.03Se0.994Br0.006	301.4	0.8885	0.952013	-0.063513	7.14834	7.14834
Na0.033Cu0.016Sn0.961Se1	371.11	0.6465	0.692826	-0.046326	7.16566	7.16566
Na0.03Cu0.008Sn0.962Se1	711	0.4365	0.468033	-0.031533	7.22405	7.22405
Na0.03Sn0.97Se1	310	0.7996	0.857389	-0.057789	7.22724	7.22724
Na0.01Ag0.01Sn0.98Se1	468.15	0.641	0.687459	-0.046459	7.24789	7.24789
Sn0.983Bi0.006Se0.977Br0.023	652	0.3513	0.3769	-0.0256	7.28722	7.28722
Sn0.995Se0.959Br0.041	616	0.563	0.604187	-0.041187	7.31563	7.31563
Sn1.001Se1	301.95	0.844	0.906229	-0.062229	7.3731	7.3731
Na0.03Cu0.008Sn0.962Se1	711.76	0.4365	0.468838	-0.032338	7.40848	7.40848
Na0.03Cu0.008Sn0.962Se1	771.15	0.42	0.451249	-0.031249	7.44024	7.44024
Na0.026Cu0.01Sn0.961Se1	417	0.6736	0.723899	-0.050299	7.46719	7.46719
Na0.01Cu0.01Ag0.01Sn0.98Se1	372.15	0.812	0.872773	-0.060773	7.48436	7.48436
Sn0.972Bi0.029Se0.97Br0.03	618.26	0.3902	0.419486	-0.029286	7.50538	7.50538
Na0.01Ag0.01Sn0.981Se1	571	0.499	0.536816	-0.037816	7.57836	7.57836
Sn0.999Se0.94Br0.06	624.15	0.525	0.5649	-0.0399	7.6	7.6
Na0.03Sn0.97Se1	674.15	0.292	0.314319	-0.022319	7.64349	7.64349
Sn0.972Bi0.029Se0.97Br0.03	667	0.375	0.403841	-0.028841	7.69093	7.69093
Na0.012Cu0.008Sn0.994Ge0.025Se0.95S0.05	300	0.684	0.736898	-0.052898	7.73363	7.73363
Sn1.001Se1	294.15	0.876	0.944162	-0.068162	7.78105	7.78105
Sn0.995Bi0.004Se0.992Br0.008	574	0.693	0.747015	-0.054015	7.79437	7.79437
Na0.09Cu0.012Ag0.01Sn0.971Se1	674	0.3725	0.401539	-0.029039	7.7957	7.7957
Na0.033Cu0.016Sn0.961Se1	420.44	0.5918	0.637944	-0.046144	7.79723	7.79723
Na0.09Cu0.012Ag0.01Sn0.971Se1	475.15	0.466	0.502475	-0.036475	7.82725	7.82725
Cu0.011Sn0.991Se1	673	0.148	0.159589	-0.011589	7.83041	7.83041
Cu0.007Sn0.992Se1	416	0.6571	0.708613	-0.051513	7.83945	7.83945
Sn0.995Se0.959Br0.041	578.15	0.575	0.620627	-0.045627	7.93513	7.93513
Sn1.001Se1	322.87	0.792	0.856028	-0.064028	8.08434	8.08434
Na0.012Cu0.008Sn0.994Ge0.025Se0.95S0.05	515.528	0.4135	0.446938	-0.033438	8.08658	8.08658
Na0.012Cu0.008Sn0.994Ge0.025Se0.95S0.05	663	0.3022	0.326667	-0.024467	8.09629	8.09629
Na0.012Cu0.008Sn0.994Ge0.025Se0.95S0.05	673	0.3022	0.326667	-0.024467	8.09629	8.09629
Na0.011Cu0.003Sn0.99Se1	304.05	0.7302	0.789391	-0.059191	8.10614	8.10614
Sn1.002Se1	724.15	0.3969	0.429769	-0.032869	8.28143	8.28143
Cu0.009Sn0.999Se1	776	0.832368	0.901879	-0.069511	8.35099	8.35099
Li0.01Cu0.009Sn0.974Se1	420	0.6918	0.750203	-0.058403	8.44218	8.44218
Sn0.984Bi0.021Se0.99Br0.01	295.15	1.025	1.11278	-0.087785	8.56439	8.56439
Cu0.01Sn0.989Se1	825.15	0.4736	0.514362	-0.040762	8.60684	8.60684
Sn0.983Bi0.006Se0.977Br0.023	702.89	0.3242	0.352168	-0.027968	8.62677	8.62677
Cu0.011Sn0.991Se1	874	0.1617	0.175661	-0.013961	8.63389	8.63389
Na0.01Cu0.01Sn0.979Se1	773	0.374	0.406791	-0.032791	8.76765	8.76765
Sn0.953Bi0.046Se0.955Br0.045	371.65	0.6743	0.734405	-0.060105	8.91369	8.91369
Na0.011Cu0.008Sn0.978Se1	322.15	0.908	0.989098	-0.081098	8.9315	8.9315
Na0.028Cu0.01Sn0.963Se1	570.64	0.457	0.49819	-0.04119	9.01313	9.01313
Cu0.022Sn0.98Se1	826	0.1935	0.211199	-0.017699	9.14677	9.14677
Na0.01Cu0.002Ag0.006Sn0.97Ge0.001Se1	465.15	0.745	0.813192	-0.068192	9.15329	9.15329
Na0.03Sn0.97Se1	574.15	0.338	0.369002	-0.031002	9.17219	9.17219
Na0.01Cu0.011Sn0.978Se1	293	0.9472	1.03432	-0.087116	9.19721	9.19721
Na0.012Cu0.008Sn0.994Ge0.025Se0.95S0.05	572	0.4135	0.451548	-0.038048	9.20145	9.20145
Na0.036Cu0.014Sn0.948Se1	750	0.4119	0.450208	-0.038308	9.30032	9.30032
Na0.03Sn0.969Se1	369.15	0.67	0.733417	-0.063417	9.46522	9.46522
Sn1.002Se1	824.15	0.277	0.303358	-0.026358	9.51552	9.51552
Cu0.019Sn0.979Se1	526	0.538	0.589463	-0.051463	9.56561	9.56561
Cu0.009Sn0.999Se1	572	1.048	1.14864	-0.100639	9.60296	9.60296
Sn0.982Bi0.026Se0.994Br0.006	361.7	0.7716	0.845975	-0.074375	9.63906	9.63906
Sn0.995Bi0.004Se0.992Br0.008	528.15	0.739	0.811607	-0.072607	9.82503	9.82503
Na0.012Cu0.008Sn0.994Ge0.025Se0.95S0.05	419	0.5408	0.593943	-0.053143	9.82674	9.82674
Na0.01Ag0.01Sn0.981Se1	321	0.809	0.888906	-0.079906	9.87713	9.87713
Sn0.999Se0.94Br0.06	522.15	0.541	0.596056	-0.055056	10.1767	10.1767
Na0.03Sn0.97Se1	574	0.338	0.372623	-0.034623	10.2435	10.2435
Na0.013Cu0.002Sn0.986Se1	752.85	0.3699	0.408145	-0.038245	10.3393	10.3393
Sn0.995Bi0.004Se0.992Br0.008	675	0.616	0.680094	-0.064094	10.4049	10.4049
Na0.03Sn0.969Se1	421	0.577	0.63806	-0.06106	10.5823	10.5823
Sn1.001Se1	774	0.369	0.408794	-0.039794	10.7843	10.7843
Sn0.987Bi0.007Se0.984Br0.016	300.87	0.99024	1.09991	-0.109673	11.0754	11.0754
Cu0.021Sn0.983Se1	725.15	0.39	0.433572	-0.043572	11.1723	11.1723
Na0.033Cu0.016Sn0.961Se1	673	0.355	0.394768	-0.039768	11.2023	11.2023
Na0.01Ag0.01Sn0.998Se1	774.15	0.3858	0.429409	-0.043609	11.3035	11.3035
Sn1.002Se1	774	0.382	0.426193	-0.044193	11.5688	11.5688
Cu0.019Sn0.979Se1	826	0.43	0.479864	-0.049864	11.5963	11.5963
Na0.021Cu0.003Sn0.978Se1	709	0.3958	0.441904	-0.046104	11.6483	11.6483
Na0.036Cu0.014Sn0.948Se1	640	0.449608	0.502095	-0.052487	11.6739	11.6739
Sn0.983Bi0.006Se0.977Br0.023	555.85	0.4267	0.476696	-0.049996	11.7169	11.7169
Na0.03Sn0.97Se1	353	0.7272	0.813349	-0.086149	11.8467	11.8467
Sn1.001Se1	416	0.615	0.690127	-0.075127	12.2158	12.2158
Na0.01Ag0.011Sn0.974Se1	768	0.3973	0.445956	-0.048656	12.2467	12.2467
Na0.011Cu0.003Sn0.99Se1	372	0.6454	0.724927	-0.079527	12.3221	12.3221
Na0.01Cu0.01Sn0.98Se1	775.15	0.3927	0.44144	-0.04874	12.4115	12.4115
Na0.01Cu0.01Sn0.98Se1	472.15	0.502	0.564354	-0.062354	12.4211	12.4211
Na0.01Cu0.01Sn0.98Se1	299.15	0.879	0.9894	-0.1104	12.5597	12.5597
Na0.014Cu0.006Sn0.98Se1	775	0.402	0.453268	-0.051268	12.7532	12.7532
Sn0.997Se1	295	0.883	0.997216	-0.114216	12.935	12.935
Na0.012Cu0.008Sn0.979Se1	523.15	0.759	0.858859	-0.099859	13.1567	13.1567
Sn0.982Bi0.026Se0.994Br0.006	405.94	0.6962	0.788429	-0.092229	13.2475	13.2475
Sn0.953Bi0.046Se0.955Br0.045	300.15	0.76	0.862078	-0.102078	13.4313	13.4313
Na0.09Cu0.012Ag0.01Sn0.971Se1	424	0.497	0.56378	-0.06678	13.4366	13.4366
Na0.01Ag0.011Sn0.974Se1	724	0.4278	0.485485	-0.057685	13.4841	13.4841
Sn0.999Se0.94Br0.06	296.15	0.974	1.10541	-0.13141	13.4918	13.4918
Na0.01Cu0.01Sn0.979Se1	773	0.371	0.421585	-0.050585	13.6348	13.6348
Sn0.995Bi0.004Se0.992Br0.008	775.15	0.57	0.648034	-0.078034	13.6902	13.6902
Na0.01Cu0.01Sn0.98Se1	572.15	0.439	0.499595	-0.060595	13.803	13.803
Na0.028Cu0.01Sn0.963Se1	323.34	0.7644	0.87027	-0.10587	13.8501	13.8501
Na0.025Cu0.006Sn0.968Se1	773	0.343	0.390909	-0.047909	13.9676	13.9676
Sn1.002Se1	369.15	0.68705	0.783149	-0.096099	13.9872	13.9872
Na0.09Cu0.012Ag0.01Sn0.971Se1	572.15	0.419	0.479822	-0.060822	14.516	14.516
Cu0.041Sn0.958Se1	294	0.8385	0.961111	-0.122611	14.6227	14.6227
Na0.011Cu0.003Sn0.99Se1	673	0.353	0.405073	-0.052073	14.7516	14.7516
Cu0.021Sn0.983Se1	773	0.358	0.412627	-0.054627	15.2589	15.2589
Na0.015Sn0.985Se1	296	0.72	0.833419	-0.113419	15.7526	15.7526
Sn1.002Se1	421.15	0.595	0.688971	-0.093971	15.7934	15.7934
Na0.021Cu0.005Sn0.974Se1	320.15	0.786	0.911223	-0.125223	15.9317	15.9317
Sn1.002Se1	471.15	0.5343	0.6198	-0.0855	16.0022	16.0022
Na0.025Cu0.005Sn0.969Se1	369.15	0.678	0.788654	-0.110654	16.3206	16.3206
Sn1.002Se1	825	0.427	0.499237	-0.072237	16.9173	16.9173
Sn0.972Bi0.029Se0.97Br0.03	577.15	0.38	0.444649	-0.064649	17.0129	17.0129
Sn1.002Se1	523.15	0.48856	0.572055	-0.083495	17.09	17.09
Sn0.999Se1	299	0.752	0.882014	-0.130014	17.2891	17.2891
Sn0.983Bi0.006Se0.977Br0.023	774.15	0.302	0.354446	-0.052446	17.3662	17.3662
Na0.015Sn0.985Se1	322.97	0.6623	0.780579	-0.118279	17.8588	17.8588
Sn0.999Se1	925	0.457	0.539559	-0.082559	18.0654	18.0654
Na0.036Cu0.014Sn0.948Se1	775.15	0.406	0.480687	-0.074687	18.3958	18.3958
Na0.01Cu0.01Sn0.98Se1	371.15	0.675	0.799412	-0.124412	18.4314	18.4314
Na0.01Cu0.01Sn0.98Se1	523	0.487	0.577025	-0.090025	18.4856	18.4856
Na0.01Ag0.01Sn0.98Se1	724.15	0.36	0.427518	-0.067518	18.755	18.755
Na0.01Cu0.01Sn0.979Se1	294.15	0.81	0.967064	-0.157064	19.3906	19.3906
Na0.03Sn0.97Se1	774	0.261	0.311806	-0.050806	19.4659	19.4659
Na0.01Sn0.976Au0.01Se1	522.53	0.54515	0.657542	-0.112392	20.6167	20.6167
Sn1.002Se1	813.866	0.305	0.378644	-0.073644	24.1456	24.1456
Na0.01Ag0.011Sn0.974Se1	422	0.3109	0.390205	-0.079305	25.5082	25.5082
Na0.013Cu0.002Sn0.986Se1	771.15	0.334	0.42084	-0.08684	26	26
Cu0.005Sn0.998Se1	776	0.29828	0.38293	-0.08465	28.3794	28.3794
Na0.01Ag0.011Sn0.974Se1	523	0.2642	0.34124	-0.07704	29.1597	29.1597
Na0.01Ag0.011Sn0.974Se1	295	0.41975	0.543876	-0.124126	29.5714	29.5714
Na0.01Ag0.01Sn0.98Se1	773	0.328	0.428265	-0.100265	30.5686	30.5686
Sn1.002Se1	774.15	0.292	0.392715	-0.100715	34.4914	34.4914
Cu0.011Sn0.991Se1	371	0.269661	0.367854	-0.098193	36.4135	36.4135
Cu0.062Sn0.941Se1	875	0.252508	0.356692	-0.104184	41.2597	41.2597
Cu0.078Sn0.918Se1	304	0.78	1.14225	-0.362249	46.4422	46.4422
Na0.01Ag0.011Sn0.974Se1	321	0.404	0.594239	-0.190239	47.0889	47.0889
Sn1.002Se1	874.15	0.246	0.384959	-0.138959	56.4874	56.4874
Cu0.011Sn0.991Se1	470	0.215	0.337507	-0.122507	56.98	56.98
Na0.012Cu0.008Sn0.979Se1	680	0.427	0.674257	-0.247257	57.9056	57.9056
Cu0.011Sn0.991Se1	419	0.242695	0.405907	-0.163212	67.2498	67.2498
Cu0.022Sn0.98Se1	926	0.112	0.205357	-0.093357	83.3545	83.3545
							Average
							6.51067

## Sheet: Test dataset
sample	temperature	measured	predicted	difference measured-predicted	percent error (+underestimated, -overestimated)	absolute percent error
Na0.033Ag0.015Sn0.961Se1	296.15	0.851033	0.804167	0.046866	5.50695	5.50695
Na0.034Sn0.959Au0.015Se1	296.15	0.960057	0.925538	0.034519	3.59552	3.59552
Sn0.999Se0.94Br0.06	297.15	0.77575	0.893273	-0.117523	-15.1496	15.1496
Sn1Se0.94Cl0.06	297.15	1.01495	0.925951	0.088998	8.76872	8.76872
Sn1.002Se0.9Br0.1	301.918	0.913226	0.971135	-0.057909	-6.34115	6.34115
Na0.033Ag0.016Sn0.963Se1	305.492	0.94084	0.865362	0.075478	8.02241	8.02241
Na0.032Sn0.963Au0.015Se1	305.43	0.976852	0.992178	-0.015326	-1.56892	1.56892
Na0.033Ag0.015Sn0.961Se1	369.15	0.693434	0.676284	0.01715	2.4732	2.4732
Na0.034Sn0.959Au0.015Se1	372.15	0.758755	0.755954	0.002801	0.369157	0.369157
Sn0.999Se0.94Br0.06	372.15	0.6206	0.794365	-0.173765	-27.9995	27.9995
Sn1Se0.94Cl0.06	371.15	0.808787	0.777516	0.031271	3.86641	3.86641
Sn1.002Se0.9Br0.1	371.789	0.749908	0.87302	-0.123112	-16.4169	16.4169
Na0.033Ag0.016Sn0.963Se1	374.497	0.775147	0.735705	0.039442	5.08833	5.08833
Na0.032Sn0.963Au0.015Se1	373.044	0.825944	0.807839	0.018105	2.19204	2.19204
Na0.032Sn0.963Au0.015Se1	421.336	0.750141	0.743801	0.00634	0.845174	0.845174
Na0.033Ag0.015Sn0.961Se1	474.15	0.535836	0.637371	-0.101535	-18.9489	18.9489
Na0.034Sn0.959Au0.015Se1	473.15	0.603907	0.672149	-0.068242	-11.3001	11.3001
Sn0.999Se0.94Br0.06	472.15	0.511995	0.652292	-0.140297	-27.402	27.402
Sn1Se0.94Cl0.06	471.15	0.634343	0.700379	-0.066036	-10.4101	10.4101
Sn1.002Se0.9Br0.1	467.312	0.594953	0.65796	-0.063007	-10.5902	10.5902
Na0.033Ag0.016Sn0.963Se1	471.889	0.591824	0.581511	0.010313	1.74258	1.74258
Na0.032Sn0.963Au0.015Se1	469.184	0.684811	0.666053	0.018758	2.73915	2.73915
Na0.033Ag0.015Sn0.961Se1	575.15	0.441276	0.560501	-0.119225	-27.0182	27.0182
Na0.034Sn0.959Au0.015Se1	574.15	0.526483	0.595279	-0.068796	-13.0671	13.0671
Sn0.999Se0.94Br0.06	573.15	0.49648	0.579438	-0.082958	-16.7092	16.7092
Sn1Se0.94Cl0.06	572.15	0.55505	0.618425	-0.063375	-11.4179	11.4179
Sn1.002Se0.9Br0.1	564.295	0.559783	0.568844	-0.009061	-1.61866	1.61866
Na0.033Ag0.016Sn0.963Se1	569.544	0.503329	0.535761	-0.032432	-6.4435	6.4435
Na0.032Sn0.963Au0.015Se1	566.285	0.565455	0.584341	-0.018886	-3.33997	3.33997
Na0.033Ag0.015Sn0.961Se1	674.15	0.425517	0.492129	-0.066612	-15.6544	15.6544
Na0.034Sn0.959Au0.015Se1	674.15	0.510998	0.519436	-0.008438	-1.65128	1.65128
Sn0.999Se0.94Br0.06	673.15	0.574055	0.502793	0.071262	12.4138	12.4138
Sn1Se0.94Cl0.06	673.15	0.55505	0.526776	0.028274	5.09396	5.09396
Sn1.002Se0.9Br0.1	662.155	0.543904	0.468738	0.075166	13.8197	13.8197
Na0.033Ag0.016Sn0.963Se1	667.13	0.452032	0.448155	0.003877	0.857683	0.857683
Na0.032Sn0.963Au0.015Se1	663.981	0.480043	0.48189	-0.001847	-0.384757	0.384757
Na0.033Ag0.015Sn0.961Se1	775.15	0.425517	0.41714	0.008377	1.96866	1.96866
Na0.034Sn0.959Au0.015Se1	774.15	0.480029	0.461473	0.018556	3.8656	3.8656
Sn0.999Se0.94Br0.06	774.15	0.52751	0.465219	0.062291	11.8085	11.8085
Sn1Se0.94Cl0.06	773.15	0.507474	0.471741	0.035733	7.04135	7.04135
Sn1.002Se0.9Br0.1	760.792	0.511041	0.464028	0.047013	9.19946	9.19946
Na0.033Ag0.016Sn0.963Se1	765.382	0.415249	0.427354	-0.012105	-2.91512	2.91512
Na0.032Sn0.963Au0.015Se1	762.394	0.458197	0.472152	-0.013955	-3.04563	3.04563
Na0.032Sn0.963Au0.015Se1	811.889	0.465423	0.453293	0.01213	2.60623	2.60623
Na0.033Ag0.015Sn0.961Se1	873.15	0.472796	0.41714	0.055656	11.7717	11.7717
Na0.034Sn0.959Au0.015Se1	872.15	0.526483	0.450264	0.076219	14.477	14.477
Sn0.999Se0.94Br0.06	872.15	0.55854	0.468848	0.089692	16.0583	16.0583
Sn1Se0.94Cl0.06	872.15	0.570909	0.468848	0.102061	17.8769	17.8769
Sn1.002Se0.9Br0.1	860.3	0.518549	0.442659	0.07589	14.6351	14.6351
Na0.033Ag0.016Sn0.963Se1	864.393	0.420607	0.401912	0.018695	4.44477	4.44477
Na0.033Ag0.015Sn0.961Se1	923.15	0.409757	0.407986	0.001771	0.432207	0.432207
Na0.034Sn0.959Au0.015Se1	921.15	0.480029	0.441111	0.038918	8.10743	8.10743
Sn0.999Se0.94Br0.06	922.15	0.52751	0.459695	0.067815	12.8557	12.8557
Sn1Se0.94Cl0.06	921.15	0.602626	0.459695	0.142931	23.718	23.718
Sn1.002Se0.9Br0.1	910.26	0.533078	0.424776	0.108302	20.3164	20.3164
Na0.033Ag0.016Sn0.963Se1	914.144	0.355423	0.384029	-0.028606	-8.04844	8.04844
Na0.032Sn0.963Au0.015Se1	911.36	0.430797	0.436192	-0.005395	-1.25233	1.25233
							Average
							9.07495
